# Supplementary material for: A convergent approach to polycyclic aromatic hydrocarbons
Source: Royal Society of Chemistry journal article supplement (doi:10.1039/c1cc15095b), 2011-01-01

## Supporting Information

# A Convergent Approach to Polycyclic Aromatic Hydrocarbons

Raphaël F. Guignard\* and Samir Z. Zard\*

*Laboratoire de Synthèse Organique, CNRS UMR 7652, Ecole Polytechnique, DCSO,  
91128 Palaiseau, France*

zard@poly.polytechnique.

### Contents:

|                                                             |       |
|-------------------------------------------------------------|-------|
| General Experimental Methods.....                           | 2     |
| List of the Abbreviations Used.....                         | 3     |
| Experimental Procedures and Spectroscopic Data.....         | 4-19  |
| Copies of $^1\text{H}$ and $^{13}\text{C}$ NMR Spectra..... | 20-65 |

## General Experimental Methods

Purification procedures were in accordance with the instructions in D. D. Perrin and W. L. F. Armarego, "Purification of Laboratory Chemicals", Fourth Edition, The Bath Press, Bath, 2002. All reactions were carried out under dry, oxygen free nitrogen. Flash chromatography was performed on silica gel (SDS, 60 Å C. C. 40-63 mm) as the stationary phase. Thin Layer Chromatography (TLC) was performed on alumina plates pre-coated with silica gel (Merck silica gel, 60 F254), which were visualized by the quenching of UV fluorescence when applicable ( $\lambda_{\text{max}} = 254 \text{ nm}$  and/or  $366 \text{ nm}$ ) and/or by staining with vanillin or anisadehyde in acidic ethanol followed by heating. Infrared spectra were recorded as solutions in  $\text{CH}_2\text{Cl}_2$  using NaCl cells, on a Perkin-Elmer FT 2000. Absorption maxima ( $\lambda_{\text{max}}$ ) are reported in wavenumbers ( $\text{cm}^{-1}$ ) and only selected peaks are reported. Magnetic resonance spectra were recorded at room temperature on a Bruker Avance DPX 400 instrument. Proton magnetic resonance spectra ( $^1\text{H}$  NMR) were recorded at 400 MHz and coupling constants ( $J$ ) are reported to  $\pm 0.5 \text{ Hz}$ . The following abbreviations were utilized to describe peak patterns when appropriate: br = broad, s = singlet, d = doublet, t = triplet, q = quartet, quint = quintuplet, hex = hexuplet, hept = heptuplet, oct = octuplet and m = multiplet. Carbon magnetic resonance spectra ( $^{13}\text{C}$  NMR) were recorded in the same instrument at 100.6 MHz. Chemical shifts ( $\delta\text{H}$ ,  $\delta\text{C}$ ) are quoted in parts per million (ppm) and are referenced to TMS (0 ppm). Low-resolution mass spectra ( $m/z$ ) were recorded by chemical ionization (CI/ $\text{NH}_3$ ) on a Hewlett-Packard HP 5989B and only report molecular species ( $[\text{M}+\text{H}]^+$ ,  $[\text{M}+\text{NH}_4]^+$ ) and other major fragments. High-resolution mass spectra were recorded by positive electron impact ionization (EI+) at 70 e.V. on a JEOL JMS-GCmate II mass spectrometer. The quoted masses are accurate to  $\pm 5 \text{ ppm}$ . The names of the molecules that appear in the following pages were generated using either Beilstein AutoNom 2000 (CAS) or ChemBioDraw Ultra 10.0.

## List of the Abbreviations Used

AcOEt

DCM

DLP

EP

EtOH

IR

iPrOH

Mp

P-TSA

RT

Ethyl acetate

Dichloromethane

Dilauroyl peroxide

Petroleum ether

Ethanol

Infrared

Isopropanol

Melting point

p-Toluenesulfonic acid

Room temperature

## Experimental Procedures and Spectroscopic Data

### General procedure A for the preparation of xanthates

To a solution of the corresponding bromo-acetophenone (1.0 eq) in acetone (1 mL.mmol<sup>-1</sup>) under a nitrogen at 0 °C was added potassium O-ethylxanthate (1.2 eq) portionwise. The mixture was stirred for 15 min and then quenched by the addition of water (1 mL.mmol<sup>-1</sup>). The solvent was removed under reduced pressure and the residue was diluted with ethyl acetate (5 mL.mmol<sup>-1</sup>). The organic layer was separated and the aqueous layer extracted with ethyl acetate (5 mL.mmol<sup>-1</sup>). The combined organic layers were washed with brine, dried over magnesium sulfate and concentrated under reduced pressure. The crude residue was purified by recrystallisation in a mixture of hexane and ethyl acetate.

### General procedure B for radical addition/cyclisation reactions

A stirred solution of xanthate (1.0 eq) and olefin (2.0 eq) in ethyl acetate (3 mL.mmol<sup>-1</sup> with respect to the xanthate) was refluxed for 15 minutes under a nitrogen atmosphere. Dilauroyl peroxide (DLP) was then added in 20 %mol portions every 60 minutes until complete consumption of the starting material was observed. The reaction mixture was then cooled to room temperature and evaporated to dryness under reduced pressure. The crude residue was purified by flash chromatography on silica gel to yield the desired compound.

### General procedure C for the addition of phenyl lithium to ketones

To a solution of iodobenzene (3.3 eq) in diethylether (1.0 mL.mmol<sup>-1</sup>) at -78 °C under a nitrogen atmosphere was added *n*BuLi (3.0 eq) dropwise. The solution was stirred for 60 min at -78 °C. After this time a solution of the ketone (1.0 eq) in diethylether (0.15 mL.mmol<sup>-1</sup>) was added dropwise to the mixture. After 15 min the solution was allowed to warm up to RT and the reaction was stirred for 1 h. Water (5 mL.mmol<sup>-1</sup>) and NH<sub>4</sub>Cl (sat. aq.) (5 mL.mmol<sup>-1</sup>) were added to the reaction mixture. The layers were separated and the aqueous phase extracted further with DCM three times (5 mL.mmol<sup>-1</sup>). The combined organic layers were dried over MgSO<sub>4</sub> and evaporated under reduced pressure. The crude residue was purified by flash chromatography on silica gel to give the desired product.

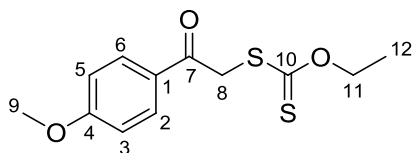

Compound **3a**: O-ethyl S-2-(4-methoxyphenyl)-2-oxoethyl carbonodithioate

Following the general procedure **A**, the reaction was carried out with 2-bromo-1-(4-methoxyphenyl)ethanone (12.0 g, 52.4 mmol). Recrystallisation afforded the desired product as a yellow solid (12.2 g, 45.0 mmol, 86 %).

**<sup>1</sup>H NMR** ( $\delta$ , ppm) ( $\text{CDCl}_3$ , 400 MHz): 8.01 (m, 2H,  $\text{C}_2\text{H}$  &  $\text{C}_6\text{H}$ ); 6.96 (m, 2H,  $\text{C}_3\text{H}$  &  $\text{C}_5\text{H}$ ); 4.63 (q, 2H,  $J = 7.1$  Hz,  $\text{OC}_{11}\text{H}_2$ ); 4.62 (s, 2H,  $\text{SC}_8\text{H}_2$ ); 3.88 (s, 3H,  $\text{OC}_9\text{H}_3$ ); 1.39 (t, 3H,  $J = 7.1$  Hz,  $\text{C}_{12}\text{H}_3$ ). **<sup>13</sup>C NMR** ( $\delta$ , ppm) ( $\text{CDCl}_3$ , 100.6 MHz): 213.48 ( $\text{C}_{10}\text{S}$ ); 190.78 ( $\text{C}_7\text{O}$ ); 164.00 ( $\text{C}_4\text{O}$ ); 130.82 ( $\text{C}_2\text{H}$  &  $\text{C}_6\text{H}$ ); 128.78 ( $\text{C}_1$ ); 113.96 ( $\text{C}_3\text{H}$  &  $\text{C}_5\text{H}$ ); 70.61 ( $\text{C}_{11}\text{H}_2\text{O}$ ); 55.54 ( $\text{OC}_9\text{H}_3$ ); 43.36 ( $\text{C}_8\text{H}_2$ ); 13.73 ( $\text{C}_{12}\text{H}_3$ ). **IR** ( $\text{cm}^{-1}$ ) ( $\text{CCl}_4$ ): 2986, 2961, 2938, 2840, 1681, 1602, 1222.

**HRMS** ( $\text{EI}^+$ ) calcd for  $\text{C}_{12}\text{H}_{14}\text{O}_3\text{S}_2$  270.0384, found: 270.0392. **Mp**: 67 °C.

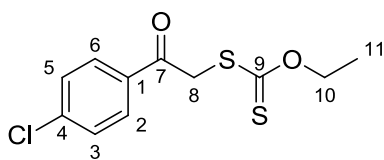

Compound **3b**: O-ethyl S-2-(4-chlorophenyl)-2-oxoethyl carbonodithioate

Following the general procedure **A**, the reaction was carried out with 2-bromo-1-(4-chlorophenyl)ethanone (9.00 g, 38.5 mmol). Recrystallisation afforded the desired product as a white solid (8.79 g, 32.0 mmol, 83 %).

**<sup>1</sup>H NMR** ( $\delta$ , ppm) ( $\text{CDCl}_3$ , 400 MHz): 8.02 (d, 2H,  $J = 8.7$  Hz,  $\text{C}_2\text{H}$  &  $\text{C}_6\text{H}$ ); 7.53 (d, 2H,  $J = 8.7$  Hz,  $\text{C}_3\text{H}$  &  $\text{C}_5\text{H}$ ); 4.69 (q, 2H,  $J = 7.1$  Hz,  $\text{OC}_{10}\text{H}_2$ ); 4.68 (s, 2H,  $\text{SC}_8\text{H}_2$ ); 1.45 (t, 3H,  $J = 7.1$  Hz,  $\text{C}_{11}\text{H}_3$ ). **<sup>13</sup>C NMR** ( $\delta$ , ppm) ( $\text{CDCl}_3$ , 100.6 MHz): 213.18 ( $\text{C}_9\text{S}$ ); 191.41 ( $\text{C}_7\text{O}$ ); 140.39 ( $\text{C}_1$ ); 130.17 ( $\text{C}_4\text{Cl}$ ); 129.91 ( $\text{C}_2\text{H}$  &  $\text{C}_6\text{H}$ ); 129.23 ( $\text{C}_3\text{H}$  &  $\text{C}_5\text{H}$ ); 71.02 ( $\text{C}_{10}\text{H}_2\text{O}$ ); 43.54 ( $\text{C}_8\text{H}_2$ ); 13.73 ( $\text{C}_{11}\text{H}_3$ ). **IR** ( $\text{cm}^{-1}$ ) ( $\text{CCl}_4$ ): 2987, 2902, 1690, 1590, 1221. **HRMS** ( $\text{EI}^+$ ) calcd for  $\text{C}_{12}\text{H}_{14}\text{O}_3\text{S}_2$  270.0384, found: 270.0373. **Mp**: 69 °C (decomp.).

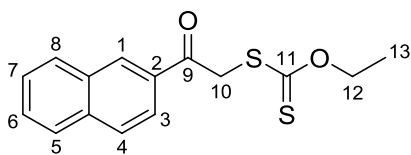

Compound **3c**: O-ethyl S-2-(naphthalen-2-yl)-2-oxoethyl carbonodithioate

Following the general procedure **A**, the reaction was carried out with 2-bromo-1-(naphthalen-2-yl)ethanone (11.1 g, 44.58 mmol). Recrystallisation afforded the desired product as a yellow solid (11.4 g, 49.3 mmol, 88 %).

**<sup>1</sup>H NMR** ( $\delta$ , ppm) (CDCl<sub>3</sub>, 400 MHz): 8.57 (s, 1H, C<sub>1</sub>H); 8.48 (dd, 1H,  $J_1 = 1.2$  Hz,  $J_2 = 8.5$  Hz, C<sub>3</sub>H); 8.00 (d, 1H,  $J = 8.0$  Hz, C<sub>5</sub>H); 7.93 (d, 1H,  $J = 8.7$  Hz, C<sub>4</sub>H); 7.90 (d, 1H,  $J = 8.1$  Hz, C<sub>8</sub>H); 7.63 (t, 1H,  $J = 7.4$  Hz, C<sub>7</sub>H); 7.58 (t, 1H,  $J = 7.4$  Hz, C<sub>6</sub>H); 4.80 (s, 2H, C<sub>10</sub>H<sub>2</sub>); 4.66 (q, 2H,  $J = 7.1$  Hz, OC<sub>12</sub>H<sub>2</sub>); 1.40 (t, 3H,  $J = 7.1$  Hz, C<sub>13</sub>H<sub>3</sub>). **<sup>13</sup>C NMR** ( $\delta$ , ppm) (CDCl<sub>3</sub>, 100.6 MHz): 213.34 (C<sub>1</sub>S); 192.27 (C<sub>10</sub>O); 135.84 (C<sub>2</sub>); 133.16 (C<sub>IV</sub>); 132.43 (C<sub>IV</sub>); 130.34 (C<sub>1</sub>H); 129.68 (C<sub>5</sub>H); 128.86 (C<sub>7</sub>H); 128.72 (C<sub>4</sub>H); 127.83 (C<sub>8</sub>H); 127.00 (C<sub>6</sub>H); 123.90 (C<sub>3</sub>H); 70.72 (OC<sub>12</sub>H<sub>2</sub>); 43.61 (C<sub>10</sub>H<sub>2</sub>); 13.74 (C<sub>13</sub>H<sub>3</sub>). **IR** (cm<sup>-1</sup>) (CCl<sub>4</sub>): 3063, 2987, 2902, 1685, 1220. **HRMS** (EI+) calcd for C<sub>15</sub>H<sub>14</sub>O<sub>2</sub>S<sub>2</sub> 290.0435, found: 290.0422. **Mp**: 98 °C.

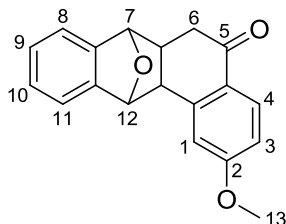

Compound **4a**: 7,12-epoxy-5,6,6A,7,12,12A-hexahydro-2-methoxybenz(a)anthrac-5-one

Following the general procedure **B**, the reaction was carried out with xanthate **3a** (400 mg, 1.48 mmol). Total consumption of starting material took 160 %mol of DLP. Purification by column chromatography (EP/Ether from 90/10 to 60/40) yielded the desired product as a white solid (189 mg, 0.647 mmol, 43 %).

**<sup>1</sup>H NMR** ( $\delta$ , ppm) (CDCl<sub>3</sub>, 400 MHz): 7.86 (d, 1H,  $J = 8.5$  Hz, C<sub>4</sub>H); 7.39 – 7.37 (m, 1H, C<sub>11</sub>H); 7.34 – 7.32 (m, 1H, C<sub>8</sub>H); 7.25 – 7.23 (m, 2H, C<sub>9</sub>H & C<sub>10</sub>H); 6.92 (d, 1H,  $J = 2.4$  Hz, C<sub>1</sub>H); 6.89 (dd, 1H,  $J_1 = 2.5$  Hz,  $J_2 = 8.5$  Hz, C<sub>3</sub>H); 5.18 (s, 1H, C<sub>12</sub>H); 5.05 (s, 1H, C<sub>7</sub>H); 3.19 (d, 1H,  $J = 7.9$  Hz, C<sub>12'</sub>H); 2.89 (dd, 1H,  $J_1 = 3.4$  Hz,  $J_2 = 15.6$  Hz, C<sub>6</sub>H), 2.82 (dd, 1H,  $J_1 = 8.2$  Hz,  $J_2 = 15.6$  Hz, C<sub>6</sub>H); 2.52 (ddd, 1H,  $J_1 = 3.3$  Hz,  $J_2 = 7.9$  Hz,  $J_3 = 8.3$  Hz, C<sub>6</sub>H). **<sup>13</sup>C NMR** ( $\delta$ , ppm) (CDCl<sub>3</sub>, 100.6 MHz): 196.60 (C<sub>5</sub>O); 163.74 (C<sub>2</sub>); 145.17 (C<sub>IV</sub>); 145.03 (C<sub>IV</sub>); 144.49 (C<sub>IV</sub>); 128.21 (C<sub>4</sub>H); 128.05 (C<sub>IV</sub>); 127.21 & 127.132 (C<sub>8</sub>H & C<sub>11</sub>H); 119.35 (C<sub>8</sub>H); 119.24 (C<sub>11</sub>H); 113.43 (C<sub>1</sub>H); 112.67 (C<sub>3</sub>H); 87.80 (OC<sub>7</sub>H); 86.46 (OC<sub>12</sub>H); 55.54 (OC<sub>13</sub>H<sub>3</sub>); 44.11 (C<sub>12'</sub>); 41.81 (C<sub>6</sub>H<sub>2</sub>); 37.66 (C<sub>6</sub>H). **IR** (cm<sup>-1</sup>) (CCl<sub>4</sub>): 3002, 2942, 2839, 1692, 1602, 1271. **HRMS** (EI+) calcd for C<sub>19</sub>H<sub>16</sub>O<sub>3</sub> 292.1099, found: 292.1102. **Mp**: 142 °C.

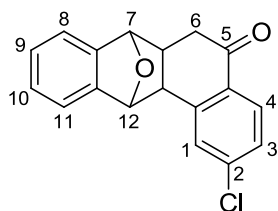

Compound **4b**: 2-chloro-7,12-epoxy-5,6,6A,7,12,12A-hexahydrobenz(a)anthrac-5-one

Following the general procedure **B**, the reaction was carried out with xanthate **3b** (1.88 g, 13.1 mmol). Total consumption of starting material took 160 %mol of DLP. Purification by column chromatography (EP/Ether: 85/15) yielded the desired product as a slightly yellow solid (713 mg, 2.40 mmol, 36 %).

**<sup>1</sup>H NMR** ( $\delta$ , ppm) ( $\text{CDCl}_3$ , 400 MHz): 7.80 (d, 1H,  $J = 8.3$  Hz,  $\text{C}_4\text{H}$ ); 7.48 (d, 1H,  $J = 1.7$  Hz,  $\text{C}_1\text{H}$ ); 7.40 – 7.38 (m, 1H,  $\text{C}_{11}\text{H}$ ); 7.40 – 7.33 (m, 2H); 7.27 – 7.24 (m, 2H); 5.18 (s, 1H,  $\text{OC}_{12}\text{H}$ ); 5.02 (s, 1H,  $\text{OC}_7\text{H}$ ); 3.21 (d, 1H,  $J = 7.8$  Hz;  $\text{C}_{12'}\text{H}$ ); 2.93 (dd, 1H,  $J_1 = 2.8$  Hz,  $J_2 = 15.4$  Hz,  $\text{C}_6\text{H}_2$ ); 2.81 (dd, 1H,  $J_1 = 8.3$  Hz,  $J_2 = 15.4$  Hz,  $\text{C}_6\text{H}_2$ ); 2.55 (ddd, 1H,  $J_1 = 2.8$  Hz,  $J_2 = 8.1$  Hz,  $J_3 = 8.1$  Hz,  $\text{C}_6'\text{H}$ ). **<sup>13</sup>C NMR** ( $\delta$ , ppm) ( $\text{CDCl}_3$ , 100.6 MHz): 196.70 ( $\text{C}_5\text{O}$ ); 144.88 ( $\text{C}_{\text{IV}}$ ); 144.66 ( $\text{C}_{\text{IV}}$ ); 144.07 ( $\text{C}_{\text{IV}}$ ); 139.50 ( $\text{C}_{\text{IV}}$ ); 133.02 ( $\text{C}_{\text{IV}}$ ); 128.83 ( $\text{C}_1\text{H}$ ); 127.44 (CH); 127.39 (CH); 127.32 (2CH); 119.37 (2C,  $\text{C}_8\text{H}$  &  $\text{C}_{11}\text{H}$ ); 87.61 ( $\text{OC}_7\text{H}$ ); 86.32 ( $\text{OC}_{12}\text{H}$ ); 43.81 ( $\text{C}_{12'}\text{H}$ ); 41.94 ( $\text{C}_6\text{H}_2$ ); 37.87 ( $\text{C}_6'\text{H}$ ). **IR** ( $\text{cm}^{-1}$ ) ( $\text{CCl}_4$ ): 2928, 2856, 1706, 1595, 1282. **HRMS** (EI+) calcd for  $\text{C}_{19}\text{H}_{16}\text{O}_3$  292.1099, found: 296.0604. **Mp**: 195 °C.

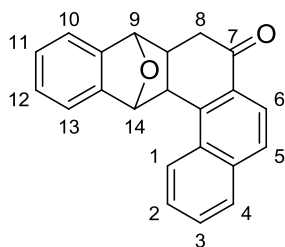

Compound **4c** : 9,14-epoxy-7,8,8A,9,14,14A-hexahydronaphth(1,2-a)anthrac-7-one

Following the general procedure **B**, the reaction was carried out with xanthate **3c** (1.74 g, 6.00 mmol). Total consumption of starting material took 160 %mol of DLP. Purification by column chromatography (EP/Ether from 95/5 to 80/20) yielded the desired product as a slightly yellow solid (424 mg, 1.36 mmol, 23 %).

**<sup>1</sup>H NMR** ( $\delta$ , ppm) ( $\text{CDCl}_3$ , 400 MHz): 8.16 (d, 1H,  $J = 8.2$  Hz,  $\text{C}_1\text{H}$ ); 7.97 (d, 1H,  $J = 8.5$  Hz,  $\text{C}_6\text{H}$ ); 7.96 – 7.94 (m, 1H,  $\text{C}_4\text{H}$ ); 7.84 (d, 1H,  $J = 8.5$  Hz,  $\text{C}_5\text{H}$ ); 7.73 – 7.65 (m, 2H,  $\text{C}_2\text{H}$  &  $\text{C}_3\text{H}$ ); 7.52 – 7.50 (m, 1H,  $\text{C}_{13}\text{H}$ ); 7.41 – 7.39 (m, 1H,  $\text{C}_{10}\text{H}$ ); 7.34 – 7.27 (m, 2H,  $\text{C}_{11}\text{H}$  &  $\text{C}_{12}\text{H}$ ); 4.00 (s, 1H,  $\text{C}_{14}\text{H}$ ); 3.98 (s, 1H,  $\text{C}_9\text{H}$ ); 7.85 (d, 1H,  $J = 7.8$  Hz,  $\text{C}_{14'}\text{H}$ ); 3.07 (dd, 1H,  $J_1 = 1.9$  Hz,  $J_2 = 15.6$  Hz,  $\text{C}_8\text{H}_2$ ); 2.93 (dd, 1H,  $J_1 = 8.9$  Hz,  $J_2 = 15.6$  Hz,  $\text{C}_8\text{H}_2$ ); 2.71 – 2.66 (m, 1H,  $\text{C}_8'\text{H}$ ). **<sup>13</sup>C**

**NMR** ( $\delta$ , ppm) ( $\text{CDCl}_3$ , 100.6 MHz): 197.86 ( $\text{C}_7\text{O}$ ); 145.25 ( $\text{C}_9$ ); 144.38 ( $\text{C}_{13'}$ ); 140.14 ( $\text{C}_{IV}$ ); 136.23 ( $\text{C}_{IV}$ ); 132.07 ( $\text{C}_{IV}$ ); 131.13 ( $\text{C}_{IV}$ ); 129.47 ( $\text{C}_4\text{H}$ ); 127.88 ( $\text{CH}$ ); 127.46 ( $\text{CH}$ ); 127.39 ( $\text{CH}$ ); 127.32 (2C,  $\text{CH}$ ); 124.00 ( $\text{C}_1\text{H}$ ); 122.24 ( $\text{C}_6\text{H}$ ); 119.51 ( $\text{C}_{10}\text{H}$ ); 119.10 ( $\text{C}_{13}\text{H}$ ); 86.81 ( $\text{C}_{14}\text{H}$ ), 86.56 ( $\text{C}_9\text{H}$ ); 41.45 ( $\text{C}_8\text{H}_2$ ); 40.00 ( $\text{C}_{14'}\text{H}$ ); 37.40 ( $\text{C}_8'\text{H}$ ). **IR** ( $\text{cm}^{-1}$ ) ( $\text{CCl}_4$ ): 3067, 2953, 1696, 1282. **HRMS** ( $\text{EI}^+$ ) calcd for  $\text{C}_{22}\text{H}_{16}\text{O}_2$  312.1150, found: 312.1149. **Mp**: 188 °C.

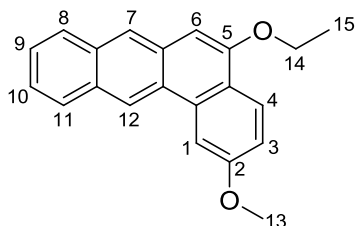

#### Compound **5a**: 5-ethoxy-2-methoxybenz(a)anthracene

Ketone **4a** (49.0 mg, 0.168 mmol, 1.0 eq) was dissolved in EtOH (2.0 ml) containing  $\text{H}_2\text{SO}_4$  (1.0 M). The solution was refluxed. After 36 h, the reaction mixture was cooled down at room temperature and water (3 mL) was added. The layers were separated and the aqueous phase extracted further with DCM three times (3 mL). The combined organic layers were dried over  $\text{MgSO}_4$  and evaporated under reduced pressure. The crude residue was purified by column chromatography (Pentane/Ether from 100/0 to 50/50). The desired compound was obtained as a brown solid and 3 mg of the starting material were recovered (35 mg, 0.168 mmol, 69 % (74 %)).

**$^1\text{H}$  NMR** ( $\delta$ , ppm) ( $\text{CDCl}_3$ , 400 MHz): 8.93 (s, 1H,  $\text{C}_{12}\text{H}$ ); 8.29 (d, 1H,  $J = 8.9$  Hz,  $\text{C}_4\text{H}$ ); 8.16 (d, 1H,  $J = 2.4$  Hz,  $\text{C}_1\text{H}$ ); 8.14 (s, 1H,  $\text{C}_7\text{H}$ ); 8.06 (d, 1H,  $J = 7.9$  Hz,  $\text{C}_{11}\text{H}$ ); 7.95 (d, 1H,  $J = 7.9$  Hz,  $\text{C}_8\text{H}$ ); 7.53 – 7.45 (m, 2H,  $\text{C}_9\text{H}$  &  $\text{C}_{10}\text{H}$ ); 7.25 (dd, 1H,  $J_1 = 2.4$  Hz,  $J_2 = 9.0$  Hz,  $\text{C}_3\text{H}$ ); 6.84 (s, 1H,  $\text{C}_6\text{H}$ ); 4.28 (q, 2H,  $J = 6.9$  Hz,  $\text{OC}_{14}\text{H}_2$ ); 4.05 (s, 3H,  $\text{OC}_{13}\text{H}_3$ ); 1.60 (t, 3H,  $J = 6.9$  Hz,  $\text{C}_{15}\text{H}_3$ ).  **$^{13}\text{C}$  NMR** ( $\delta$ , ppm) ( $\text{CDCl}_3$ , 100.6 MHz): 159.06 ( $\text{C}_2\text{O}$ ); 152.73 ( $\text{C}_5\text{O}$ ); 132.97 ( $\text{C}_{4'}$ ); 132.47 ( $\text{C}_{12'}$ ); 132.17 ( $\text{C}_{11'}$ ); 130.29 ( $\text{C}_7'$ ); 128.40 ( $\text{C}_{11}\text{H}$ ); 127.00 ( $\text{C}_8\text{H}$ ); 125.82 ( $\text{C}_6'$ ); 125.73 ( $\text{C}_{10}\text{H}$ ); 124.42 ( $\text{C}_9\text{H}$ ); 124.34 ( $\text{C}_4\text{H}$ ); 124.23 ( $\text{C}_7\text{H}$ ); 121.63 ( $\text{C}_{12''}$ ); 124.38 ( $\text{C}_{12}\text{H}$ ); 115.49 ( $\text{C}_3\text{H}$ ); 105.30 ( $\text{C}_1\text{H}$ ); 99.74 ( $\text{C}_6\text{H}$ ); 63.39 ( $\text{OC}_{14}\text{H}_2$ ); 55.49 ( $\text{OC}_{13}\text{H}_3$ ); 14.78 ( $\text{C}_{15}\text{H}_3$ ). **IR** ( $\text{cm}^{-1}$ ) ( $\text{CCl}_4$ ): 3055, 2929, 2855. **HRMS** ( $\text{EI}^+$ ) calcd for  $\text{C}_{21}\text{H}_{18}\text{O}_2$  302.1307, found: 302.1309. **Mp**: 102 °C.

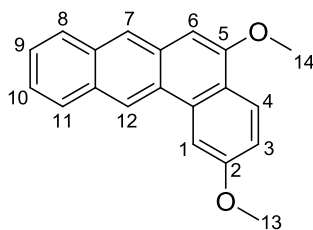



Compound **5b**: 2,5-dimethoxybenz(a)anthracene

Ketone **4a** (51.2 mg, 0.178 mmol, 1.0 eq) was dissolved in MeOH (2.0 ml) containing H<sub>2</sub>SO<sub>4</sub> (1.0 M). The solution was refluxed. After 18 h, the reaction mixture was cooled down at room temperature, water (3mL) was added and the precipitate was filtrated, dissolved in DCM and dried over MgSO<sub>4</sub>. The solvent was then evaporated under reduced pressure and the crude residue dissolved in acetonitrile. This solution was washed with pentane and the solvent was evaporated under reduced pressure. We obtained a 2:1 mixture of the desired product and dimethylsulfate as a brown solid (45.5 mg, 0.158 mmol, 88 %).

<sup>1</sup>H NMR (δ, ppm) (CDCl<sub>3</sub>, 400 MHz): 8.94 (s, 1H, C<sub>12</sub>H); 8.24 (d, 1H, J = 8.9 Hz, C<sub>4</sub>H); 8.17 (s, 2H, C<sub>1</sub>H & C<sub>7</sub>H); 8.06 (d, 1H, J = 7.9 Hz, C<sub>11</sub>H); 7.95 (d, 1H, J = 8.0 Hz, C<sub>8</sub>H); 7.52 – 7.45 (m, 2H, C<sub>9</sub>H & C<sub>10</sub>H); 7.24 (dd, 1H, J<sub>1</sub> = 2.4 Hz, J<sub>2</sub> = 8.9 Hz, C<sub>3</sub>H); 6.88 (s, 1H, C<sub>6</sub>H); 4.09 & 4.06 (s, 3H, OC<sub>13</sub>H<sub>3</sub> & OC<sub>14</sub>H<sub>3</sub>). <sup>13</sup>C NMR (δ, ppm) (CDCl<sub>3</sub>, 100.6 MHz): 159.10 (C<sub>2</sub>O); 153.59 (C<sub>5</sub>O); 133.06 (C<sub>4'</sub>); 132.50 (C<sub>11'</sub>); 132.01 (C<sub>12'</sub>); 130.36 (C<sub>7'</sub>); 128.41 (C<sub>11</sub>H); 127.03 (C<sub>8</sub>H); 125.87 (C<sub>12''</sub>); 125.84 & 124.56 (C<sub>9</sub> & C<sub>10</sub>); 124.40 (C<sub>7</sub>H); 124.30 (C<sub>4</sub>H); 121.54 (C<sub>6'</sub>), 124.47 (C<sub>12</sub>H); 115.52 (C<sub>3</sub>H); 105.49 (C<sub>1</sub>H); 99.23 (C<sub>6</sub>H); 55.60 & 55.35 (OC<sub>13</sub>H<sub>3</sub> & OC<sub>14</sub>H<sub>3</sub>).

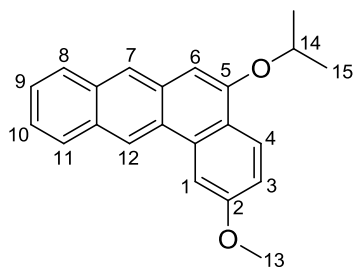

Compound **5c**: 5-isopropoxy-2-methoxybenz(a)anthracene

Ketone **4a** (100 mg, 0.342 mmol, 1.0 eq) was dissolved in iPrOH (3.4 ml) containing H<sub>2</sub>SO<sub>4</sub> (1.0 M). The solution was refluxed. After 18 h, the reaction mixture was cooled down at room temperature and water (3mL) was added. The layers were separated and the aqueous phase extracted further with DCM three times (3mL). The combined organic layers were dried over MgSO<sub>4</sub> and evaporated under reduced pressure. The crude residue was purified by column chromatography (EP/AcOEt : 95/5). The desired compound was obtained as an orange solid (43 mg, 0.136 mmol, 40 %).

<sup>1</sup>H NMR (δ, ppm) (CDCl<sub>3</sub>, 400 MHz): 8.97 (s, 1H, C<sub>12</sub>H); 8.30 (d, 1H, J = 8.9 Hz, C<sub>4</sub>H); 8.19 (d, 1H, J = 2.5 Hz, C<sub>1</sub>H); 8.16 (s, 1H, C<sub>7</sub>H); 8.08 (d, 1H, J = 8.0 Hz, C<sub>11</sub>H); 7.96 (d, 1H, J = 8.0 Hz, C<sub>8</sub>H); 7.53 – 7.45 (m, 2H, C<sub>9</sub>H & C<sub>10</sub>H); 7.25 (dd, 1H, J<sub>1</sub> = 2.5 Hz, J<sub>2</sub> = 8.9 Hz, C<sub>3</sub>H); 6.90 (s, 1H, C<sub>6</sub>H); 4.89 (sept, 1H, J = 6.0 Hz, OC<sub>14</sub>H); 4.07 (s, 3H, OC<sub>13</sub>H<sub>3</sub>); 1.53 (t, 6H, J = 6.0 Hz, C<sub>15</sub>H<sub>3</sub>). <sup>13</sup>C NMR (δ, ppm) (CDCl<sub>3</sub>, 100.6 MHz): 159.07 (C<sub>2</sub>O); 151.42 (C<sub>5</sub>O); 133.15

(C<sub>4'</sub>); 132.51 & 132.27 (C<sub>11'</sub> & C<sub>12'</sub>); 130.29 (C<sub>7'</sub>); 128.41 (C<sub>11</sub>H); 127.01 (C<sub>8</sub>H); 125.75 (2C, C<sub>9</sub> & C<sub>12''</sub>); 124.64 (C<sub>4</sub>H); 125.42 (C<sub>10</sub>H); 124.13 (C<sub>7</sub>H); 122.30 (C<sub>6'</sub>); 121.39 (C<sub>12</sub>H); 115.50 (C<sub>3</sub>H); 105.30 (C<sub>1</sub>H); 100.94 (C<sub>6</sub>H); 69.75 (OC<sub>14</sub>H); 55.55 (OC<sub>13</sub>H<sub>3</sub>); 22.10 (2C, C<sub>15</sub>H<sub>3</sub>). **IR** (cm<sup>-1</sup>) (CCl<sub>4</sub>): 3055, 2979, 2929, 2855, 1622. **HRMS** (EI+) calcd for C<sub>22</sub>H<sub>20</sub>O<sub>2</sub> 316.1463, found: 316.1471.

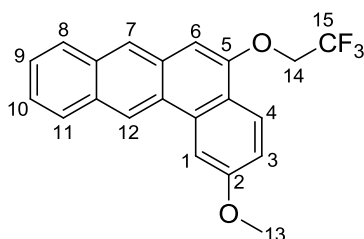

Compound **5d**: 2-methoxy-5-(2,2,2-trifluoroethoxy)benz(a)anthracene

Ketone **4a** (55.6 mg, 0.190 mmol, 1.0 eq) was dissolved in 2,2,2-trifluoroethanol (2.0 ml) containing H<sub>2</sub>SO<sub>4</sub> (1.0 M). The solution was refluxed. After 3 h, the reaction mixture was cooled down at room temperature and water (3mL) was added. The layers were separated and the aqueous phase extracted further with DCM three times (3 mL). The combined organic layers were dried over MgSO<sub>4</sub> and evaporated under reduced pressure. The crude residue was purified by column chromatography (Pentane/Ether from 100/0 to 80/20). The desired compound was obtained as a brown solid (31 mg, 8.7\*10<sup>-2</sup> mmol, 46 %).

**<sup>1</sup>H NMR** (δ, ppm) (CDCl<sub>3</sub>, 400 MHz): 8.94 (s, 1H, C<sub>12</sub>H); 8.24 (d, 1H, J = 8.8 Hz, C<sub>4</sub>H); 8.17 – 8.13 (m, 2H, C<sub>1</sub>H & C<sub>7</sub>H); 8.07 (d, 1H, J = 8.8 Hz, C<sub>11</sub>H); 7.96 (d, 1H, J = 7.4 Hz, C<sub>8</sub>H); 7.55 – 7.49 (m, 2H, C<sub>9</sub>H & C<sub>10</sub>H); 7.29 – 7.25 (m, 1H, C<sub>3</sub>H); 6.80 (s, 1H, C<sub>6</sub>H); 4.59 (q, 2H, J = 7.8 Hz, OC<sub>14</sub>H<sub>2</sub>); 4.06 (s, 3H, OC<sub>13</sub>H<sub>3</sub>). **<sup>13</sup>C NMR** (δ, ppm) (CDCl<sub>3</sub>, 100.6 MHz): 159.49 (C<sub>2</sub>O); 151.29 (C<sub>5</sub>O); 133.21 (C<sub>4'</sub>); 132.44 (C<sub>12'</sub>); 130.98 (C<sub>11'</sub>); 130.78 (C<sub>7'</sub>); 128.44 (C<sub>11</sub>H); 127.13 (C<sub>8</sub>H); 126.06 (C<sub>10</sub>H); 125.05 & 124.98 (C<sub>7</sub>H & C<sub>9</sub>H); 124.23 (C<sub>4</sub>H); 123.47 (q, J = 277.7 Hz, C<sub>15</sub>F<sub>3</sub>); 121.63 (C<sub>12</sub>H); 120.52 (C<sub>12''</sub>); 115.79 (C<sub>3</sub>H); 105.51 (C<sub>1</sub>H); 100.73 (C<sub>6</sub>H); 65.53 (q, J = 35.9 Hz, OC<sub>14</sub>H<sub>2</sub>); 55.55 (OC<sub>13</sub>H<sub>3</sub>). **IR** (cm<sup>-1</sup>) (CCl<sub>4</sub>): 3057, 2938, 2839, 1629, 1615, 1285. **HRMS** (EI+) calcd for C<sub>21</sub>H<sub>15</sub>F<sub>3</sub>O<sub>2</sub> 356.1024, found: 356.1027. **Mp**: 120 °C.

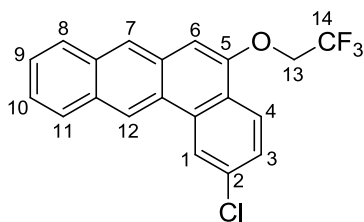

Compound **5e**: 2-chloro-5-(2,2,2-trifluoroethoxy)benz(a)anthracene

Ketone **4b** (90 mg, 0.296 mmol, 1.0 eq) and P-TSA (15 mg) were dissolved in 2,2,2-trifluoroethanol (3.0 ml). The solution was refluxed. After 3 h, the reaction mixture was cooled down at room temperature and water (4mL) was added. The layers were separated and the aqueous phase extracted further with DCM three times (4 mL). The combined organic layers were dried over MgSO<sub>4</sub> and evaporated under reduced pressure. The crude residue was purified by column chromatography (Pentane/Ether from 100/0 to 95/5). The desired compound was obtained as a yellow solid (69 mg, 0.192 mmol, 63 %).

**<sup>1</sup>H NMR** (δ, ppm) (CDCl<sub>3</sub>, 400 MHz): 8.80 (s, 1H, C<sub>12</sub>H); 8.57 (s, 1H, C<sub>1</sub>H); 8.16 (d, 1H, J = 8.7 Hz, C<sub>4</sub>H); 8.08 (s, 1H, C<sub>7</sub>H); 8.02 (d, 1H, J = 7.4 Hz, C<sub>11</sub>H); 7.94 (d, 1H, J = 8.2 Hz, C<sub>8</sub>H); 7.57 – 7.50 (m, 3H, C<sub>3</sub>H, C<sub>9</sub>H & C<sub>10</sub>H); 6.80 (s, 1H, C<sub>6</sub>H); 4.54 (q, 2H, J = 7.9 Hz, OC<sub>13</sub>H<sub>2</sub>). **<sup>13</sup>C NMR** (δ, ppm) (CDCl<sub>3</sub>, 100.6 MHz): 151.29 (C<sub>5</sub>O); 134.15 (C<sub>IV</sub>); 132.77 (C<sub>IV</sub>); 132.58 (C<sub>IV</sub>); 130.97 (C<sub>IV</sub>); 130.40 (C<sub>IV</sub>); 128.50 (C<sub>11</sub>H); 127.41 (CH); 127.14 (C<sub>8</sub>H); 126.40 (CH); 125.43(CH); 125.14 (C<sub>7</sub>H & C<sub>IV</sub>); 124.64 (C<sub>IV</sub>); 124.10 (C<sub>4</sub>H); 123.35 (q, J = 277.5 Hz, C<sub>14</sub>F<sub>3</sub>); 122.56 (C<sub>1</sub>H); 121.82 (C<sub>12</sub>H); 103.04 (C<sub>6</sub>H); 65.56 (q, J = 36.0 Hz, OC<sub>13</sub>H<sub>2</sub>). **IR** (cm<sup>-1</sup>) (CCl<sub>4</sub>): 3058, 2942, 2856, 1629. **HRMS** (EI+) calcd for C<sub>21</sub>H<sub>12</sub>F<sub>3</sub>ClO 360.0529, found: 360.0535. **Mp**: 87 °C.

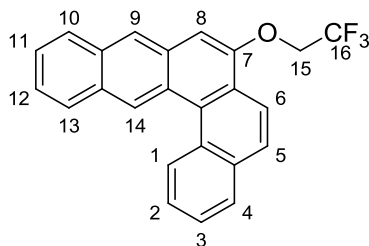

Compound **5f**: 7-(2,2,2-trifluoroethoxy)naphth(1,2-a)anthracene

Ketone **4c** (80 mg, 0.256 mmol, 1.0 eq) and P-TSA (12 mg) were dissolved in 2,2,2-trifluoroethanol (2.5 ml). The solution was refluxed. After 130 h, the reaction mixture was cooled down at room temperature and water (3 mL) was added. The layers were separated and the aqueous phase extracted further with DCM three times (3 mL). The combined organic layers were dried over MgSO<sub>4</sub> and evaporated under reduced pressure. The crude residue was purified by column chromatography (Pentane/Ether from 100/0 to 90/10). The desired compound was obtained as a yellow solid (91 mg, 0.242 mmol, 94 %).

**<sup>1</sup>H NMR** (δ, ppm) (CDCl<sub>3</sub>, 400 MHz): 9.48 (s, 1H, C<sub>14</sub>H); 9.21 (d, 1H, J = 8.4 Hz, C<sub>1</sub>H); 8.34 (d, 1H, J = 8.8 Hz, C<sub>6</sub>H); 8.31 (s, 1H, C<sub>9</sub>H); 8.10 (d, 1H, J = 7.9 Hz, C<sub>13</sub>H); 8.07 (dd, 1H, J<sub>1</sub> = 0.9 Hz, J<sub>2</sub> = 7.9 Hz, C<sub>4</sub>H); 8.03 – 8.01 (m, 1H, C<sub>10</sub>H); 8.00 (d, 1H, J = 9.0 Hz, C<sub>5</sub>H); 7.727 (ddd, 1H, J<sub>1</sub> = 1.4 Hz, J<sub>2</sub> = 6.9 Hz, J<sub>3</sub> = 8.5 Hz, C<sub>2</sub>H); 7.69 – 7.65 (m, 1H,

C<sub>3</sub>H); 7.59 – 7.51 (m, 2H, C<sub>11</sub>H & C<sub>12</sub>H); 7.11 (s, 1H, C<sub>8</sub>H); 4.65 (q, 2H, C<sub>15</sub>H<sub>2</sub>). <sup>13</sup>C NMR (δ, ppm) (CDCl<sub>3</sub>, 100.6 MHz): 151.12 (C<sub>7</sub>); 133.88 (C<sub>IV</sub>); 131.73 (C<sub>IV</sub>); 131.37 (C<sub>IV</sub>); 130.76 (C<sub>IV</sub>); 130.10 (C<sub>IV</sub>); 128.92 (C<sub>IV</sub>); 128.71(CH); 128.64(CH); 127.95(CH); 127.76(CH); 127.65(CH); 127.10(CH); 126.53(CH); 126.26(CH); 126.23(CH); 126.02 (C<sub>IV</sub>); 125.12(CH); 125.10 (C<sub>IV</sub>); 124.62(CH); 123.47 (q, J = 277.6 Hz, C<sub>15</sub>F<sub>3</sub>); 119.70 (C<sub>6</sub>H); 103.87 (C<sub>8</sub>H); 65.98 (q, J = 35.9 Hz, C<sub>15</sub>H<sub>2</sub>). IR (cm<sup>-1</sup>) (CCl<sub>4</sub>): 3055, 2927, 2855, 1631. HRMS (EI+) calcd for C<sub>24</sub>H<sub>15</sub>F<sub>3</sub>O 376.1075, found: 376.1076. Mp: 140 °C.

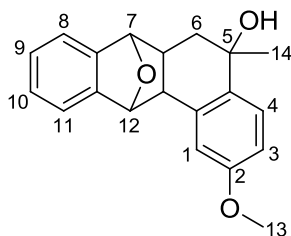

Compound **6a**: 7,12-epoxy-5,6,6A,7,12,12A-hexahydro-2-methoxy-5-methylbenz(a)anthrac-5-ol

To a solution of Ketone **4a** (100 mg, 0.342 mmol, 1.0 eq) in diethylether (3.5 ml) at 0 °C under a nitrogen atmosphere was added MeLi (1.7 mmol, 5.0 eq) dropwise. The solution was stirred for 1 h at 0 °C and for another hour at RT. The reaction mixture was quenched by addition of NH<sub>4</sub>Cl (sat. aq.) (5mL). The layers were separated and the aqueous phase extracted further with DCM three times (5 mL). The combined organic layers were dried over MgSO<sub>4</sub> and then evaporated. The crude residue was purified by two column chromatography (EP/AcOEt 70/30 and EP/AcOEt from 80 /20 to 75/25). The desired compound was obtained as a brown solid and 8 mg of the starting material were recovered (50 mg, 0.16 mmol, 48 % (52 %)).

<sup>1</sup>H NMR (δ, ppm) (CDCl<sub>3</sub>, 400 MHz): 7.58 (d, 1H, J = 8.6 Hz, C<sub>4</sub>H); 7.40 – 7.38 (m, 1H, C<sub>11</sub>H); 7.35 – 7.33 (m, 1H, C<sub>8</sub>H); 7.24 – 7.22 (m, 2H, C<sub>9</sub>H & C<sub>10</sub>H); 6.89 (d, 1H, J = 2.6 Hz, C<sub>1</sub>H); 6.85 (dd, 1H, J<sub>1</sub> = 2.7 Hz, J<sub>2</sub> = 8.6 Hz, C<sub>3</sub>H); 5.35 (s, 1H, OC<sub>12</sub>H); 5.23 (s, 1H, OC<sub>7</sub>H); 4.03 (s, 1H, OH); 3.86 (s, 3H, OC<sub>13</sub>H<sub>3</sub>); 3.09 (d, 1H, J = 8.5 Hz, C<sub>12</sub>H); 2.36 (ddd, 1H, J<sub>1</sub> = 4.0 Hz, J<sub>2</sub> = 7.4 Hz, J<sub>3</sub> = 8.3, C<sub>6</sub>H); 2.23 (dd, 1H, J<sub>1</sub> = 3.9 Hz, J<sub>2</sub> = 13.9 Hz, C<sub>6</sub>H<sub>2</sub>); 2.10 (dd, 1H, J<sub>1</sub> = 7.3 Hz, J<sub>2</sub> = 13.9 Hz, C<sub>6</sub>H<sub>2</sub>); 1.59 (s, 3H, C<sub>14</sub>H<sub>3</sub>). <sup>13</sup>C NMR (δ, ppm) (CDCl<sub>3</sub>, 100.6 MHz): 158.94 (C<sub>2</sub>O); 145.10 (C<sub>7</sub>); 144.37 (C<sub>11</sub>); 137.78 (C<sub>12</sub>); 136.05 (C<sub>4</sub>); 127.12 & 126.97 (C<sub>9</sub>H & C<sub>10</sub>H); 126.26 (C<sub>4</sub>H); 119.28 & 119.19 (C<sub>8</sub>H & C<sub>11</sub>H); 114.49 (C<sub>1</sub>H); 112.32 (C<sub>3</sub>H); 87.25 (OC<sub>7</sub>H); 85.70 (OC<sub>12</sub>H); 67.92 (C<sub>5</sub>); 55.36 (OC<sub>13</sub>H<sub>3</sub>); 44.45 (C<sub>12</sub>H); 41.39 (C<sub>6</sub>H<sub>2</sub>); 37.90 (C<sub>6</sub>H); 28.33 (C<sub>14</sub>H<sub>3</sub>). IR (cm<sup>-1</sup>) (CCl<sub>4</sub>): 2927, 2855, 1789, 1464.

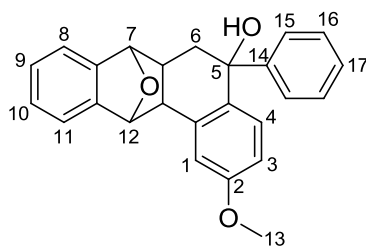

Compound **6b**: 7,12-epoxy-5,6,6A,7,12,12A-hexahydro-2-methoxy-5-phenylbenz(a)anthrac-5-ol

Following the general procedure **C**, the reaction was carried out with ketone **4a** (100 mg, 0.342 mmol). Purification by flash chromatography (EP/AcOEt: 90/10) gave the desired compound as an orange solid (60 mg, 0.162 mmol, 48 % (53 %)).

**<sup>1</sup>H NMR** ( $\delta$ , ppm) (CDCl<sub>3</sub>, 400 MHz): 7.41 – 7.36 (m, 3H, C<sub>11</sub>H & C<sub>16</sub>H); 7.33 – 7.30 (m, 3H, C<sub>8</sub>H & C<sub>15</sub>H); 7.27 – 7.25 (m, 1H, C<sub>17</sub>H); 7.24 – 7.21 (m, 2H, C<sub>9</sub>H & C<sub>10</sub>H); 6.99 (d, 1H,  $J$  = 8.6 Hz, C<sub>4</sub>H); 6.95 (d, 1H,  $J$  = 2.6 Hz, C<sub>1</sub>H); 6.73 (dd, 1H,  $J_1$  = 2.7 Hz,  $J_2$  = 8.7 Hz, C<sub>3</sub>H); 5.37 (s, 1H, OC<sub>12</sub>H); 5.29 (s, 1H, OC<sub>7</sub>H); 4.38 (s, 1H, OH); 3.86 (s, 3H, OC<sub>13</sub>H<sub>3</sub>); 3.14 (d, 1H,  $J$  = 8.4 Hz, C<sub>12</sub>H); 2.52 (dd, 1H,  $J_1$  = 7.1 Hz,  $J_2$  = 13.9 Hz, C<sub>6</sub>H<sub>2</sub>); 2.34 (dd, 1H,  $J_1$  = 4.2 Hz,  $J_2$  = 13.9 Hz, C<sub>6</sub>H<sub>2</sub>); 2.27 (ddd, 1H,  $J_1$  = 4.3 Hz,  $J_2$  = 7.2 Hz,  $J_3$  = 8.2 Hz, C<sub>6</sub>H). **<sup>13</sup>C NMR** ( $\delta$ , ppm) (CDCl<sub>3</sub>, 100.6 MHz): 159.06 (C<sub>2</sub>O); 146.83 (C<sub>14</sub>); 145.09 (C<sub>11'</sub>); 144.31 (C<sub>7'</sub>); 138.52 (C<sub>4'</sub>); 136.17 (C<sub>12''</sub>); 129.63 (C<sub>4</sub>H); 127.81 (2C, C<sub>16</sub>H); 127.13 (C<sub>17</sub>H); 126.99 & 126.65 (C<sub>9</sub>H & C<sub>10</sub>H); 126.49 (2C, C<sub>15</sub>H); 119.31 & 119.24 (C<sub>8</sub>H & C<sub>11</sub>H); 114.00 (C<sub>1</sub>H); 112.26 (C<sub>3</sub>H); 87.38 (OC<sub>7</sub>H); 85.56 (OC<sub>12</sub>H); 73.20 (C<sub>5</sub>); 55.35 (OC<sub>13</sub>H<sub>3</sub>); 44.35 (C<sub>12</sub>H); 43.07 (C<sub>6</sub>H<sub>2</sub>); 37.91 (C<sub>6</sub>H). Mp: 99 °C.

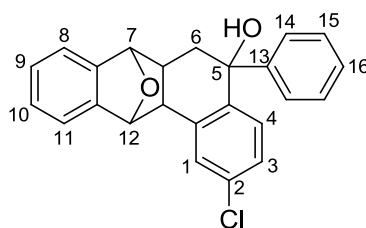

Compound **6c**: 2-chloro-7,12-epoxy-5,6,6A,7,12,12A-hexahydro-5-phenylbenz(a)anthrac-5-ol

Following the general procedure **C**, the reaction was carried out with ketone **4b** (55 mg, 0.185 mmol). Purification by flash chromatography (EP/AcOEt: from 90/10 to 75/25) gave the desired compound as a white solid (39.9 mg, 0.106 mmol, 57 %).

**<sup>1</sup>H NMR** ( $\delta$ , ppm) (CDCl<sub>3</sub>, 400 MHz): 7.46 (d, 1H,  $J$  = 1.9 Hz, C<sub>1</sub>H); 7.41 (dd, 1H,  $J_1$  = 1.5 Hz,  $J_2$  = 6.1 Hz, C<sub>11</sub>H), 7.33 – 7.20 (m, 8H, C<sub>8</sub>H, C<sub>9</sub>H, C<sub>10</sub>H, C<sub>14</sub>H, C<sub>15</sub>H & C<sub>16</sub>H); 7.16 (dd, 1H,  $J_1$  = 2.1 Hz,  $J_2$  = 8.4 Hz, C<sub>3</sub>H); 7.07 (d, 1H,  $J$  = 8.4 Hz, C<sub>4</sub>H); 5.34 (s, 1H, C<sub>12</sub>H); 5.31 (s, 1H, C<sub>7</sub>H); 4.35 (s, 1H, OH); 3.10 (d, 1H,  $J$  = 8.4 Hz, C<sub>12</sub>H); 2.53 (dd, 1H,  $J_1$  = 7.0 Hz,  $J_2$  = 13.9 Hz, C<sub>6</sub>H), 2.32 (dd, 1H,  $J_1$  = 5.0 Hz,  $J_2$  = 13.9 Hz, C<sub>6</sub>H); 2.27 – 2.21 (m, 1H, C<sub>6</sub>H). **<sup>13</sup>C NMR** ( $\delta$ , ppm) (CDCl<sub>3</sub>, 100.6 MHz): 145.94 (C<sub>IV</sub>); 144.78 (C<sub>IV</sub>); 144.11 (C<sub>IV</sub>); 142.10 (C<sub>IV</sub>); 139.02 (C<sub>IV</sub>); 133.52 (C<sub>IV</sub>); 129.67 (C<sub>4</sub>H); 128.67 (C<sub>1</sub>H); 127.97 (2C, C<sub>14</sub>H); 127.23 (CH); 127.10 (CH); 126.97 (CH); 126.90 (CH); 126.38 (2C, C<sub>15</sub>H); 87.00 (OC<sub>7</sub>H); 85.30 (OC<sub>12</sub>H); 73.26 (C<sub>5</sub>); 43.93 (C<sub>12</sub>H); 42.69 (C<sub>6</sub>H<sub>2</sub>); 37.83 (C<sub>6</sub>H).

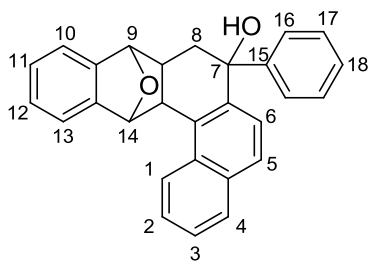

Compound **6d**: 9,14-epoxy-7,8,8A,9,14,14A-hexahydro-7-phenylnaphth(1,2-a)anthrac-7-ol

Following the general procedure **C**, the reaction was carried out with ketone **4c** (70 mg, 0.224 mmol). Purification by flash chromatography (EP/AcOEt: from 95/5 to 85/15) gave the desired compound as a white solid (64.2 mg, 0.164 mmol, 73 %).

**<sup>1</sup>H NMR** ( $\delta$ , ppm) (CDCl<sub>3</sub>, 400 MHz): 8.14 (d, 1H,  $J$  = 8.5 Hz, C<sub>1</sub>H); 7.89 (d, 1H,  $J$  = 8.0 Hz, C<sub>4</sub>H); 7.70 (t, 1H,  $J$  = 7.6 Hz, C<sub>2</sub>H); 7.64 (d, 1H,  $J$  = 8.7 Hz, C<sub>5</sub>H); 7.60 – 7.57 (m, 2H, C<sub>3</sub>H & C<sub>13</sub>H); 7.53 – 7.51 (m, 2H); 7.435 – 7.29 (m, 6H); 7.08 (d, 1H,  $J$  = 8.7 Hz, C<sub>6</sub>H); 5.56 (s, 1H, OC<sub>14</sub>H); 5.16 (s, 1H, OC<sub>9</sub>H); 5.1 (s, 1H, OH); 4.04 (d, 1H,  $J$  = 8.1 Hz, C<sub>14</sub>H); 2.61 – 2.54 (m, 3H, C<sub>8</sub>H<sub>2</sub> & C<sub>8</sub>H). **<sup>13</sup>C NMR** ( $\delta$ , ppm) (CDCl<sub>3</sub>, 100.6 MHz): 147.40 (C<sub>IV</sub>); 145.29 (C<sub>IV</sub>); 143.84 (C<sub>IV</sub>); 140.68 (C<sub>IV</sub>); 133.41 (C<sub>IV</sub>); 132.07 (C<sub>IV</sub>); 131.56 (C<sub>IV</sub>); 129.52 (C<sub>IV</sub>); 129.19 (C<sub>4</sub>H); 127.81 (2C, C<sub>16</sub>H); 127.35 (CH); 127.18 (CH); 127.06 (CH); 126.97 (CH); 126.78 (CH); 126.53 (CH); 126.46 (2C, C<sub>17</sub>H); 125.81 (CH); 123.11 (C<sub>1</sub>H); 119.36 (CH); 119.23 (CH); 115.27 (C<sub>IV</sub>); 86.24 & 86.16 (OC<sub>9</sub>H & OC<sub>14</sub>H); 73.47 (C<sub>7</sub>); 42.41 (C<sub>8</sub>H<sub>2</sub>); 40.17 (C<sub>16</sub>H); 37.76 (C<sub>8</sub>H). **HRMS** (EI+) calcd for C<sub>28</sub>H<sub>22</sub>O<sub>2</sub> 390.1620, found: 390.1620. Mp: 64 °C.

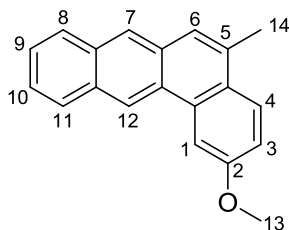

Compound **7a**: 2-methoxy-5-(methyl)benz(a)anthracene

Alcohol **6a** (36.0 mg, 0.117 mmol, 1.0 eq) was dissolved in EtOH (3.0 ml) containing H<sub>2</sub>SO<sub>4</sub> (1.0 M). The solution was refluxed. After 12 h, the reaction mixture was cooled down at room temperature and water (3 mL) was added. The precipitate was filtrated, dissolved in DCM and dried over MgSO<sub>4</sub>. The solvent was evaporated under reduced pressure and the crude residue was dissolved in acetonitrile. This solution was washed with pentane and the solvent was evaporated under reduced pressure. The desired product was obtained as a brown solid (24 mg,  $8.8 \times 10^{-2}$  mmol, 75 %).

<sup>1</sup>H NMR (δ, ppm) (CDCl<sub>3</sub>, 400 MHz): 9.03 (s, 1H, C<sub>12</sub>H); 8.26 (d, 1H, J = 2.5 Hz, C<sub>1</sub>H); 8.23 (s, 1H, C<sub>7</sub>H); 8.10 (dd, 1H, J<sub>1</sub> = 4.1 Hz, J<sub>2</sub> = 5.4 Hz, C<sub>11</sub>H); 8.01 (dd, 1H, J<sub>1</sub> = 4.1 Hz, J<sub>2</sub> = 5.4 Hz, C<sub>8</sub>H); 7.94 (d, 1H, J = 8.8 Hz, C<sub>4</sub>H); 7.54 – 7.51 (m, 2H, C<sub>9</sub>H & C<sub>10</sub>H); 7.49 (s, 1H, C<sub>6</sub>H); 7.28 (dd, 1H, J<sub>1</sub> = 2.6 Hz, J<sub>2</sub> = 8.9 Hz, C<sub>3</sub>H); 4.07 (s, 3H, OC<sub>13</sub>H<sub>3</sub>); 2.68 (s, 3H, C<sub>14</sub>H<sub>3</sub>). <sup>13</sup>C NMR (δ, ppm) (CDCl<sub>3</sub>, 100.6 MHz): 158.33 (C<sub>2</sub>O); 132.27 & 132.15 & 132.06 & 131.27 & 131.10 (C<sub>4'</sub> & C<sub>5</sub> & C<sub>7'</sub> & C<sub>11'</sub> & C<sub>12'</sub>); 128.40 (C<sub>11</sub>H); 128.27 (C<sub>12'</sub>H); 127.52 (C<sub>8</sub>H); 126.63 (C<sub>6'</sub>); 126.16 & 125.67 & 125.52 & 125.14 (C<sub>4</sub>H & C<sub>7</sub>H & C<sub>9</sub>H & C<sub>10</sub>H); 124.46 (C<sub>12</sub>H); 121.34 (C<sub>3</sub>H); 115.54 (C<sub>1</sub>H); 105.83 (C<sub>6</sub>H); 55.54(OC<sub>13</sub>H<sub>3</sub>); 20.24 (C<sub>14</sub>H<sub>3</sub>). IR (cm<sup>-1</sup>) (CCl<sub>4</sub>): 3057, 2929, 1613, 1514. HRMS (EI+) calcd for C<sub>20</sub>H<sub>16</sub>O 272.1201, found: 272.1200. Mp: 107 °C.

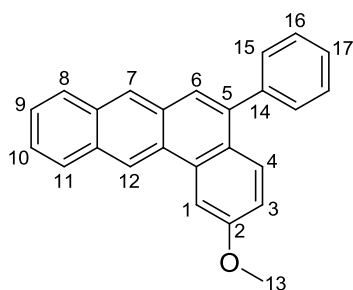

Compound **7b**: 2-methoxy-5-phenylbenz(a)anthracene

Alcohol **6b** (56.0 mg, 0.151 mmol, 1.0 eq) was dissolved in EtOH (1.5 ml) containing H<sub>2</sub>SO<sub>4</sub> (1.0 M). The solution was refluxed. After 6 h, the reaction mixture was cooled down at room temperature and water (2mL) was added. The precipitate was filtrated, dissolved in DCM and dried over MgSO<sub>4</sub>. The solvent was evaporated under reduced pressure and the crude residue was dissolved in acetonitrile. This solution was washed with pentane and the solvent was evaporated under reduced pressure. The crude residue was purified by column

chromatography (EP/AcOEt: 90/10). The desired product was obtained as a brown solid (29 mg,  $8.7 \times 10^{-2}$  mmol, 57 %).

**$^1\text{H}$  NMR** ( $\delta$ , ppm) ( $\text{CDCl}_3$ , 400 MHz): 9.11 (s, 1H,  $\text{C}_{12}\text{H}$ ); 8.35 (s, 1H,  $\text{C}_7\text{H}$ ); 8.33 (d, 1H,  $J = 2.5$  Hz,  $\text{C}_1\text{H}$ ); 8.15 – 8.13 (m, 1H,  $\text{C}_{11}\text{H}$ ); 8.05 – 8.02 (m, 1H,  $\text{C}_8\text{H}$ ); 7.81 (d, 1H,  $J = 8.9$  Hz,  $\text{C}_4\text{H}$ ); 7.61 (s, 1H,  $\text{C}_6\text{H}$ ); 7.59 – 7.51 (m, 6H,  $\text{C}_9\text{H}$ ,  $\text{C}_{10}\text{H}$ ,  $\text{C}_{15}\text{H}$  &  $\text{C}_{16}\text{H}$ ); 7.49 – 7.45 (m, 1H,  $\text{C}_{17}\text{H}$ ), 7.18 (dd, 1H,  $J_1 = 2.6$  Hz,  $J_2 = 8.9$  Hz,  $\text{C}_3\text{H}$ ); 4.08 (s, 3H,  $\text{OC}_{13}\text{H}_3$ ).  **$^{13}\text{C}$  NMR** ( $\delta$ , ppm) ( $\text{CDCl}_3$ , 100.6 MHz): 158.50 ( $\text{C}_2\text{O}$ ); 140.88 ( $\text{C}_{\text{IV}}$ ); 138.54 ( $\text{C}_4'$ ); 132.38 ( $\text{C}_{\text{IV}}$ ); 132.27 ( $\text{C}_{\text{IV}}$ ); 131.70 ( $\text{C}_{\text{IV}}$ ); 130.62 ( $\text{C}_{\text{IV}}$ ); 129.89 (2C,  $\text{C}_{15}\text{H}$ ); 128.57 (CH); 128.46 (CH); 128.30 (2C,  $\text{C}_{16}\text{H}$ ); 128.26 ( $\text{C}_{\text{IV}}$ ); 127.63 (CH); 127.35 ( $\text{C}_{17}\text{H}$ ); 126.74 ( $\text{C}_7\text{H}$ ); 125.86 (CH); 125.6 ( $\text{C}_{\text{IV}}$ ); 125.52 (CH); 125.39 ( $\text{C}_6\text{H}$ ); 121.45 ( $\text{C}_{12}\text{H}$ ); 115.53 ( $\text{C}_3\text{H}$ ); 105.81 ( $\text{C}_1\text{H}$ ); 55.60 ( $\text{OC}_{13}\text{H}_3$ ).

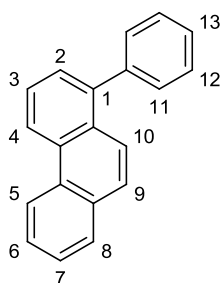

#### Compound **8a**: 1-phenylphenanthrene

Alcohol **6d** (44 mg, 0.11 mmol, 1.0 eq) and P-TSA (5 mg) were refluxed in EtOH (1.2 ml). After 11h, the reaction mixture was cooled down at RT and water (2 mL) was added. The layers were separated and the aqueous phase extracted further with DCM three times (3 mL). The combined organic layers were dried over  $\text{MgSO}_4$  and then evaporated. The crude residue was purified by column chromatography (EP/AcOEt: from 100/0 to 95/5). The product was obtained as a white solid (23 mg,  $9.1 \times 10^{-2}$  mmol, 81 %).

**$^1\text{H}$  NMR** ( $\delta$ , ppm) ( $\text{CDCl}_3$ , 400 MHz): 8.81 (d, 1H,  $J = 8.2$  Hz,  $\text{C}_5\text{H}$ ); 8.80 (d, 1H,  $J = 8.3$  Hz,  $\text{C}_4\text{H}$ ); 7.90 (d, 1H,  $J = 7.6$  Hz,  $\text{C}_8\text{H}$ ); 7.84 (d, 1H,  $J = 9.2$  Hz,  $\text{C}_{9/10}\text{H}$ ); 7.74 – 7.68 (m, 3H,  $\text{C}_3\text{H}$ ,  $\text{C}_6\text{H}$  &  $\text{C}_{9/10}\text{H}$ ); 7.69 – 7.65 (m, 1H,  $\text{C}_7\text{H}$ ); 7.58 (d, 1H,  $J = 7.1$  Hz,  $\text{C}_2\text{H}$ ); 7.54 – 7.53 (m, 4H,  $\text{C}_{11}\text{H}$  &  $\text{C}_{12}\text{H}$ ); 7.50 – 7.45 (m, 1H,  $\text{C}_{14}\text{H}$ ).  **$^{13}\text{C}$  NMR** ( $\delta$ , ppm) ( $\text{CDCl}_3$ , 100.6 MHz): 141.07 ( $\text{C}_{\text{IV}}$ ); 140.97 ( $\text{C}_{\text{IV}}$ ); 131.69 ( $\text{C}_{\text{IV}}$ ); 130.64 ( $\text{C}_{\text{IV}}$ ); 130.37 ( $\text{C}_{\text{IV}}$ ); 130.19 (2C,  $\text{C}_{13}\text{H}$ ); 129.88 ( $\text{C}_{\text{IV}}$ ); 128.43 ( $\text{C}_8\text{H}$ ); 128.24 (2C,  $\text{C}_{12}\text{H}$ ); 127.86 ( $\text{C}_{14}\text{H}$ ); 127.21 ( $\text{C}_7\text{H}$ ); 126.83 (CH); 126.66 (CH); 126.62 (CH); 125.92 (CH); 124.57 ( $\text{C}_{9/10}\text{H}$ ); 122.93 ( $\text{C}_5\text{H}$ ); 122.10 ( $\text{C}_4\text{H}$ ). **IR** ( $\text{cm}^{-1}$ ) ( $\text{CCl}_4$ ): 3061, 2927, 2855, 1455. **HRMS** (EI+) calcd for  $\text{C}_{20}\text{H}_{14}$  254.1096, found: 254.1095. **Mp**: 75 °C.



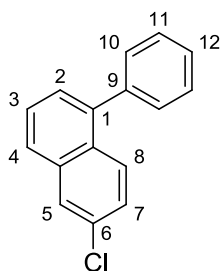

Compound **8b**: 6-chloro-1-phenylnaphthalene

Alcohol **6c** (38 mg, 0.10 mmol, 1.0 eq) and P-TSA (5 mg) were refluxed in EtOH (1.2 ml). After 30 h, the reaction mixture was cooled down at RT and water (2 mL) was added. The layers were separated and the aqueous phase extracted further with DCM three times (3 mL). The combined organic layers were dried over MgSO<sub>4</sub> and then evaporated. The crude residue was purified by column chromatography (EP/AcOEt: from 100/0 to 90/10). The product was obtained as a transparent oil (22 mg,  $9.1 \times 10^{-2}$  mmol, 90 %).

**<sup>1</sup>H NMR** ( $\delta$ , ppm) (CDCl<sub>3</sub>, 400 MHz): 7.89 (d, 1H,  $J = 2.1$  Hz, C<sub>5</sub>H); 7.84 (d, 1H,  $J = 9.1$  Hz, C<sub>8</sub>H); 7.77 (d, 1H,  $J = 8.2$  Hz, C<sub>4</sub>H); 7.55 (dd, 1H,  $J_1 = 7.2$  Hz,  $J_2 = 8.1$  Hz, C<sub>3</sub>H); 7.53 – 7.45 (m, 5H, C<sub>10</sub>H, C<sub>11</sub>H & C<sub>12</sub>H); 7.42 (dd, 1H,  $J_1 = 1.1$  Hz,  $J_2 = 7.0$  Hz, C<sub>2</sub>H); 7.36 (dd, 1H,  $J_1 = 2.2$  Hz,  $J_2 = 9.1$  Hz, C<sub>7</sub>H). **<sup>13</sup>C NMR** ( $\delta$ , ppm) (CDCl<sub>3</sub>, 100.6 MHz): 140.41 (C<sub>IV</sub>); 140.21 (C<sub>IV</sub>); 134.48 (C<sub>IV</sub>); 131.62 (C<sub>IV</sub>); 129.94 (2C, C<sub>10</sub>H); 129.91 (C<sub>6</sub>); 128.35 (2C, C<sub>11</sub>H); 127.85 (CH); 127.47 (CH); 127.11 (CH); 126.81 (2CH); 126.73 (CH); 126.54 (CH). **IR** (cm<sup>-1</sup>) (CCl<sub>4</sub>): 3060, 2927, 2855, 1590. **HRMS** (EI+) calcd for C<sub>16</sub>H<sub>11</sub>Cl 238.0549, found: 238.0548.

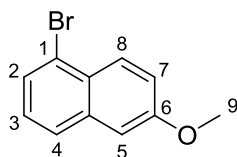

Compound **8c**: 1-bromo-6-methoxynaphthalene

To a solution of ketone **4a** (50 mg, 0.17 mmol, 1.0 eq) in toluene (1.7 ml) at 0 °C under a nitrogen atmosphere was added PBr<sub>3</sub> (80  $\mu$ L, 0.86 mmol, 5.0 eq) dropwise. The solution was refluxed for 16 h. The reaction mixture was cooled down at RT and water (3 mL) was added. The solution was washed with NaHCO<sub>3</sub> (sat. aq.) (3 mL). The layers were separated and the aqueous phase extracted further with DCM three times (3 mL). The combined organic layers were dried over MgSO<sub>4</sub> and then evaporated. The crude residue was purified by

column chromatography (EP/AcOEt 90/10). The product was obtained as a yellowish oil (17 mg,  $7.2 \times 10^{-2}$  mmol, 44 %).

**$^1\text{H}$  NMR** ( $\delta$ , ppm) ( $\text{CDCl}_3$ , 400 MHz): 8.14 (d, 1H,  $J = 9.2$  Hz,  $\text{C}_8\text{H}$ ); 7.69 (d, 1H,  $J = 8.2$  Hz,  $\text{C}_2\text{H}$  ou  $\text{C}_4\text{H}$ ); 7.62 (dd, 1H,  $J_1 = 1.0$  Hz,  $J_2 = 7.4$  Hz,  $\text{C}_2\text{H}$  ou  $\text{C}_4\text{H}$ ); 7.27 (dd,  $J_1 = 7.7$  Hz,  $J_2 = 8.0$  Hz,  $\text{C}_3\text{H}$ ); 7.24 (dd, 1H,  $J_1 = 2.4$  Hz,  $J_2 = 9.3$  Hz,  $\text{C}_7\text{H}$ ); 7.12 (d, 1H,  $J = 2.5$  Hz,  $\text{C}_5\text{H}$ ); 3.93 (s, 3H,  $\text{OC}_9\text{H}_3$ ).  **$^{13}\text{C}$  NMR** ( $\delta$ , ppm) ( $\text{CDCl}_3$ , 100.6 MHz): 158.12 ( $\text{C}_6\text{O}$ ); 135.84 ( $\text{C}_{4'}$ ); 128.73 ( $\text{C}_8\text{H}$ ); 127.57 ( $\text{C}_2\text{H}$  ou  $\text{C}_4\text{H}$ ); 127.43 ( $\text{C}_8'$ ); 126.75 ( $\text{C}_3\text{H}$ ); 126.70 ( $\text{C}_2\text{H}$  ou  $\text{C}_4\text{H}$ ); 122.64 ( $\text{C}_1\text{Br}$ ); 119.96 ( $\text{C}_7\text{H}$ ); 106.06 ( $\text{C}_5\text{H}$ ); 55.40 ( $\text{OC}_9\text{H}_3$ ). **IR** ( $\text{cm}^{-1}$ ) ( $\text{CCl}_4$ ): 3059, 3006, 2958, 2937, 2838, 1625. **HRMS** ( $\text{EI}^+$ ) calcd for  $\text{C}_{11}\text{H}_9\text{BrO}$  235.9837, found: 235.9835.

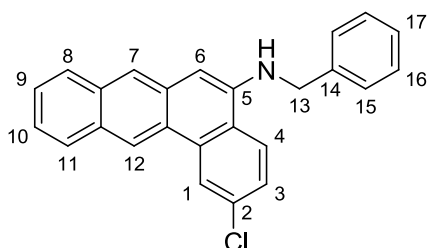

#### Compound **9b**: N-benzyl-2-chlorotetraphen-5-amine

To a solution of ketone **4b** (70 mg, 0.24 mmol, 1.0 eq) and benzylamine (29  $\mu\text{L}$ , 0.26 mmol, 1.1 eq) in chlorobenzene (1.2 mL) at 0 °C under a nitrogen atmosphere was added  $\text{TiCl}_4$  (16  $\mu\text{L}$ , 0.14 mmol, 0.6 eq) dropwise. After 16 h at RT,  $\text{H}_2\text{SO}_4$  (60  $\mu\text{L}$ ) and  $\text{TiCl}_4$  (32  $\mu\text{L}$ , 0.28 mmol, 1.2 eq) were added to the crude mixture at 0 °C. The solution was warmed at 80 °C for 3 h. The reaction mixture was cooled down at RT and water (2 mL) was added. The solution was filtrated and the crude residue was purified by column chromatography (EP/AcOEt: from 95/5 to 90/10). The product was obtained as a yellowish solid (11 mg,  $3.0 \times 10^{-2}$  mmol, 12 %).

**$^1\text{H}$  NMR** ( $\delta$ , ppm) ( $\text{CDCl}_3$ , 400 MHz): 8.92 (s 1H,  $\text{C}_{12}\text{H}$ ); 8.79 (d, 1H,  $J = 2.0$  Hz,  $\text{C}_4\text{H}$ ); 8.08 (s, 1H,  $\text{C}_7\text{H}$ ); 8.03 (d, 1H,  $J = 8.1$  Hz,  $\text{C}_{11}\text{H}$ ); 7.91 (d, 1H,  $J = 7.9$  Hz,  $\text{C}_8\text{H}$ ); 7.81 (d, 1H,  $J = 8.7$  Hz,  $\text{C}_1\text{H}$ ); 7.57 (dd, 1H,  $J_1 = 1.8$  Hz,  $J_2 = 8.6$  Hz,  $\text{C}_3\text{H}$ ); 7.53 – 7.40 (m, 6H,  $\text{C}_9\text{H}$ ,  $\text{C}_{10}\text{H}$ ,  $\text{C}_{15}\text{H}$  &  $\text{C}_{16}\text{H}$ ); 7.37 – 7.33 (m, 1H,  $\text{C}_{17}$ ); 6.85 (s, 1H,  $\text{C}_6\text{H}$ ); 4.58 (s, 3H,  $\text{NC}_{13}\text{H}_2$  & NH).  **$^{13}\text{C}$  NMR** ( $\delta$ , ppm) ( $\text{CDCl}_3$ , 100.6 MHz): 140.04 ( $\text{C}_{\text{IV}}$ ); 138.65 ( $\text{C}_{\text{IV}}$ ); 133.11 ( $\text{C}_{\text{IV}}$ ); 132.99 ( $\text{C}_{\text{IV}}$ ); 132.84 ( $\text{C}_{\text{IV}}$ ); 130.07 ( $\text{C}_{\text{IV}}$ ); 128.83 (2C,  $\text{C}_{15}\text{H}$ ); 128.52 ( $\text{C}_{11}\text{H}$ ); 127.96 (2C,  $\text{C}_{16}\text{H}$ ); 127.63 ( $\text{C}_{17}\text{H}$ ); 127.04 ( $\text{C}_3\text{H}$ ); 126.92 ( $\text{C}_8\text{H}$ ); 126.07 ( $\text{C}_9\text{H}$ ); 124.90 ( $\text{C}_{\text{IV}}$ ); 124.63 ( $\text{C}_{\text{IV}}$ ); 124.35 ( $\text{C}_{10}\text{H}$ ); 123.49 ( $\text{C}_4\text{H}$ ); 123.42 ( $\text{C}_7\text{H}$ ); 122.03 ( $\text{C}_1\text{H}$ ); 121.64 ( $\text{C}_{12}\text{H}$ ); 102.13 ( $\text{C}_6\text{H}$ ); 48.70 ( $\text{NC}_{13}\text{H}_2$ ). **IR** ( $\text{cm}^{-1}$ ) ( $\text{CCl}_4$ ): 3059, 2928, 2856, 1623. **HRMS** ( $\text{EI}^+$ ) calcd for  $\text{C}_{25}\text{H}_{18}\text{NCl}$  367.1128, found: 367.1132.

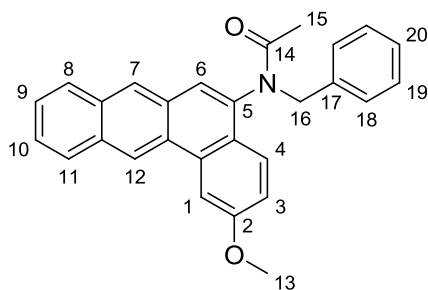

**Compound 10:** N-benzyl-N-(2-methoxytetraphen-5-yl)acetamide

To a solution of ketone **4a** (70 mg, 0.24 mmol, 1.0 eq) and benzylamine (29  $\mu$ L, 0.26 mmol, 1.1 eq) in chlorobenzene (1.2 mL) at 0 °C under a nitrogen atmosphere was added  $\text{TiCl}_4$  (16  $\mu$ L, 0.14 mmol, 0.6 eq) dropwise. After 12 h at RT,  $\text{H}_2\text{SO}_4$  (60  $\mu$ L) and  $\text{TiCl}_4$  (32  $\mu$ L, 0.28 mmol, 1.2 eq) were added to the crude mixture at 0 °C. The solution was warmed at 80 °C for 3 h. The reaction mixture was cooled down at RT and water (2mL) was added. The layers were separated and the aqueous phase extracted further with DCM three times (3 mL). The combined organic layers were dried over  $\text{MgSO}_4$  and concentrated under reduced pressure. The crude was directly treated with acetic anhydride (190 $\mu$ L). The reaction was stirred for 2.5 h at RT then water (3 mL) was added. The layers were separated and the aqueous phase extracted further with DCM three times (3 mL). The combined organic layers were dried over  $\text{MgSO}_4$  and concentrated under reduced pressure. The crude residue was purified by column chromatography (EP/AcOEt: from 95/5 to 80/20). The product was obtained as a strong yellow solid (19.6 mg,  $4.8 \times 10^{-2}$  mmol, 20 %).

**$^1\text{H}$  NMR** ( $\delta$ , ppm) ( $\text{CDCl}_3$ , 400 MHz): 9.07 (s, 1H,  $\text{C}_{12}\text{H}$ ); 8.29 (d, 1H,  $J = 2.4$  Hz,  $\text{C}_1\text{H}$ ); 8.16 (s, 1H,  $\text{C}_7\text{H}$ ); 8.14 – 8.12 (m, 1H,  $\text{C}_{11}\text{H}$ ); 7.99 – 7.96 (m, 1H,  $\text{C}_8\text{H}$ ); 7.73 (d, 1H,  $J = 8.9$  Hz,  $\text{C}_4\text{H}$ ); 7.59 – 7.53 (m, 2H,  $\text{C}_9\text{H}$  &  $\text{C}_{10}\text{H}$ ); 7.29 – 7.25 (m, 6H,  $\text{C}_3\text{H}$ ,  $\text{C}_{18}\text{H}$ ,  $\text{C}_{19}\text{H}$  &  $\text{C}_{20}\text{H}$ ); 7.13 (s, 1H,  $\text{C}_6\text{H}$ ); 5.74 (d, 1H,  $J = 14.0$  Hz,  $\text{NC}_{16}\text{H}_2$ ); 4.21 (d, 1H,  $J = 14.0$  z,  $\text{NC}_{16}\text{H}_2$ ); 4.09 (s, 3H,  $\text{OC}_{13}\text{H}_3$ ); 1.93 (s, 3H,  $\text{C}_{15}\text{H}_3$ ).  **$^{13}\text{C}$  NMR** ( $\delta$ , ppm) ( $\text{CDCl}_3$ , 100.6 MHz): 171.34 ( $\text{C}_{14}\text{O}$ ); 159.34 ( $\text{C}_2$ ); 137.73 ( $\text{C}_{\text{IV}}$ ); 136.79 ( $\text{C}_{\text{IV}}$ ); 133.64 ( $\text{C}_{\text{IV}}$ ); 132.15 ( $\text{C}_{\text{IV}}$ ); 132.08 ( $\text{C}_{\text{IV}}$ ); 129.90 ( $\text{C}_{\text{IV}}$ ); 129.35 (2C,  $\text{C}_{18}\text{H}$ ); 128.41 ( $\text{C}_{11}\text{H}$ ); 128.33 (2C,  $\text{C}_{19}\text{H}$ ); 127.89 ( $\text{C}_{\text{IV}}$ ); 127.61 ( $\text{C}_8\text{H}$ ); 127.48 ( $\text{C}_3\text{H}$ ); 127.37 ( $\text{C}_7\text{H}$ ); 126.32 & 126.19 ( $\text{C}_9\text{H}$  &  $\text{C}_{10}\text{H}$ ); 125.55 ( $\text{C}_6\text{H}$ ); 124.87 ( $\text{C}_4\text{H}$ ); 123.07 ( $\text{C}_{\text{IV}}$ ); 121.70 ( $\text{C}_{12}\text{H}$ ); 116.36 ( $\text{C}_{20}\text{H}$ ); 106.51 ( $\text{C}_{1\text{H}}$ ); 55.67 ( $\text{OC}_{13}\text{H}_3$ ); 51.91 ( $\text{NC}_{16}\text{H}_2$ ); 22.24 ( $\text{C}_{15}\text{H}_3$ ). **IR** ( $\text{cm}^{-1}$ ) ( $\text{CCl}_4$ ): 2927, 2855, 1686, 1622. **HRMS** (EI+) calcd for  $\text{C}_{28}\text{H}_{23}\text{NO}_2$  405.1729, found: 405.1719. **Mp**: 130°C.

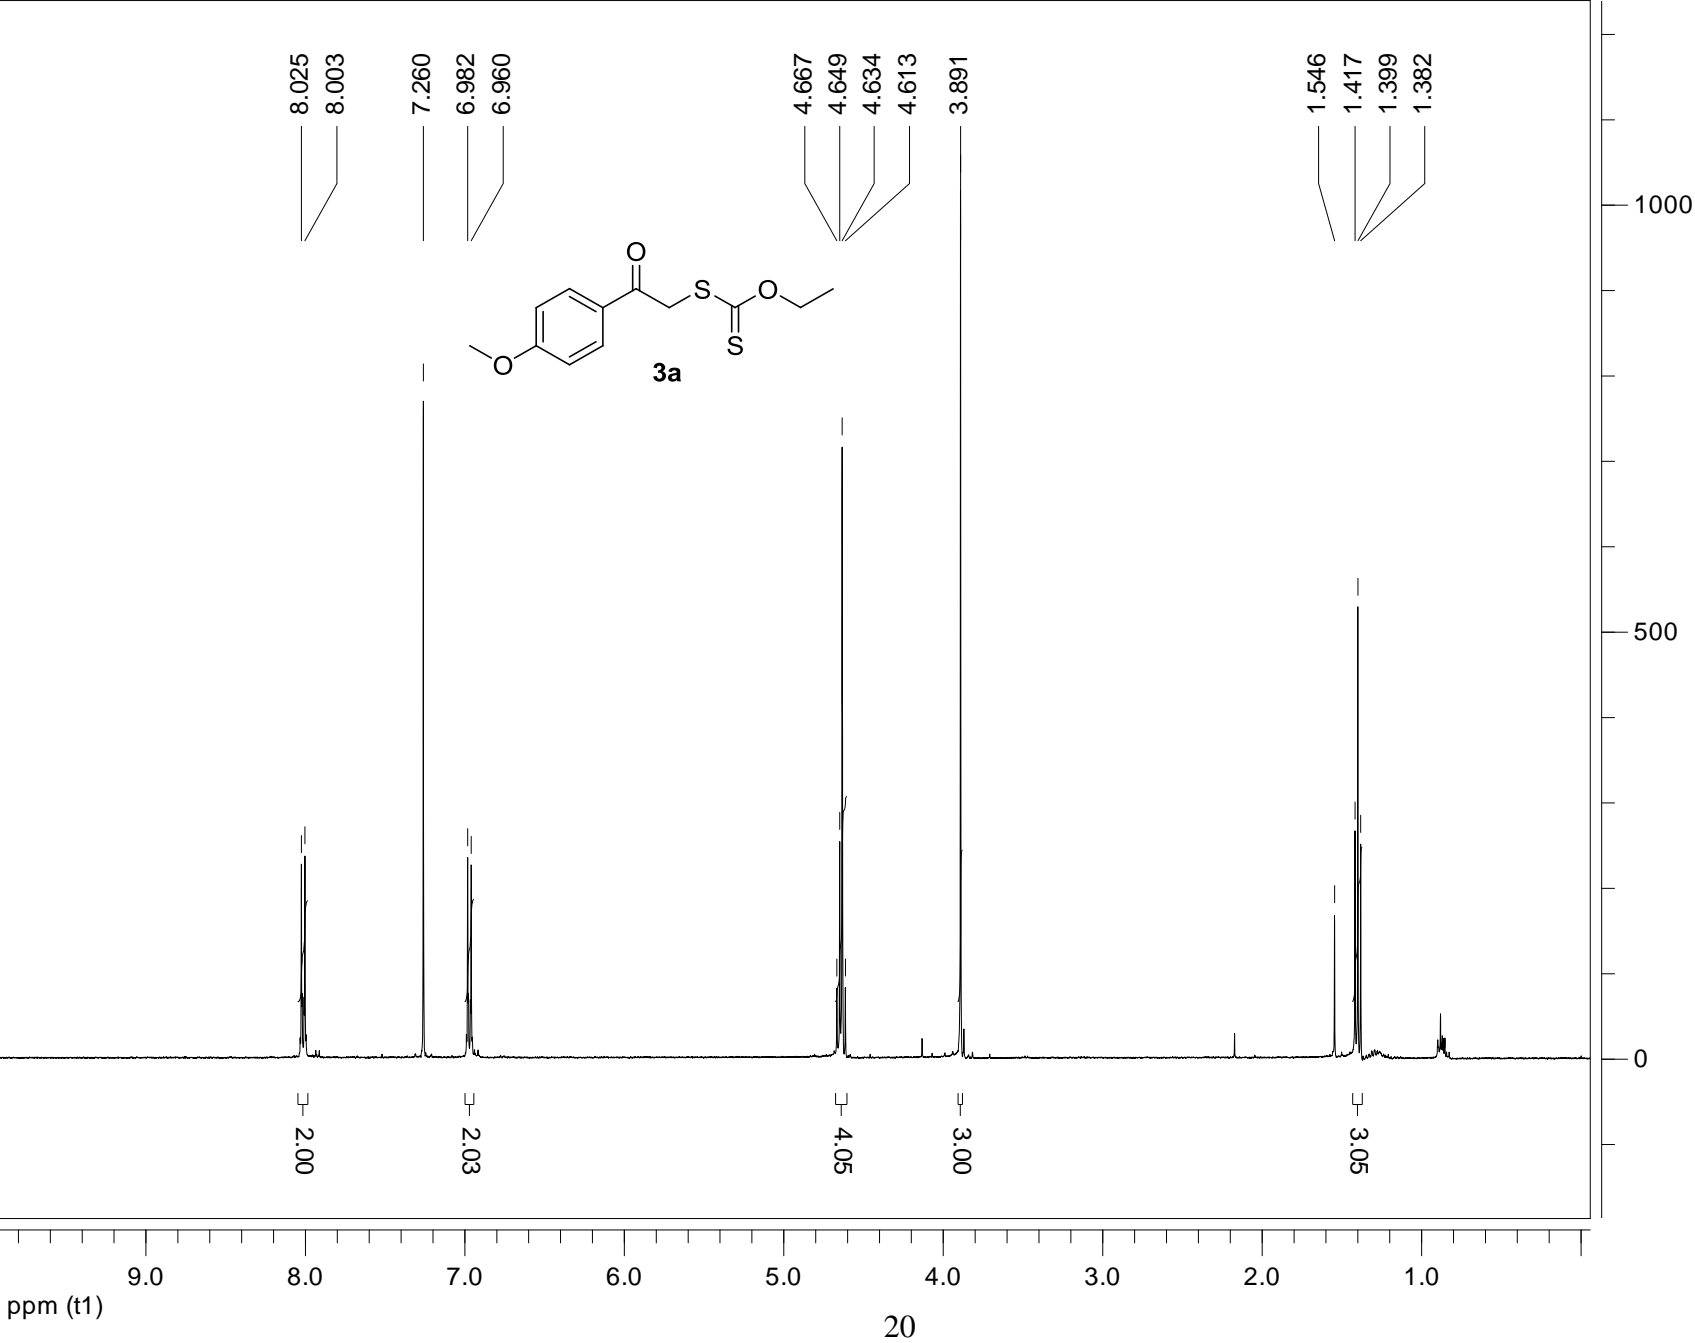

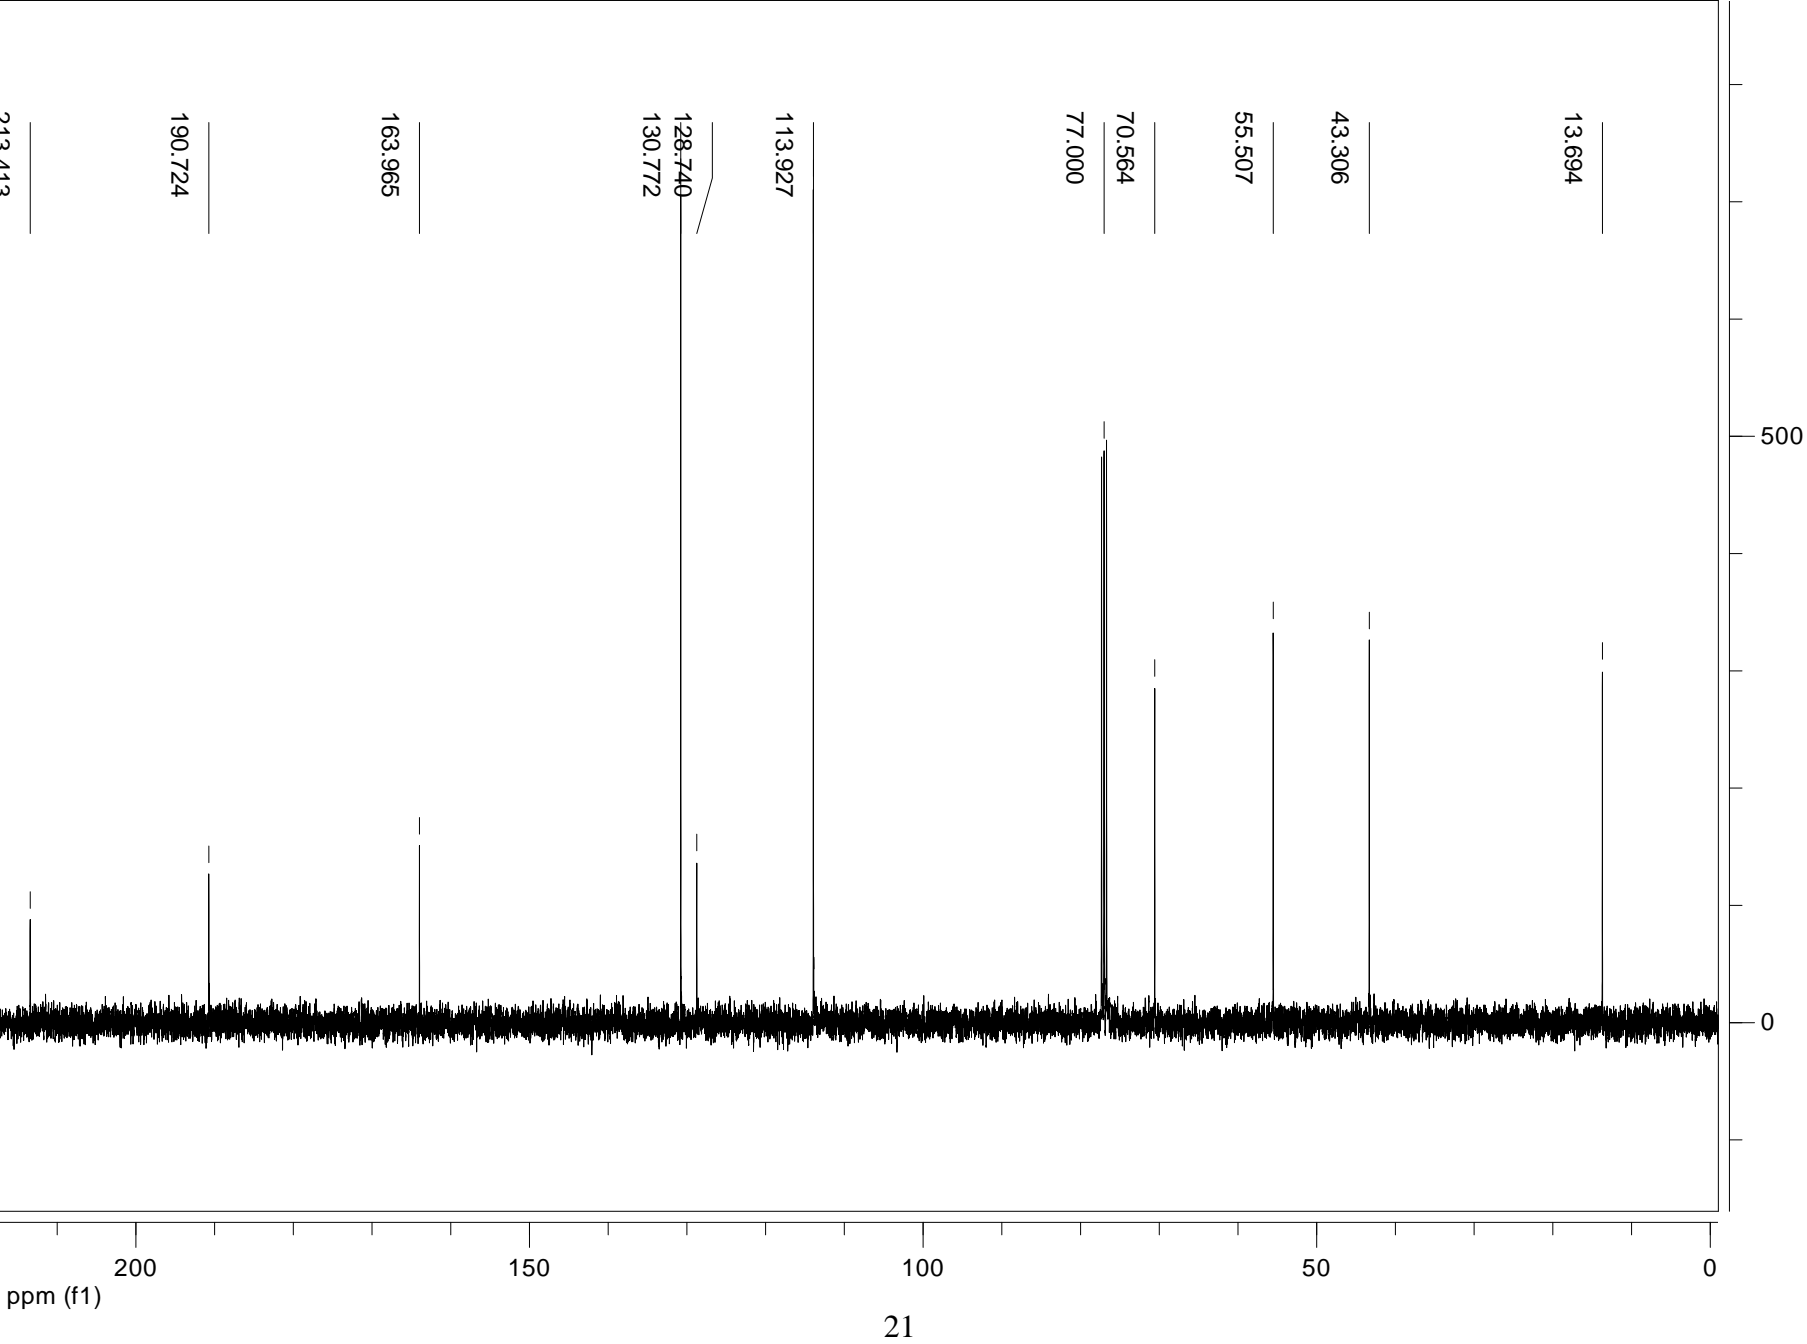

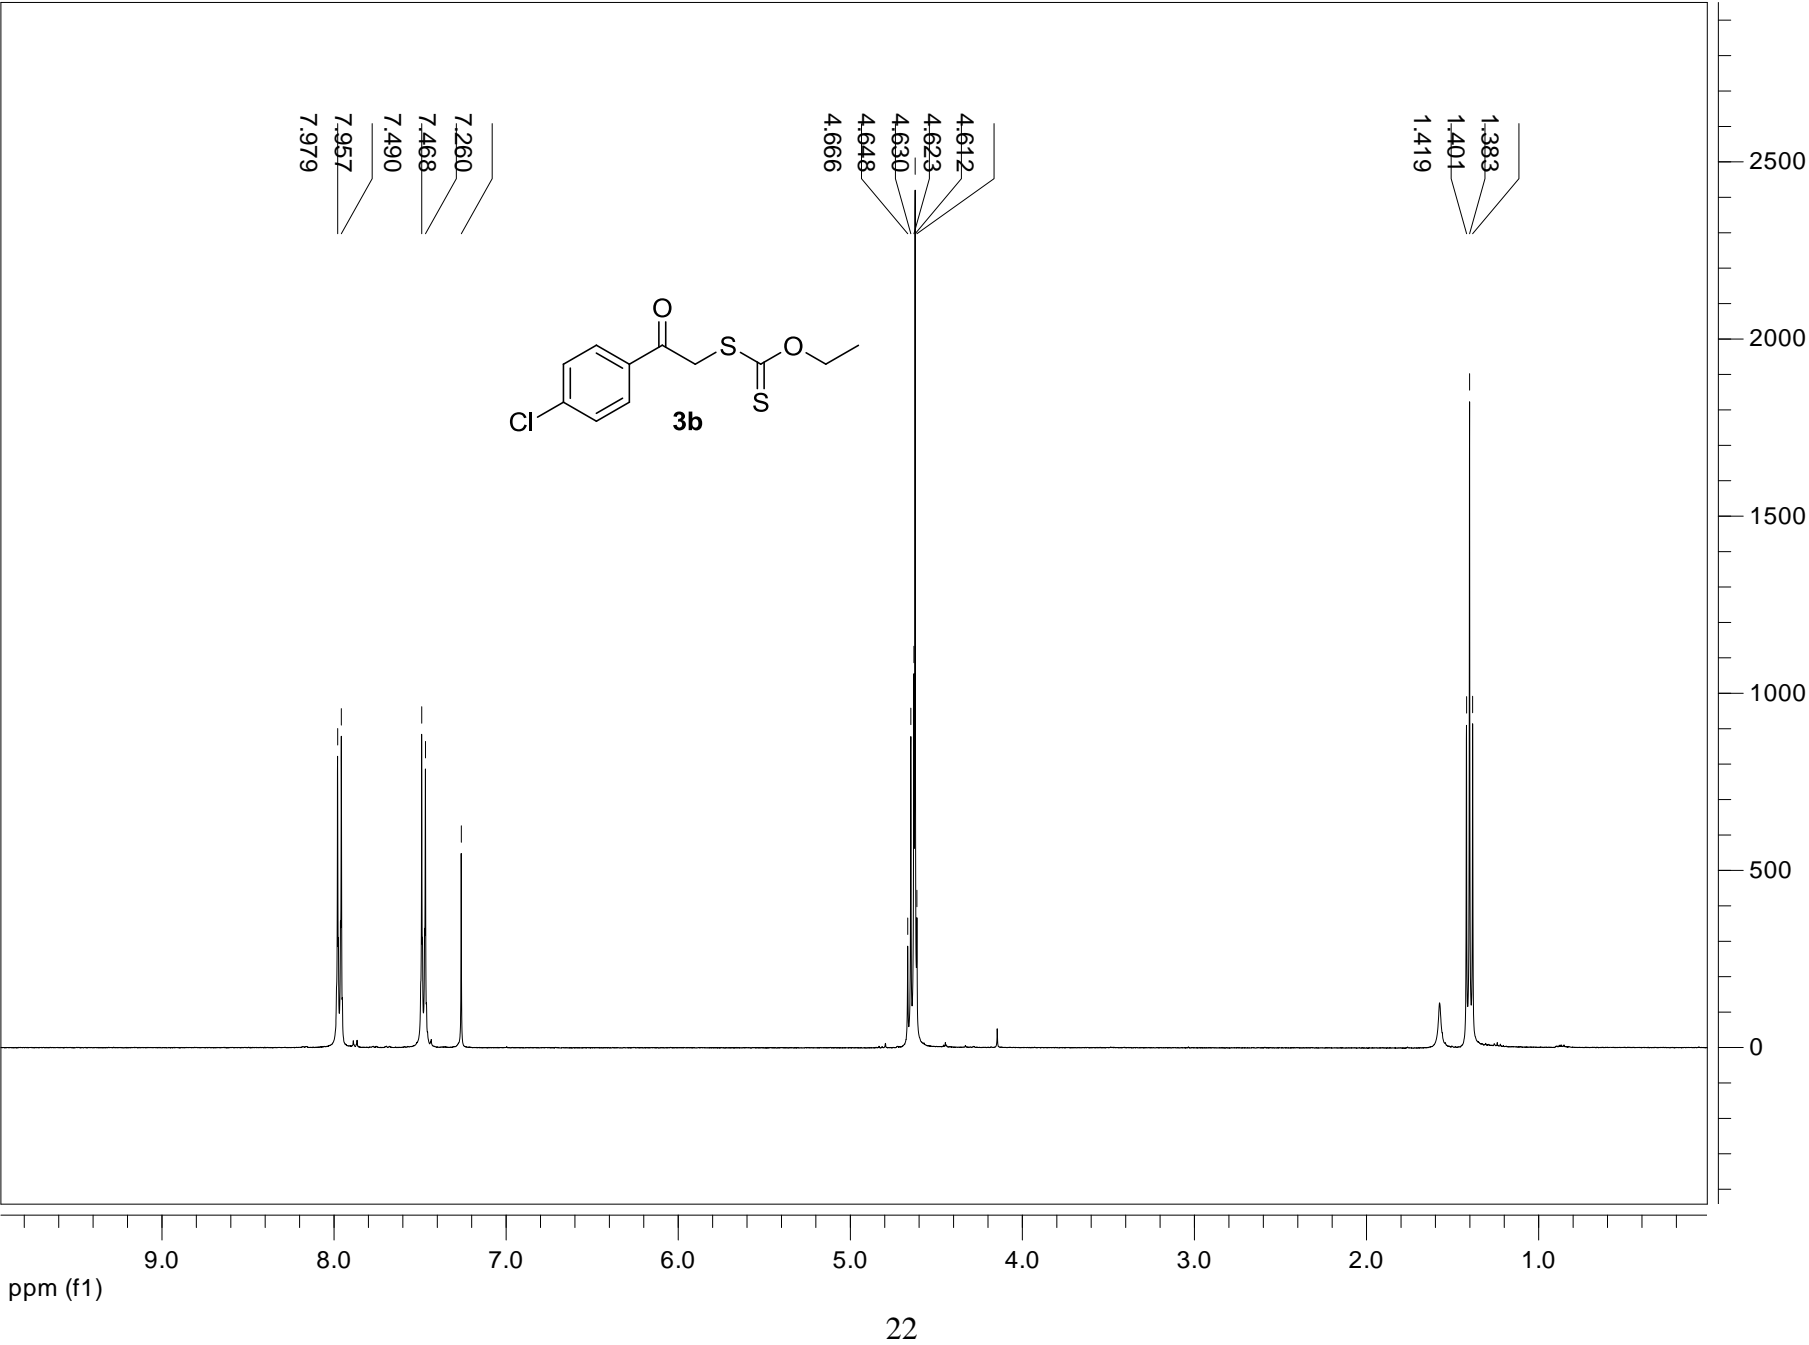

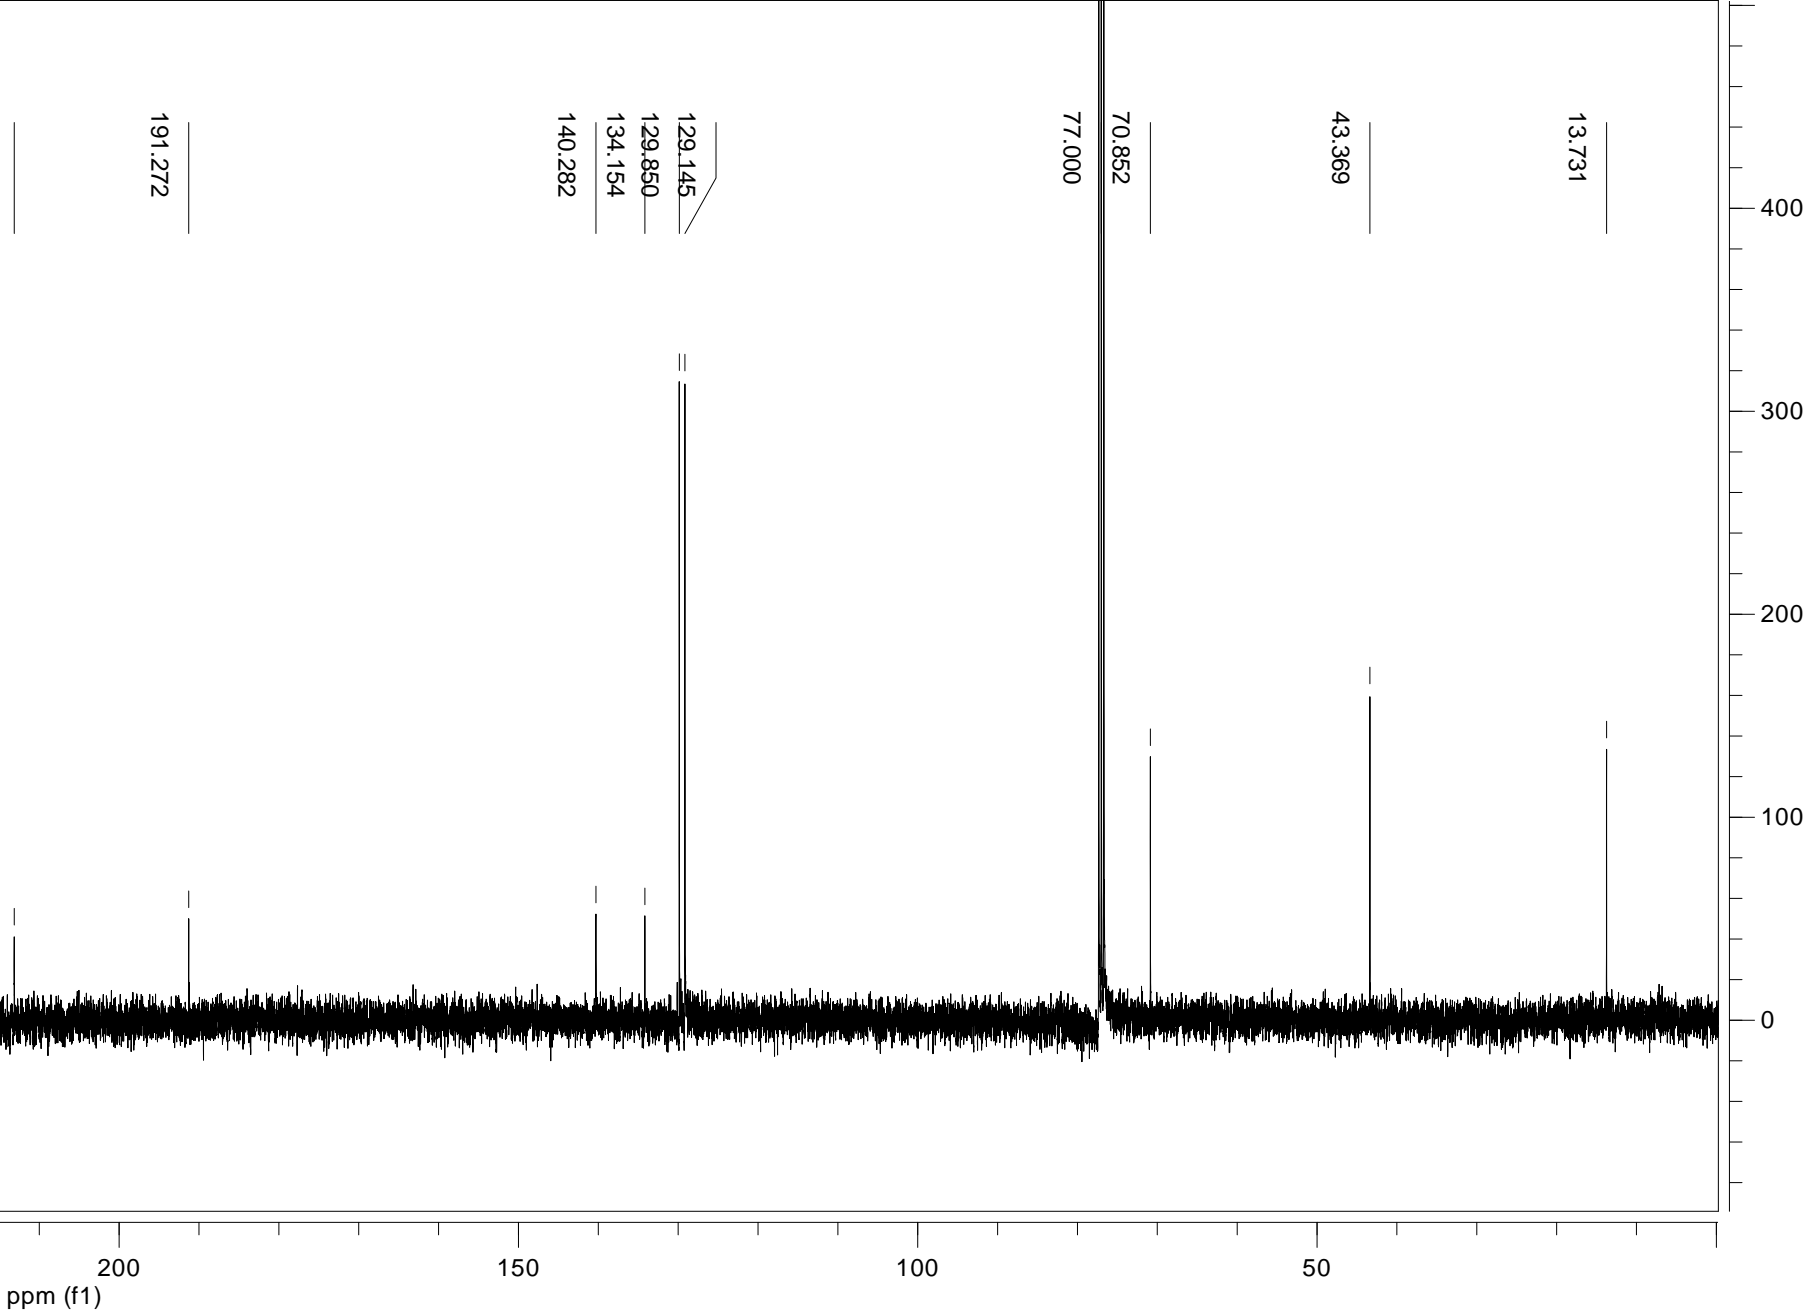

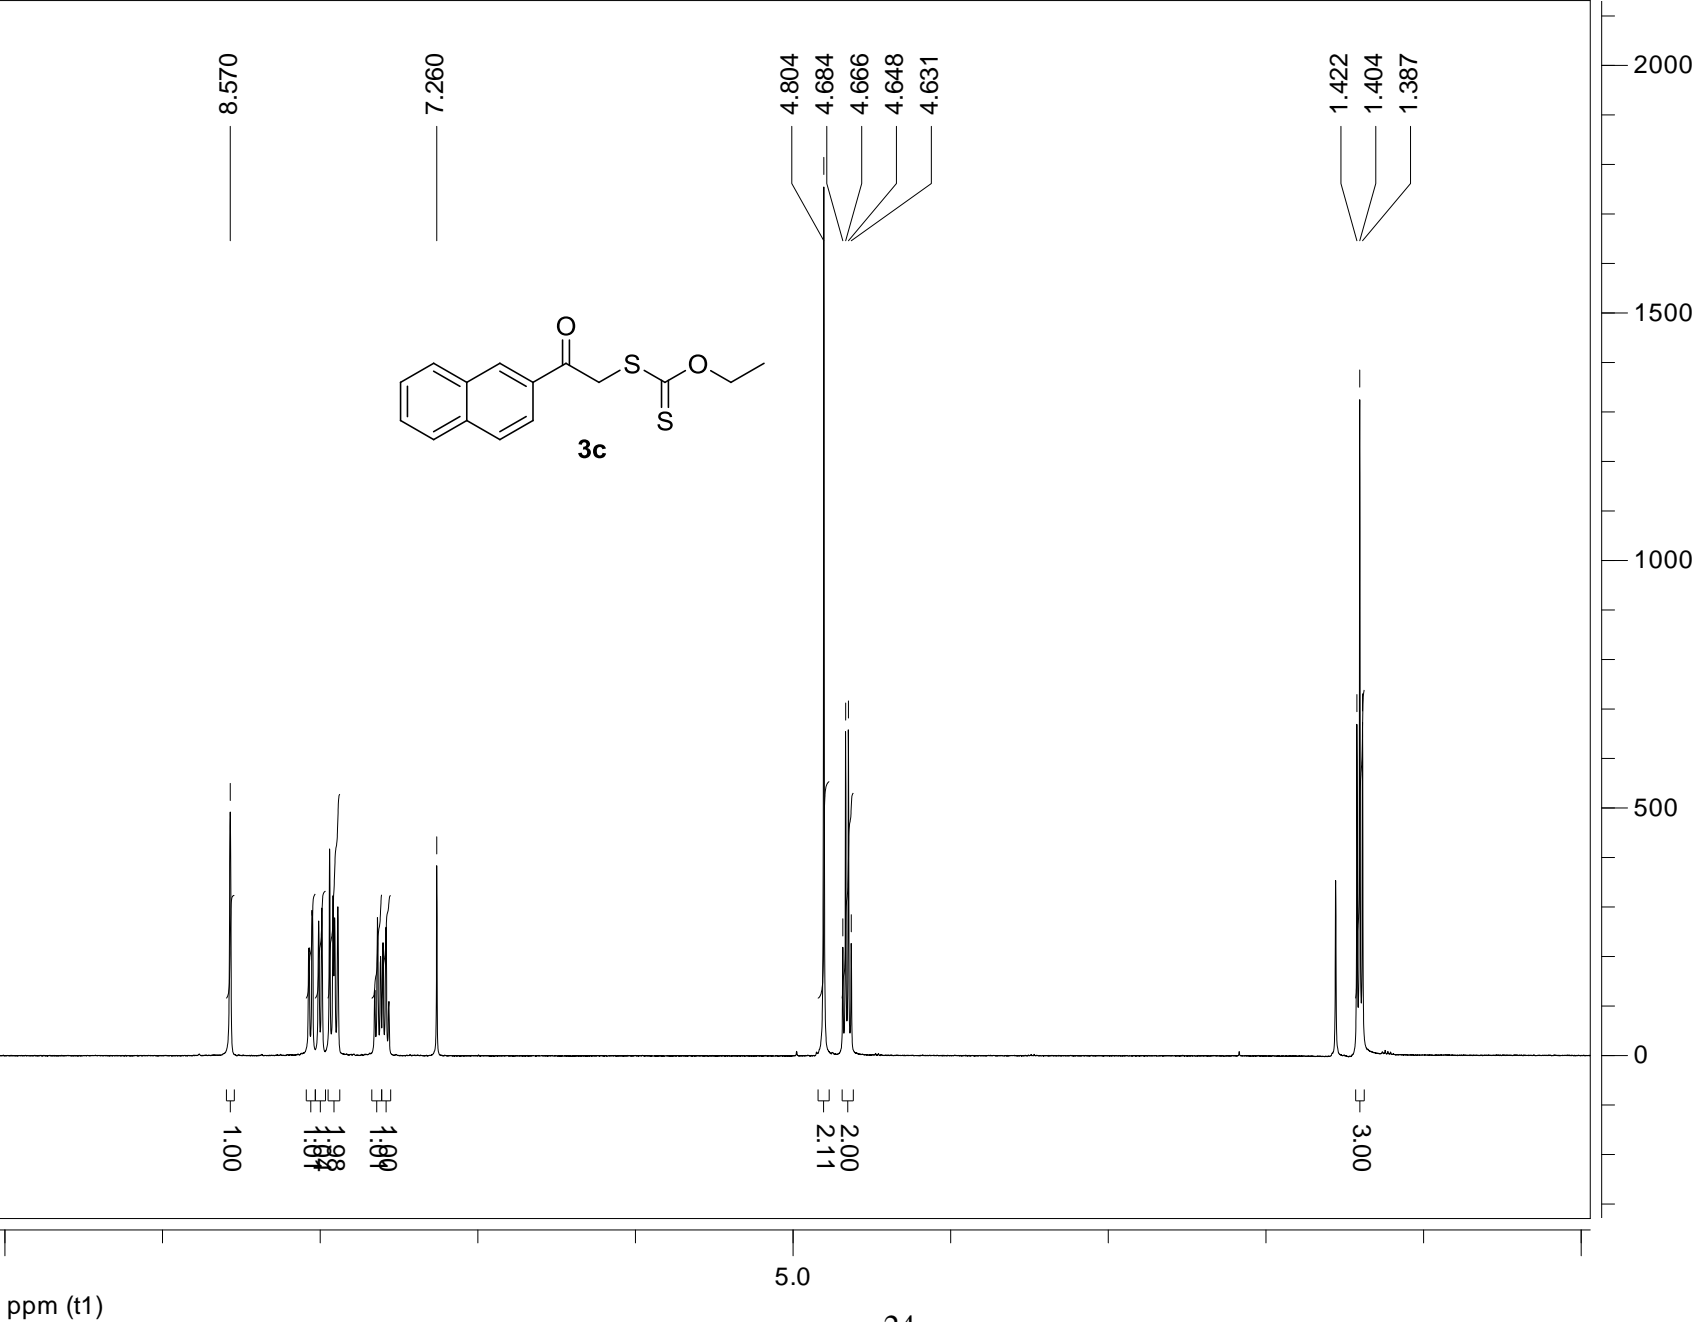



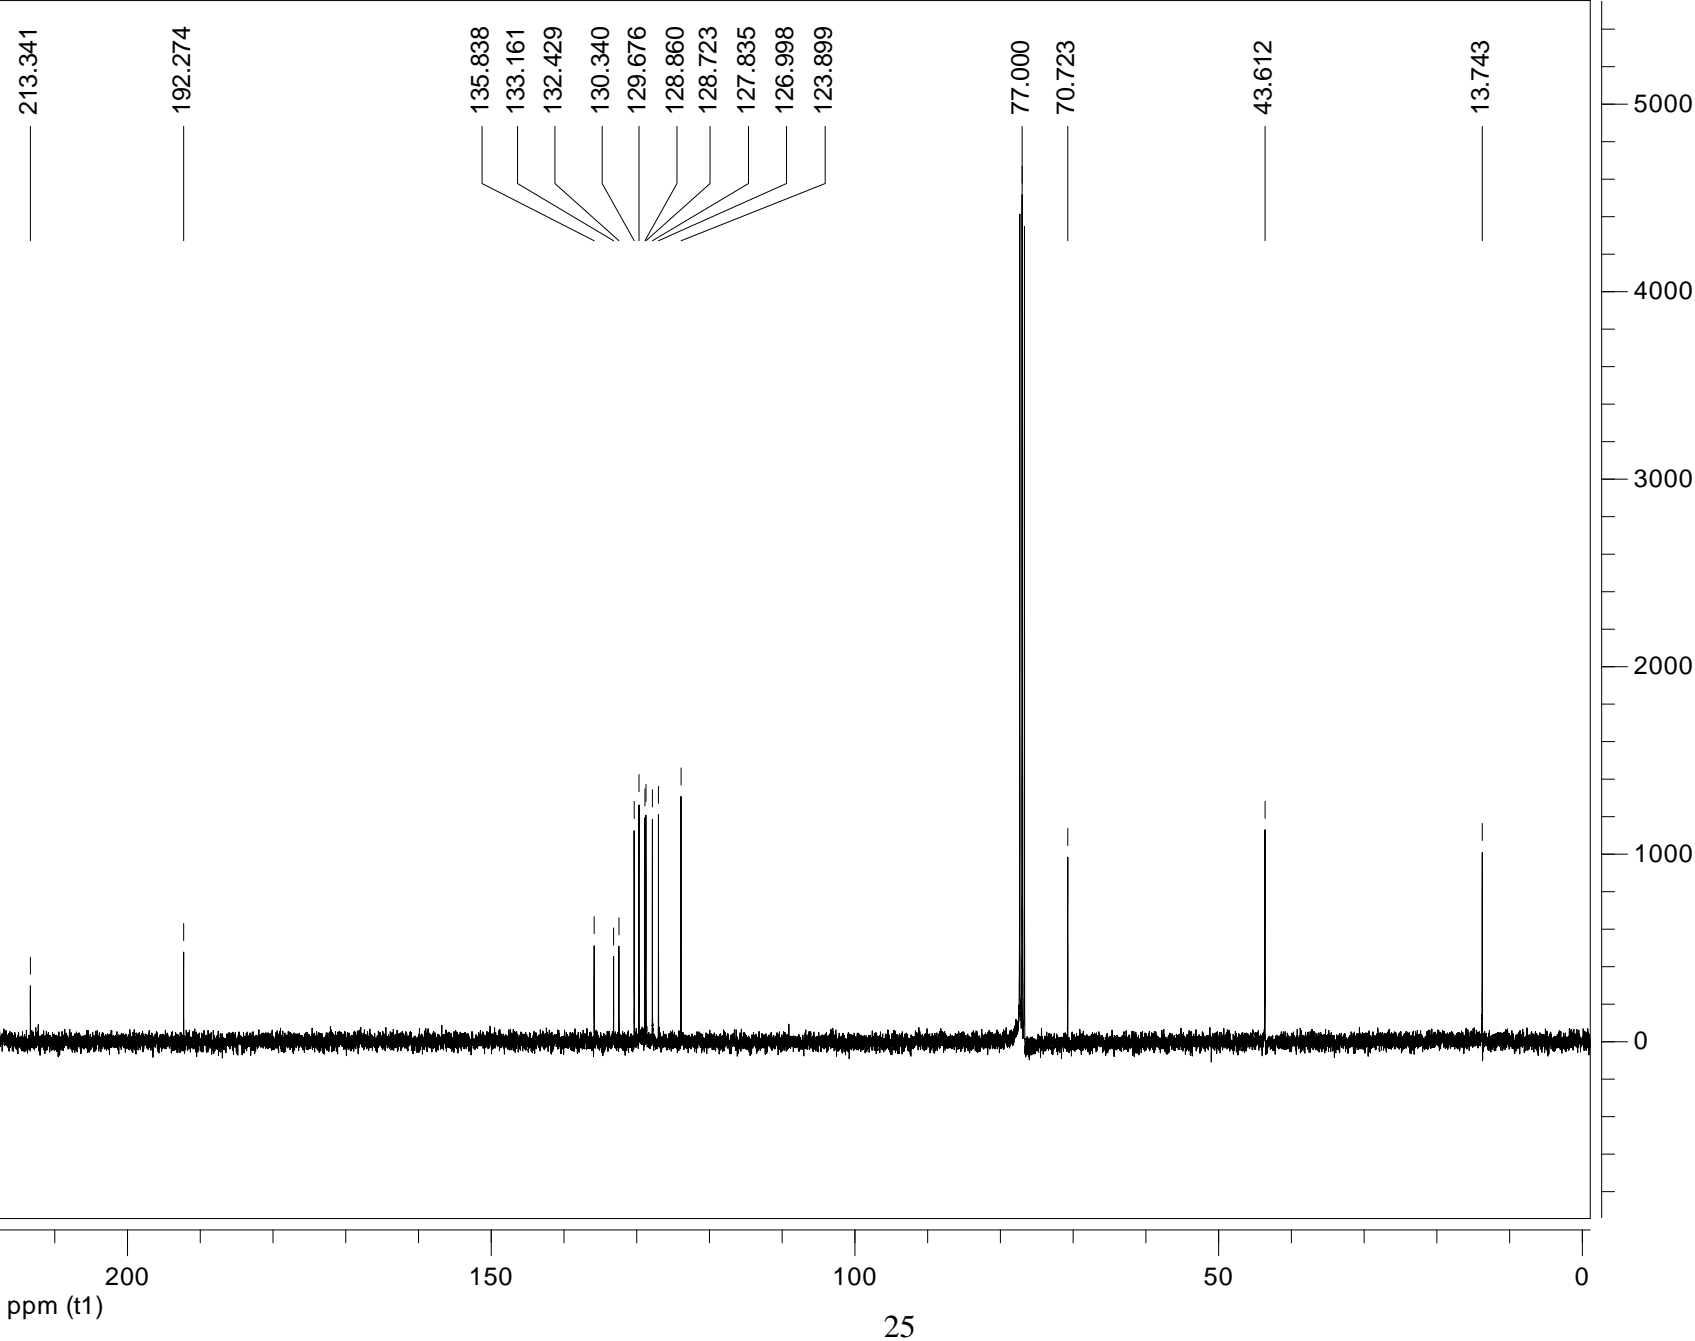

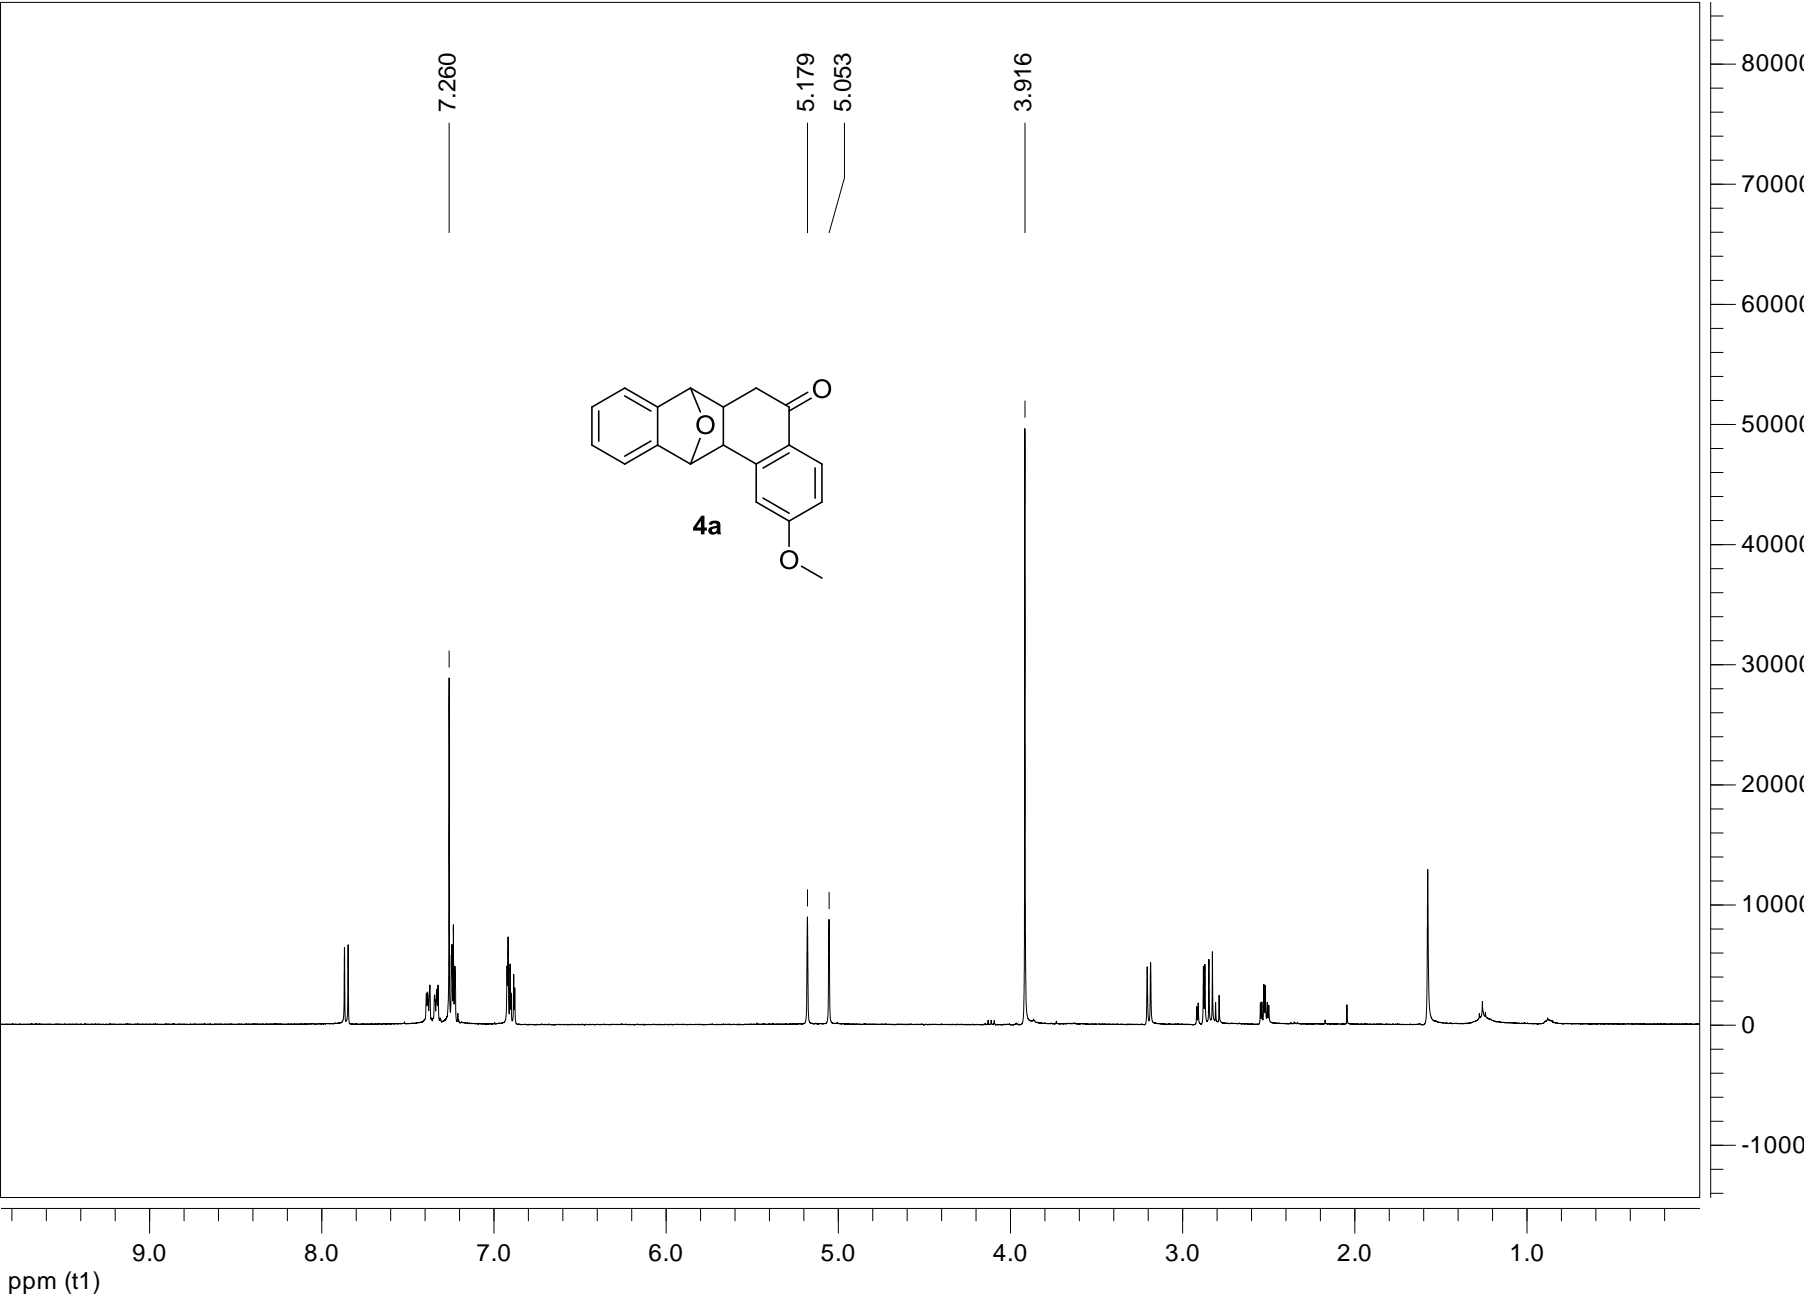

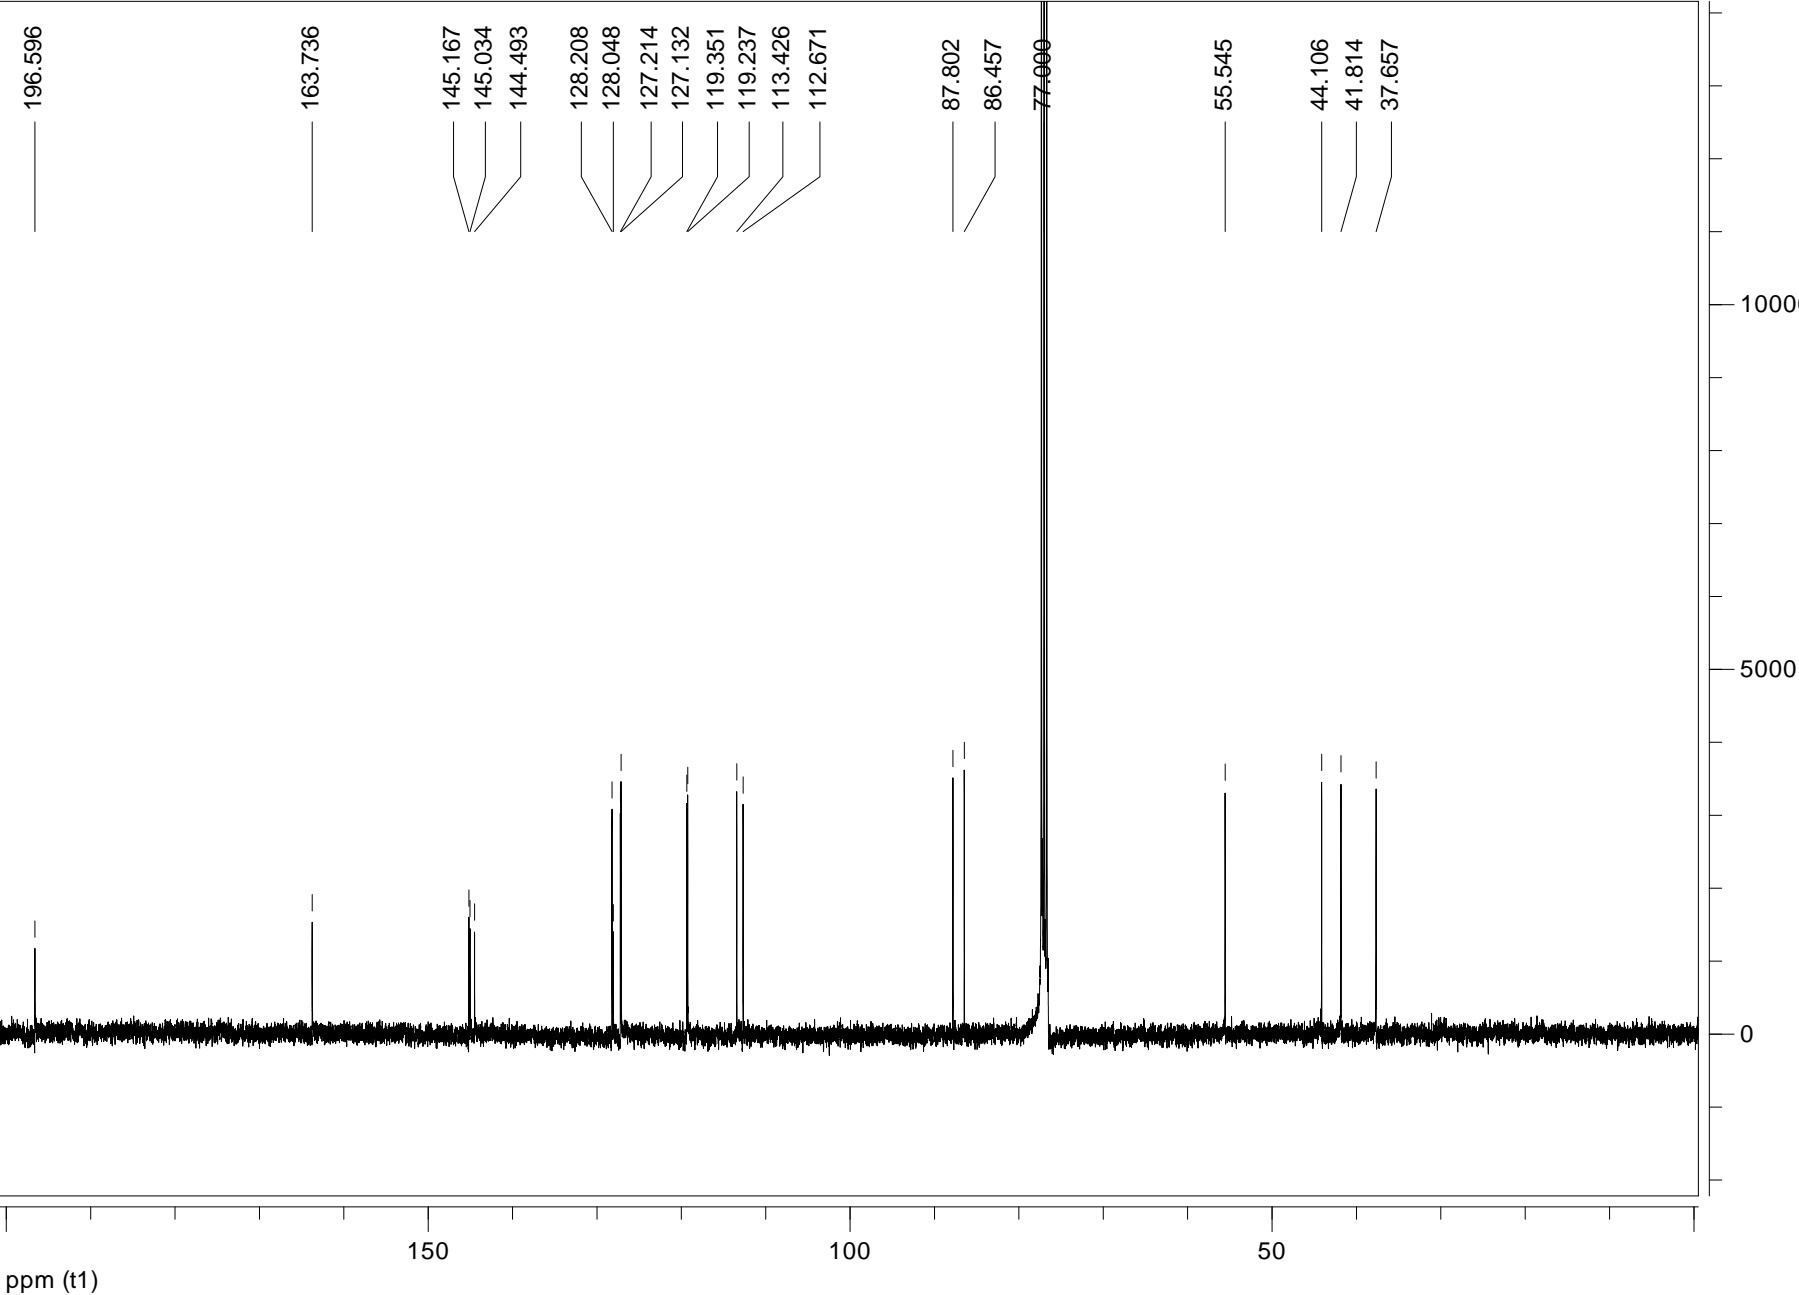

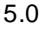

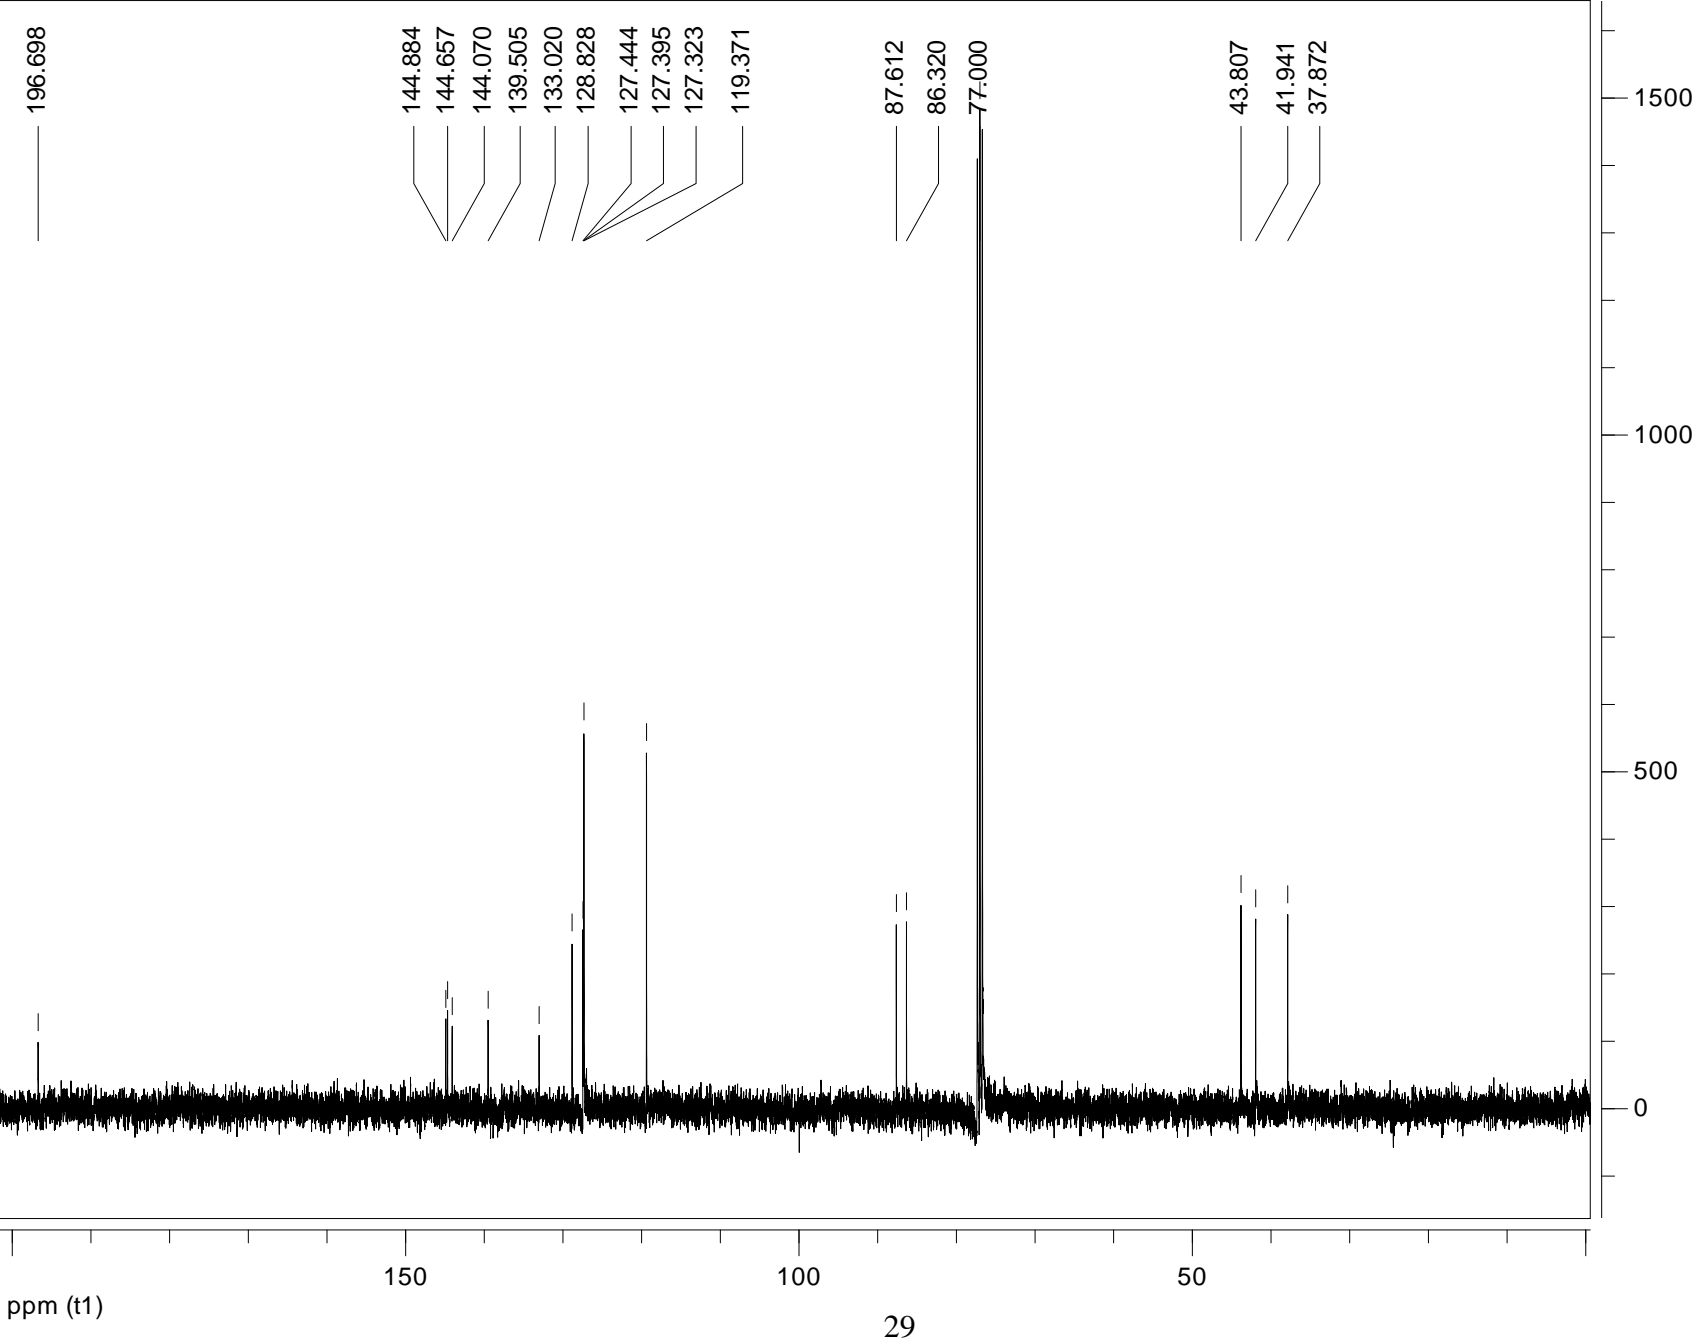

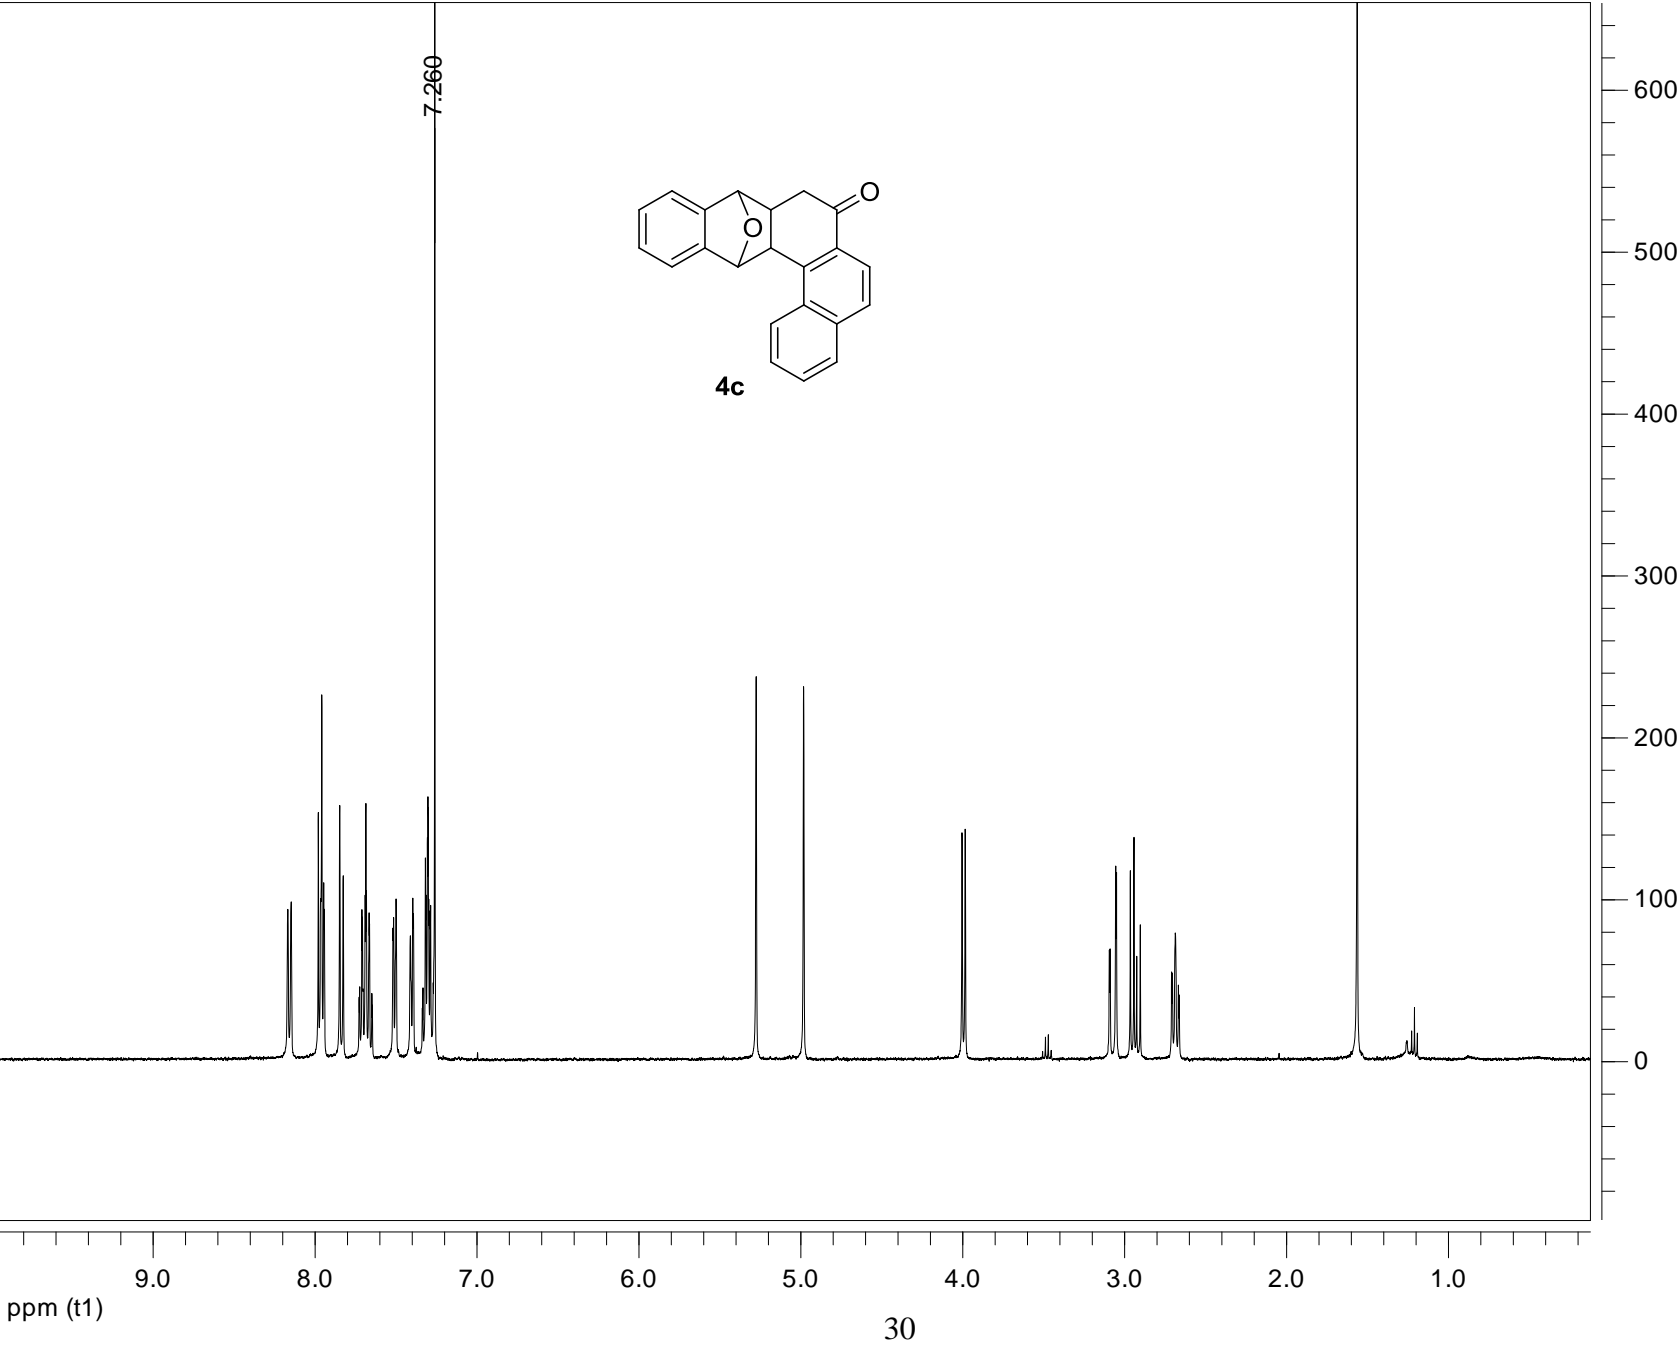

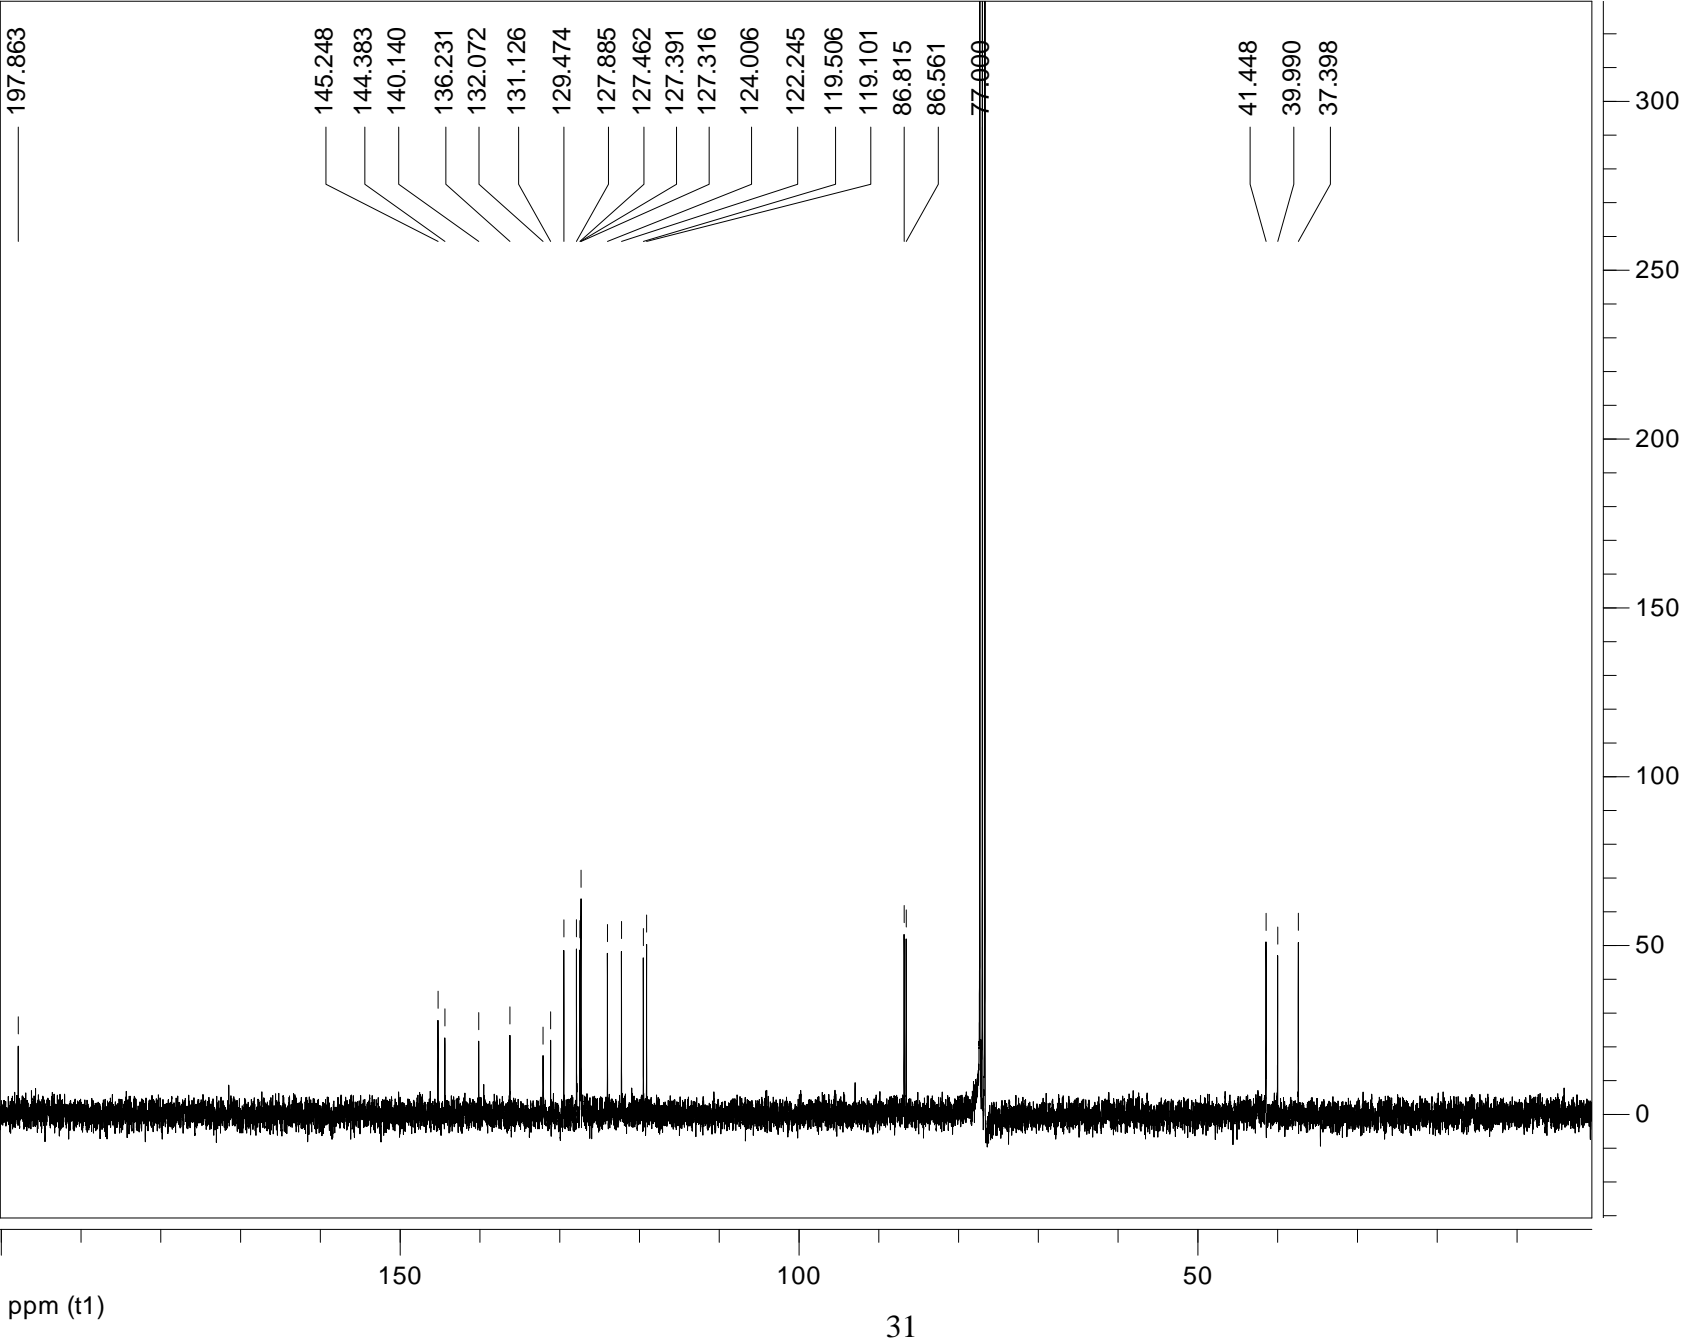

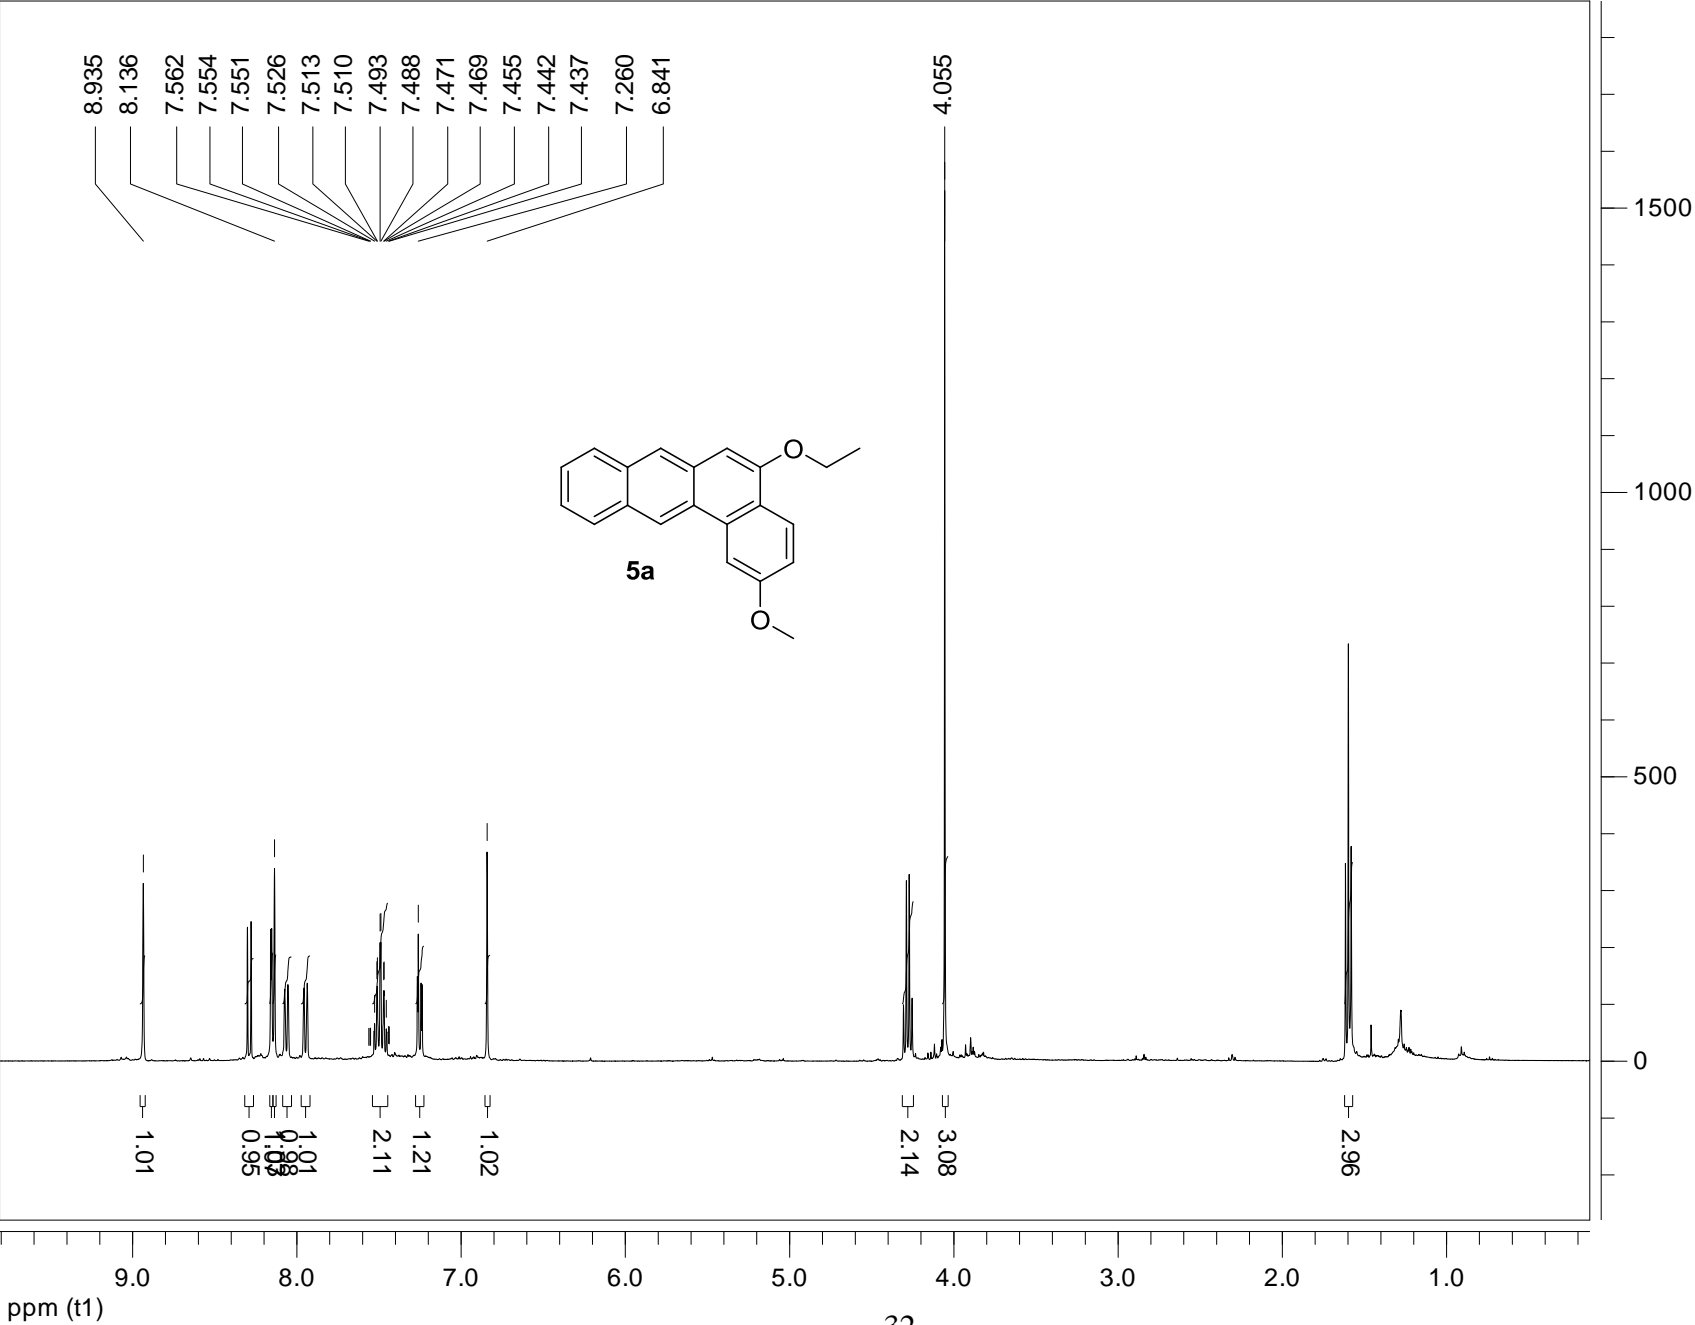



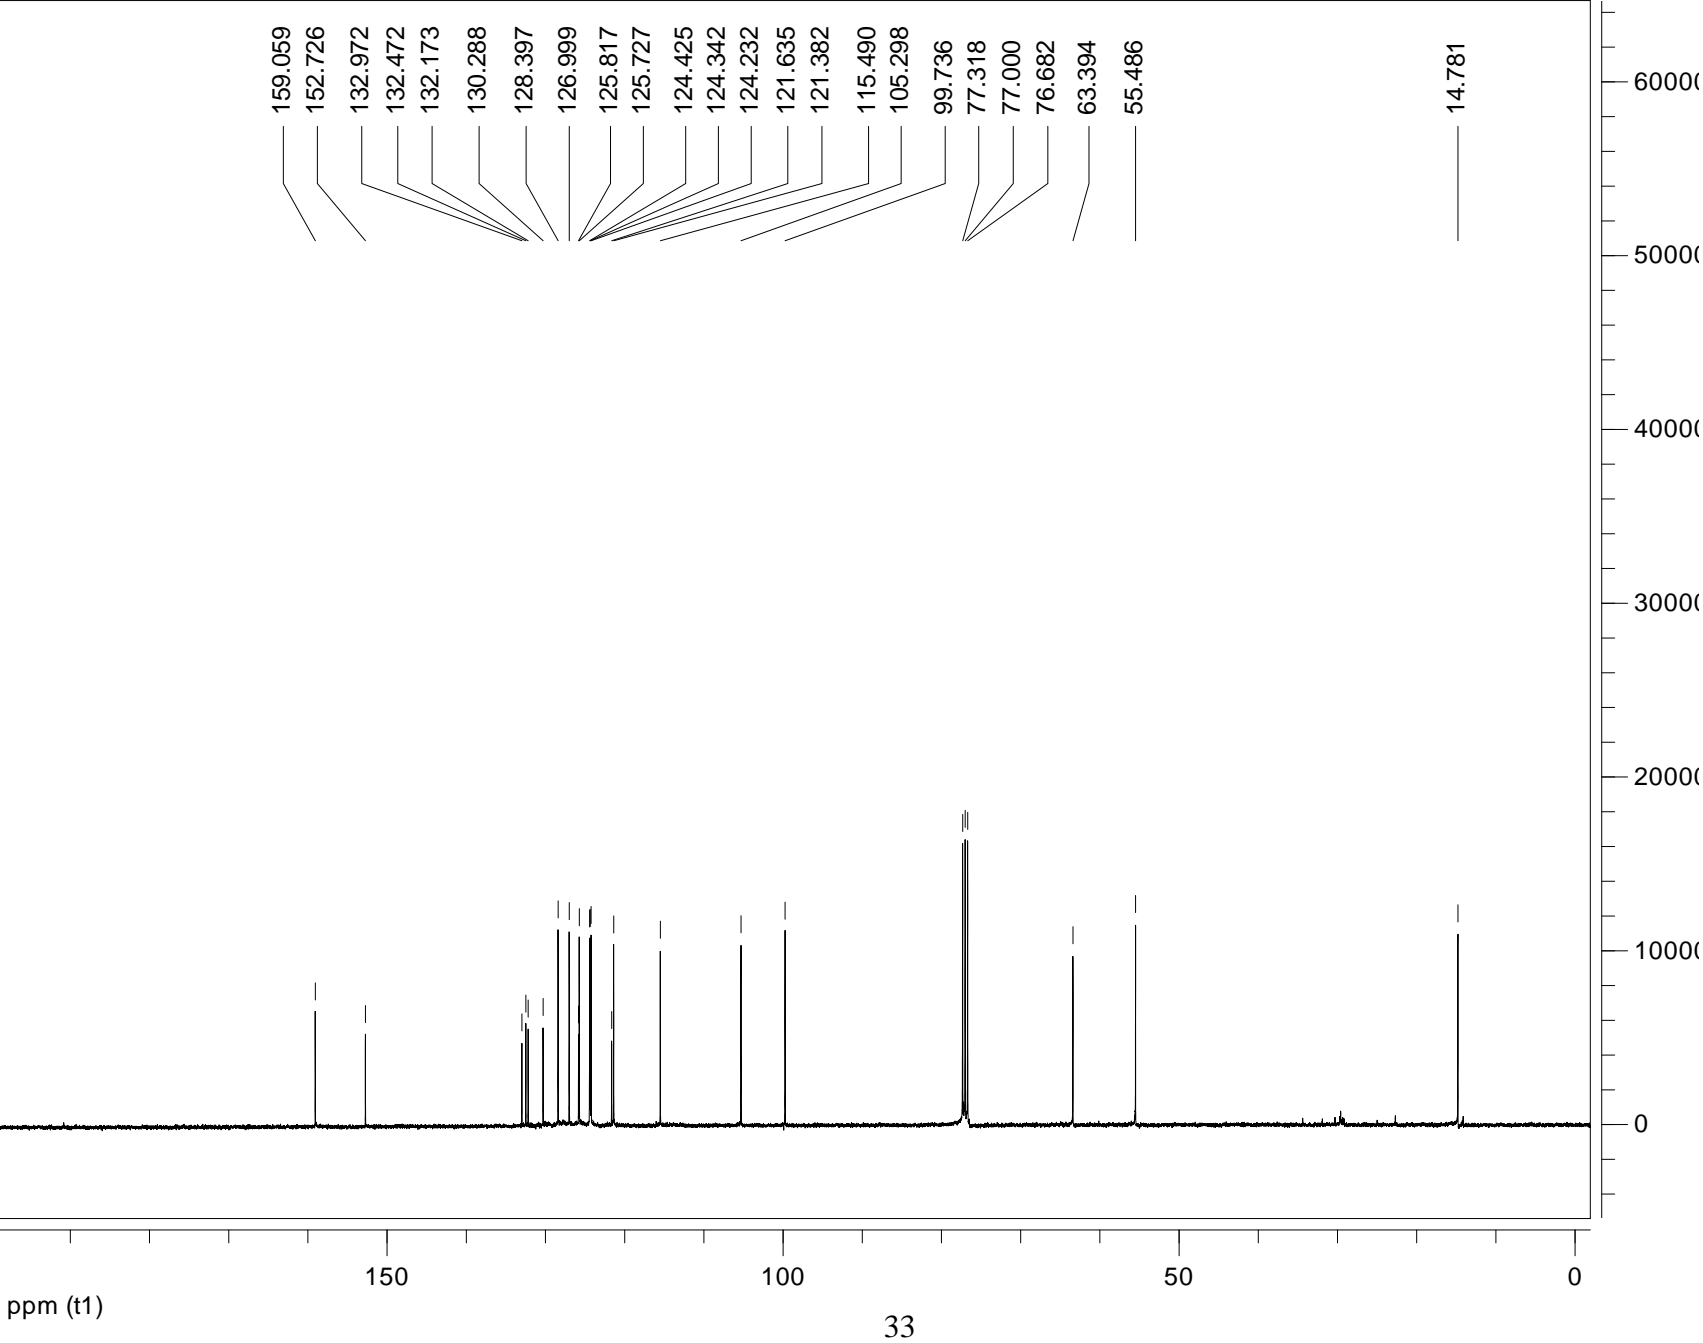

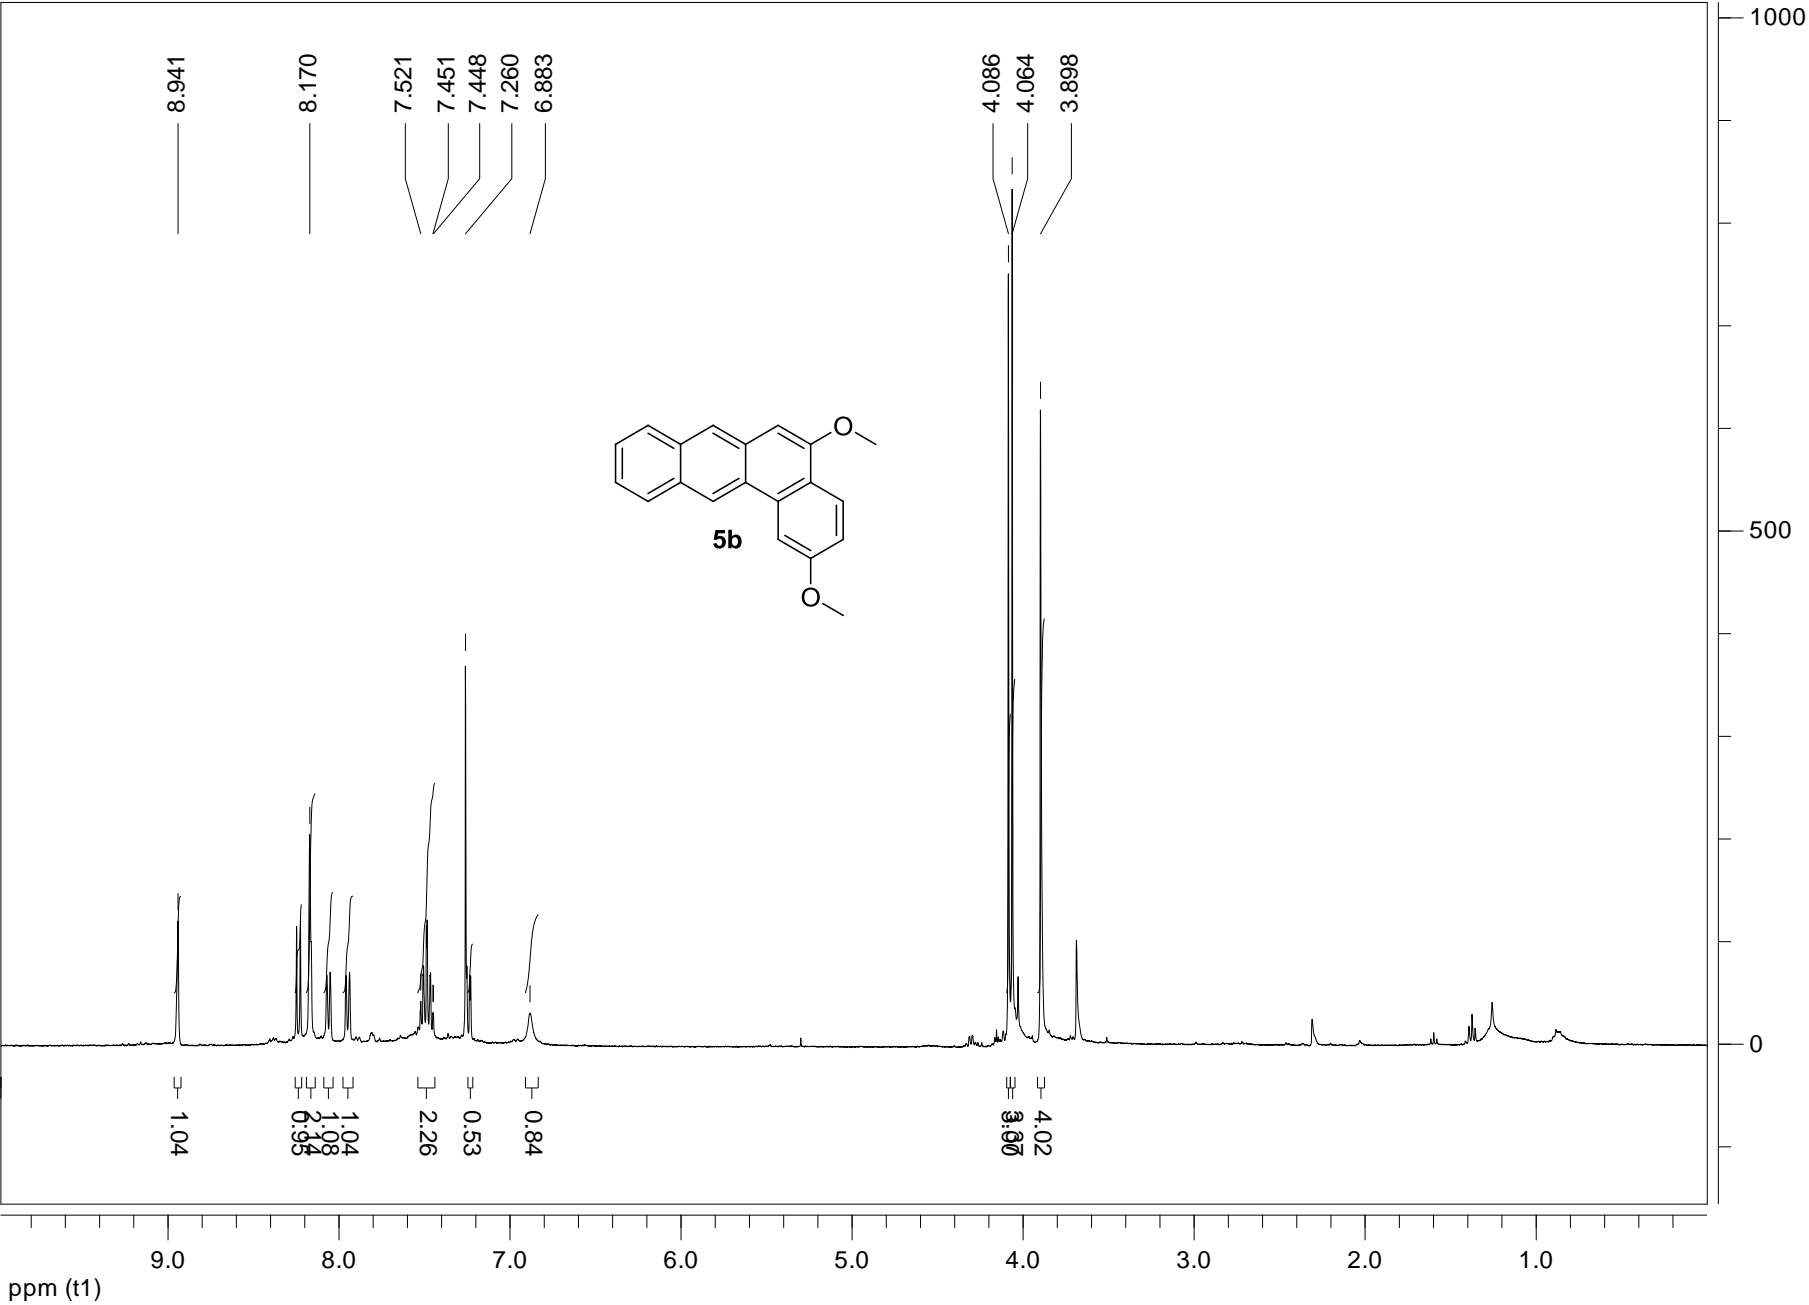

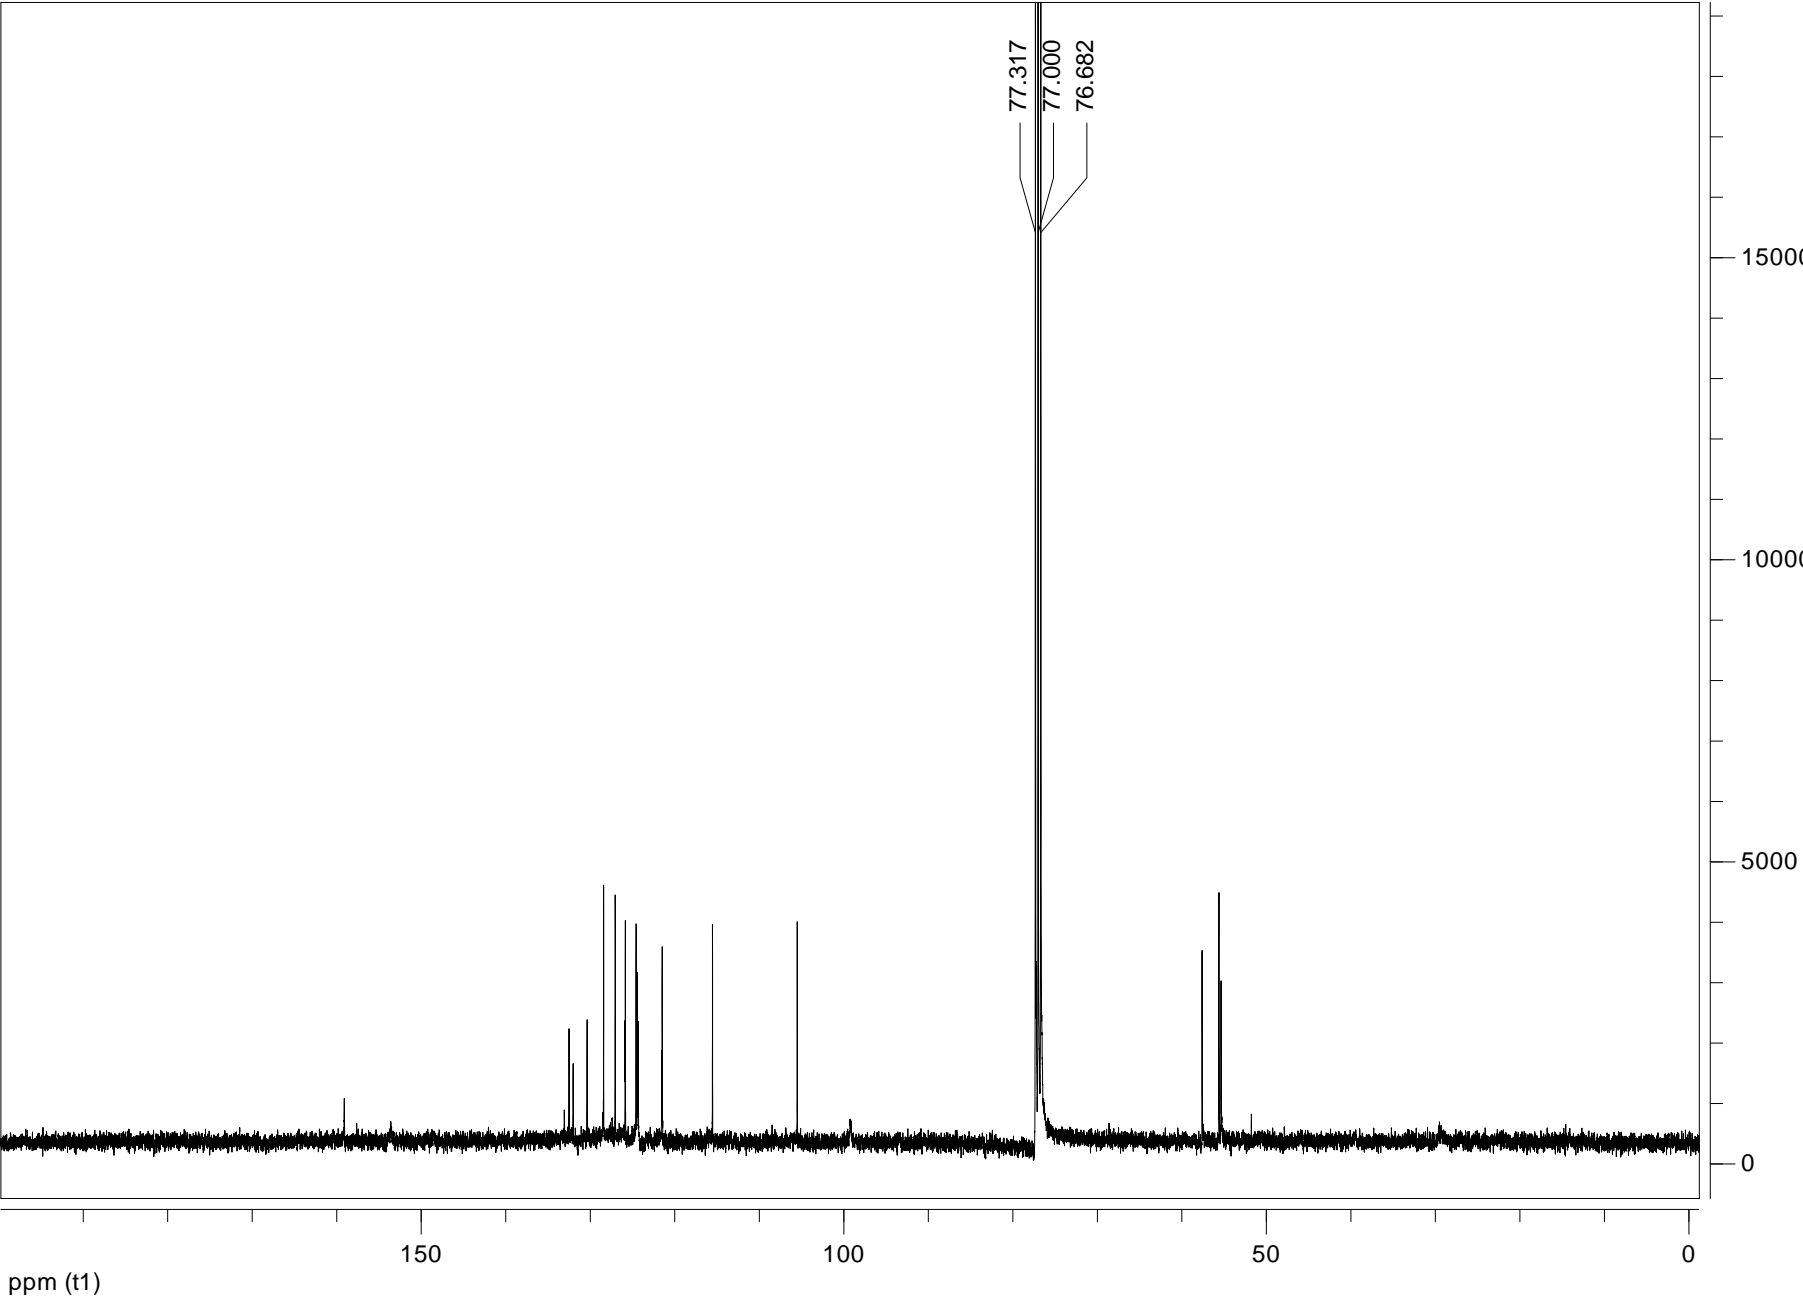

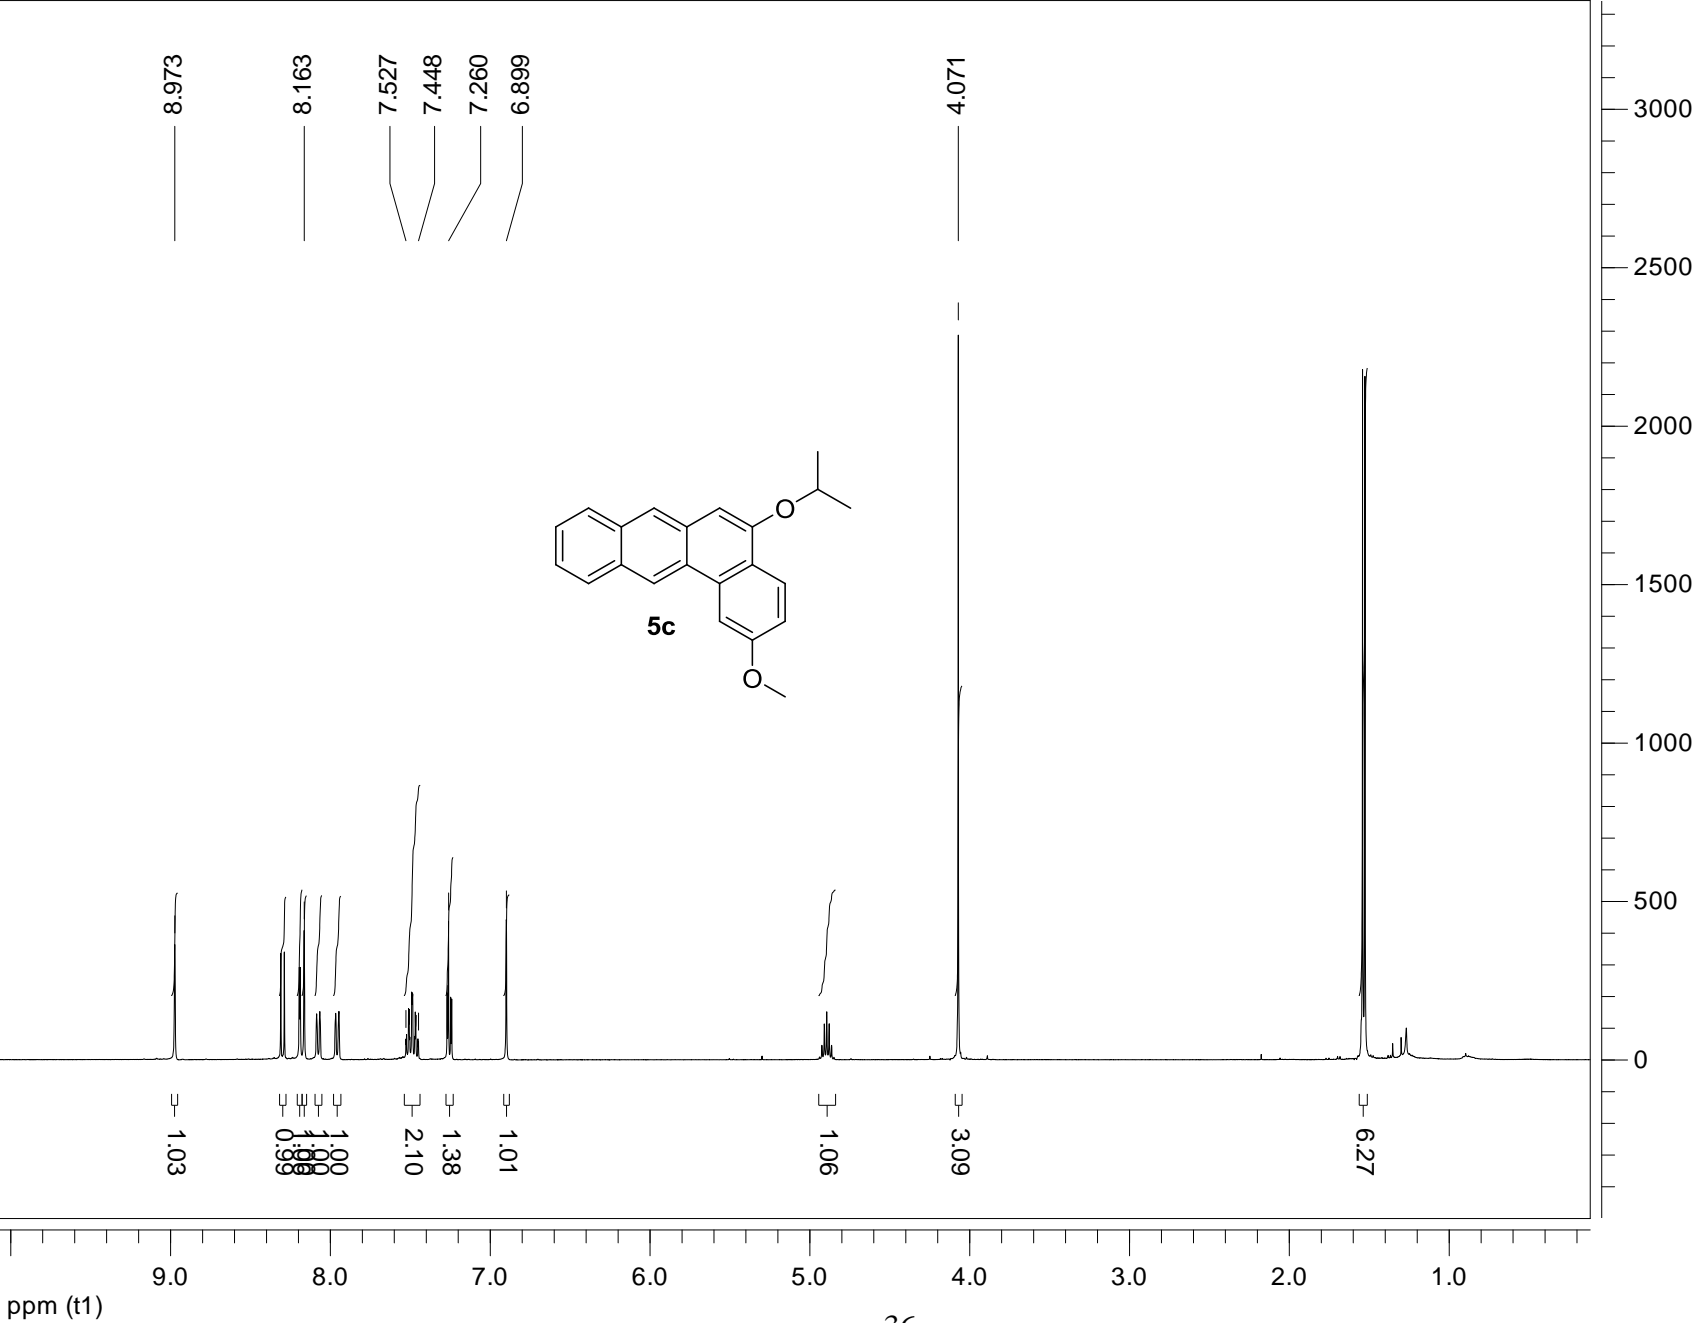

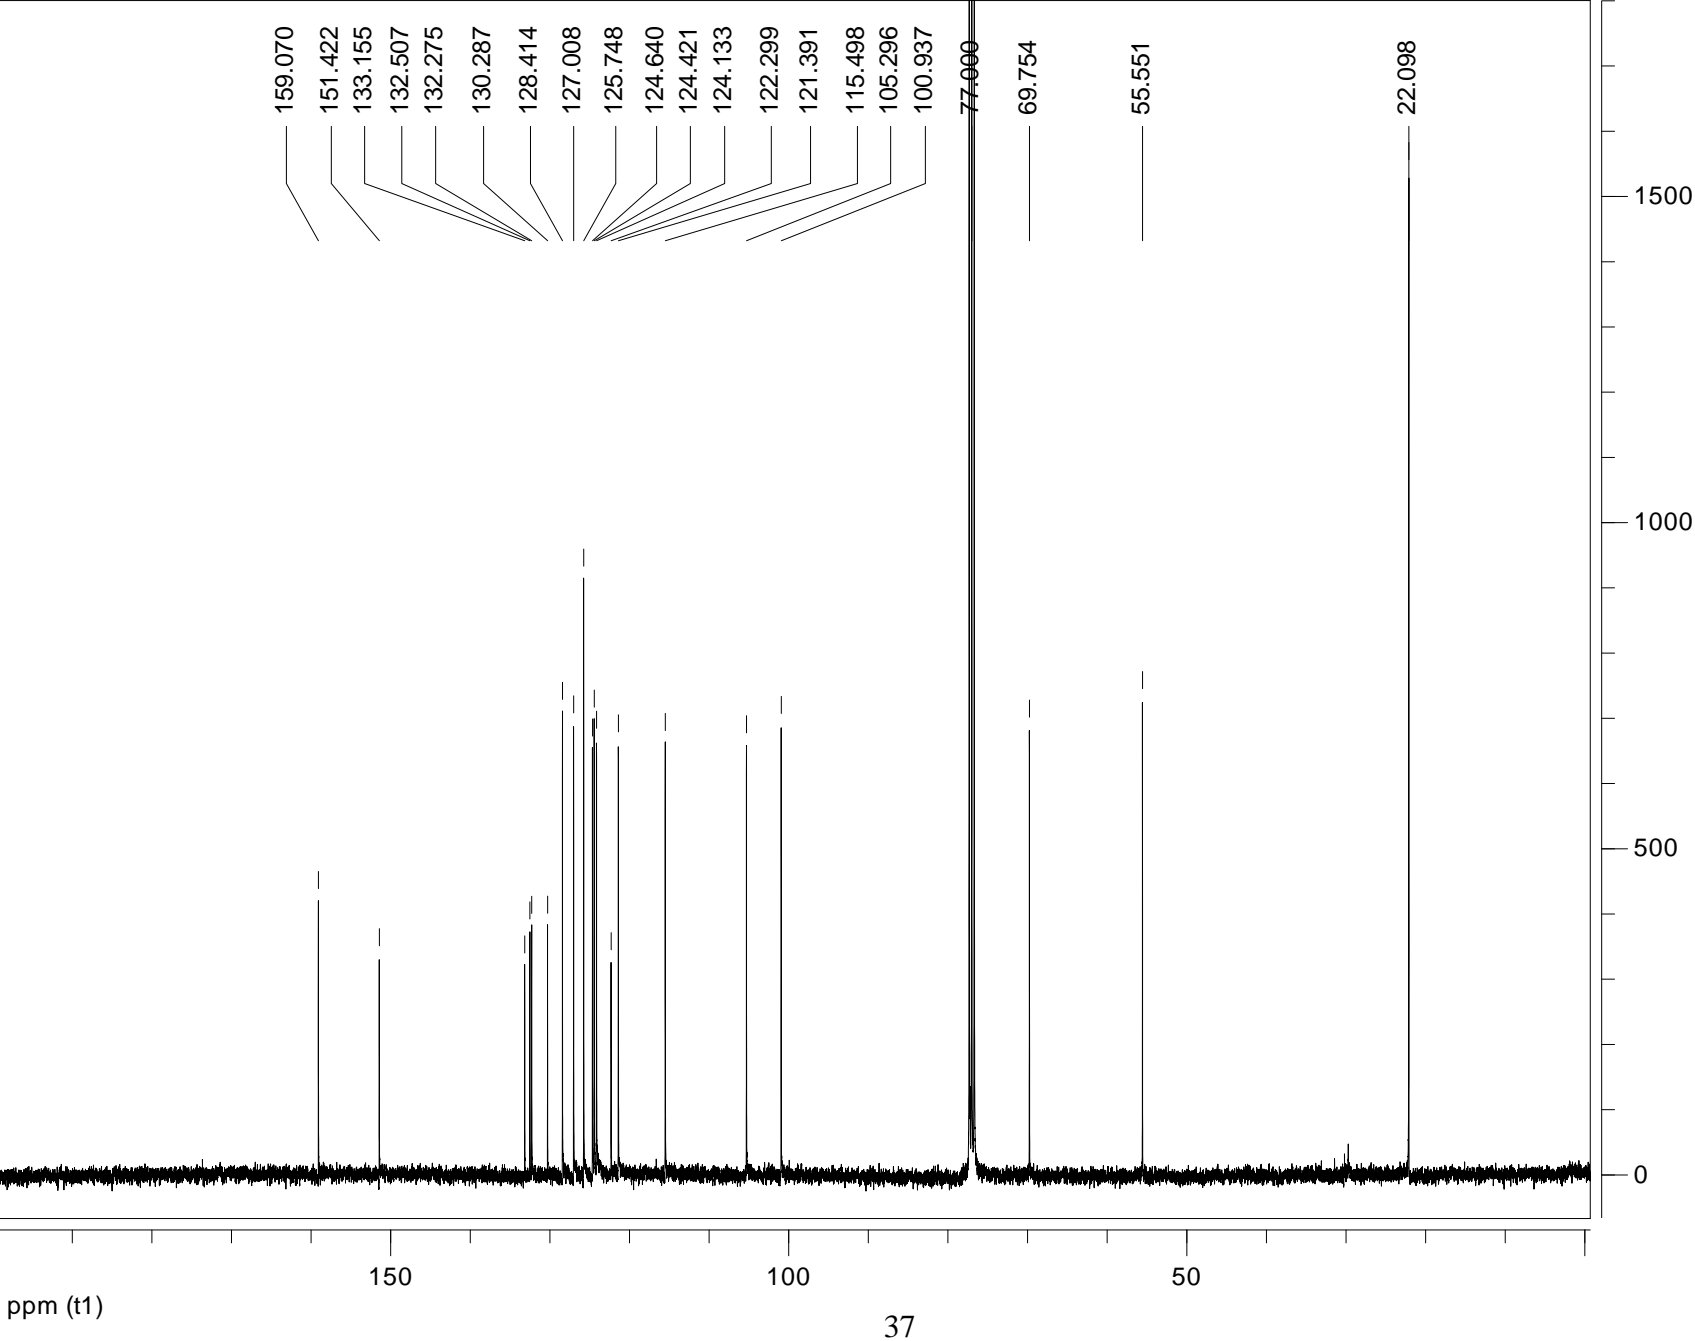

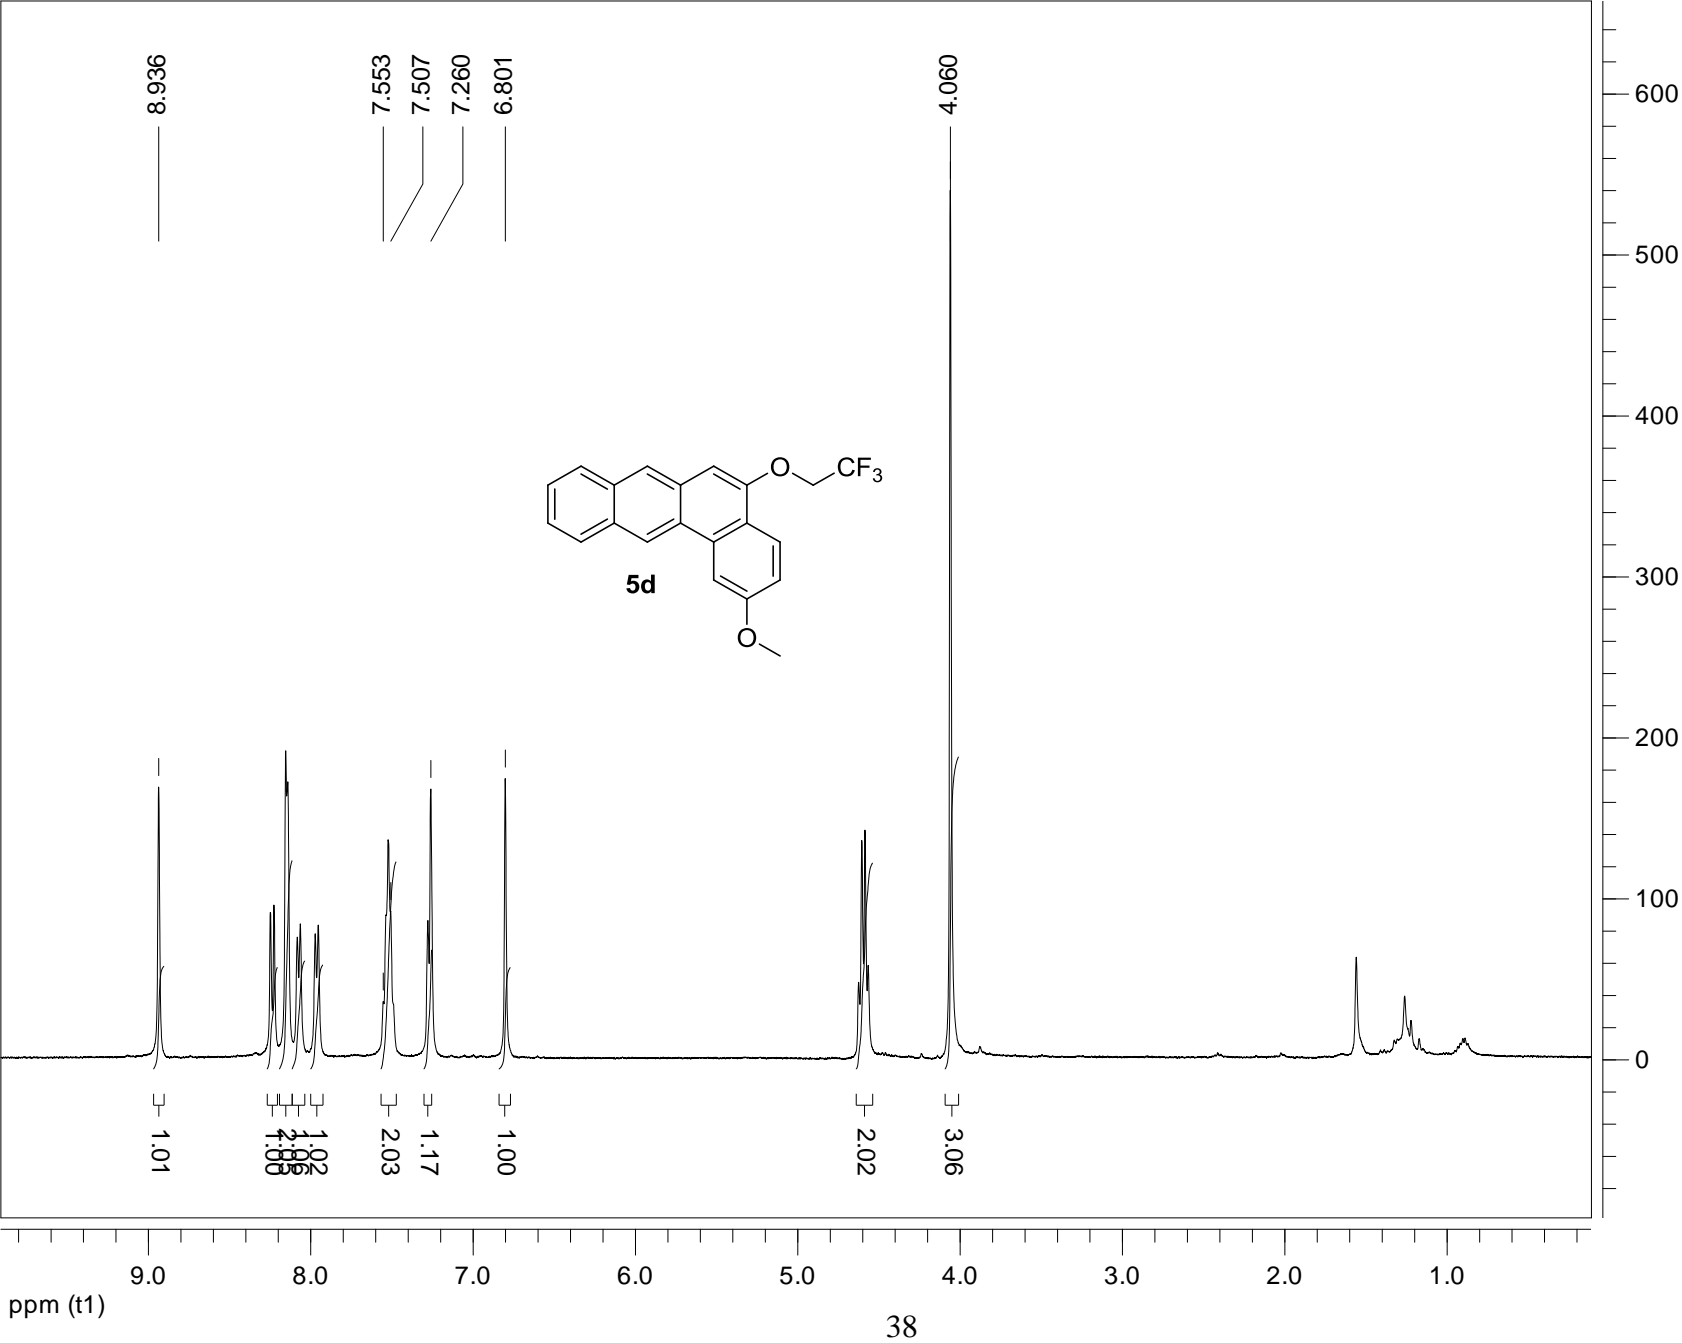

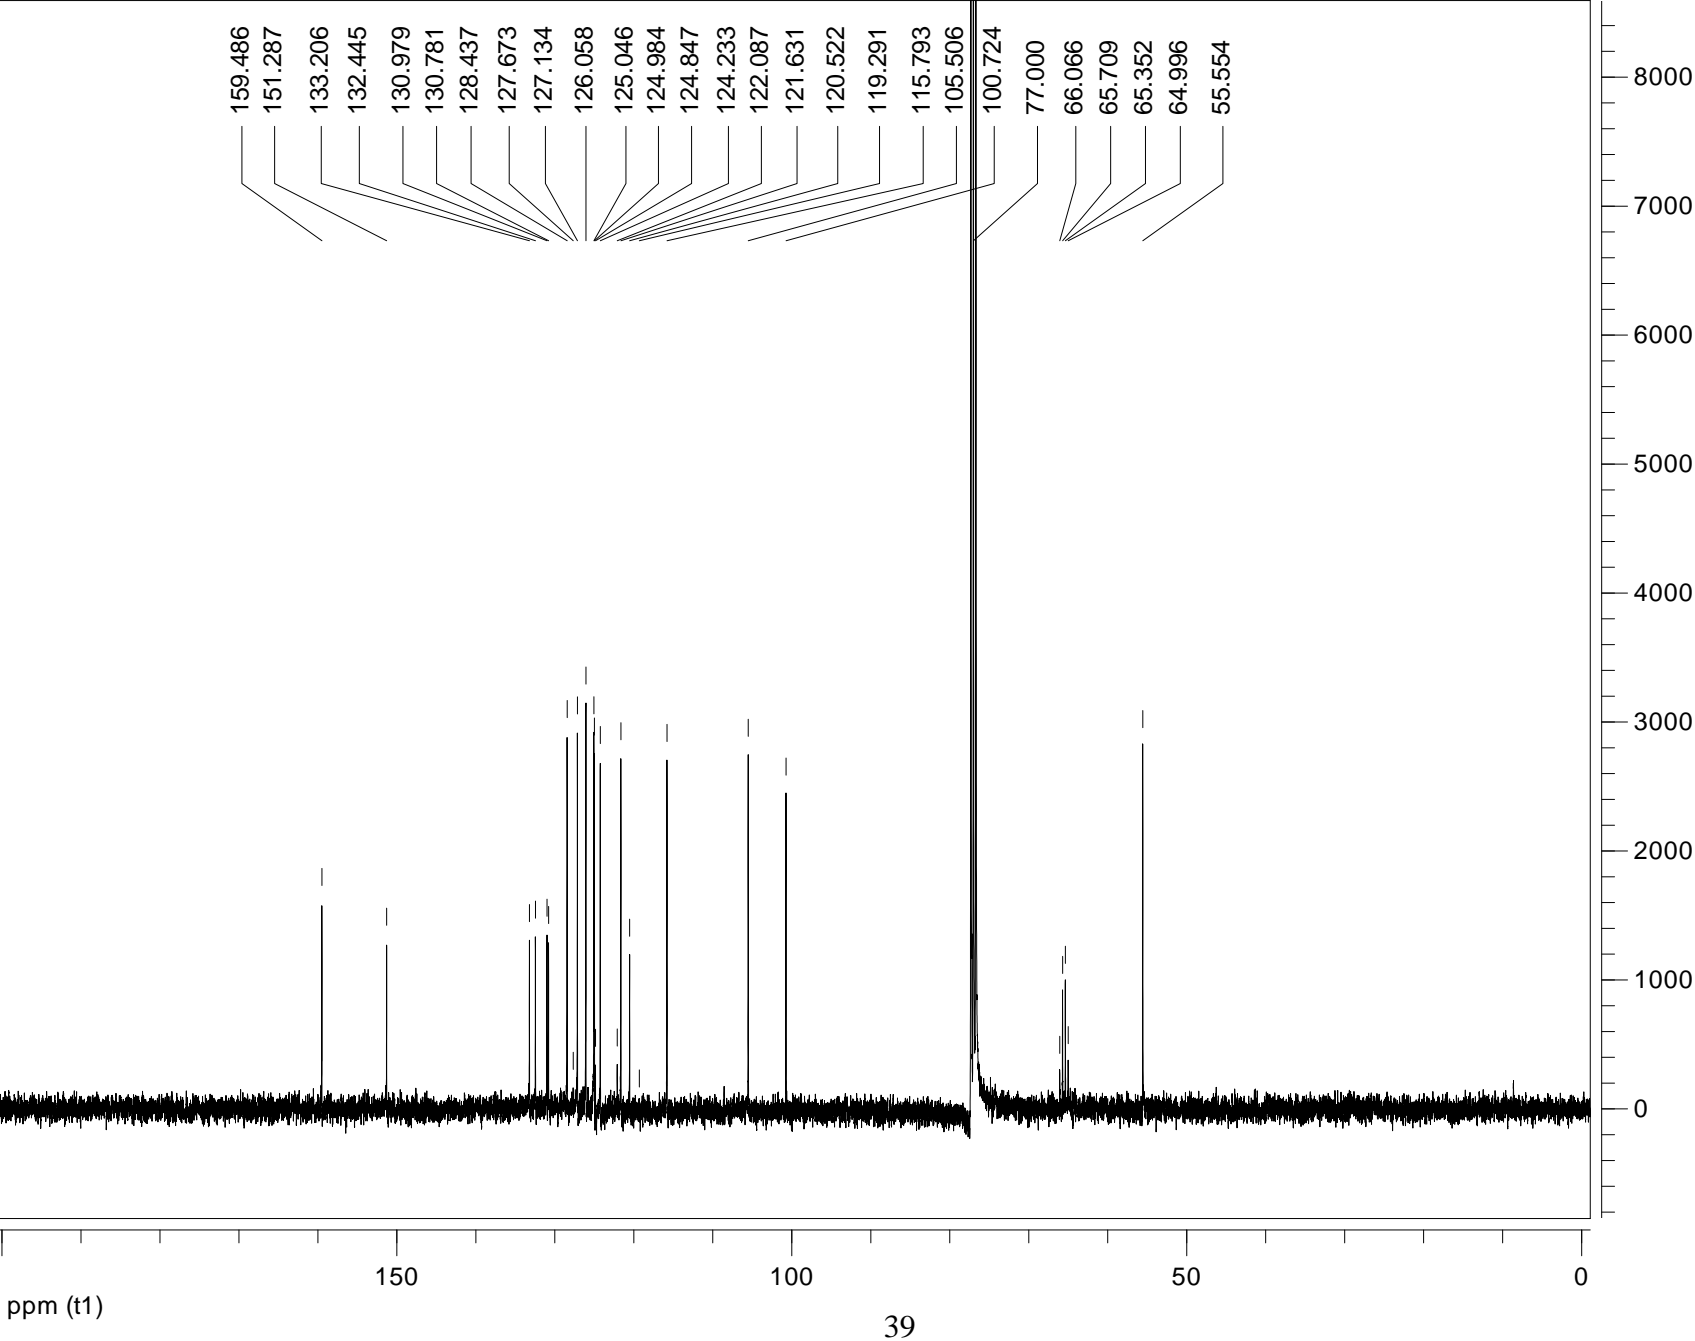

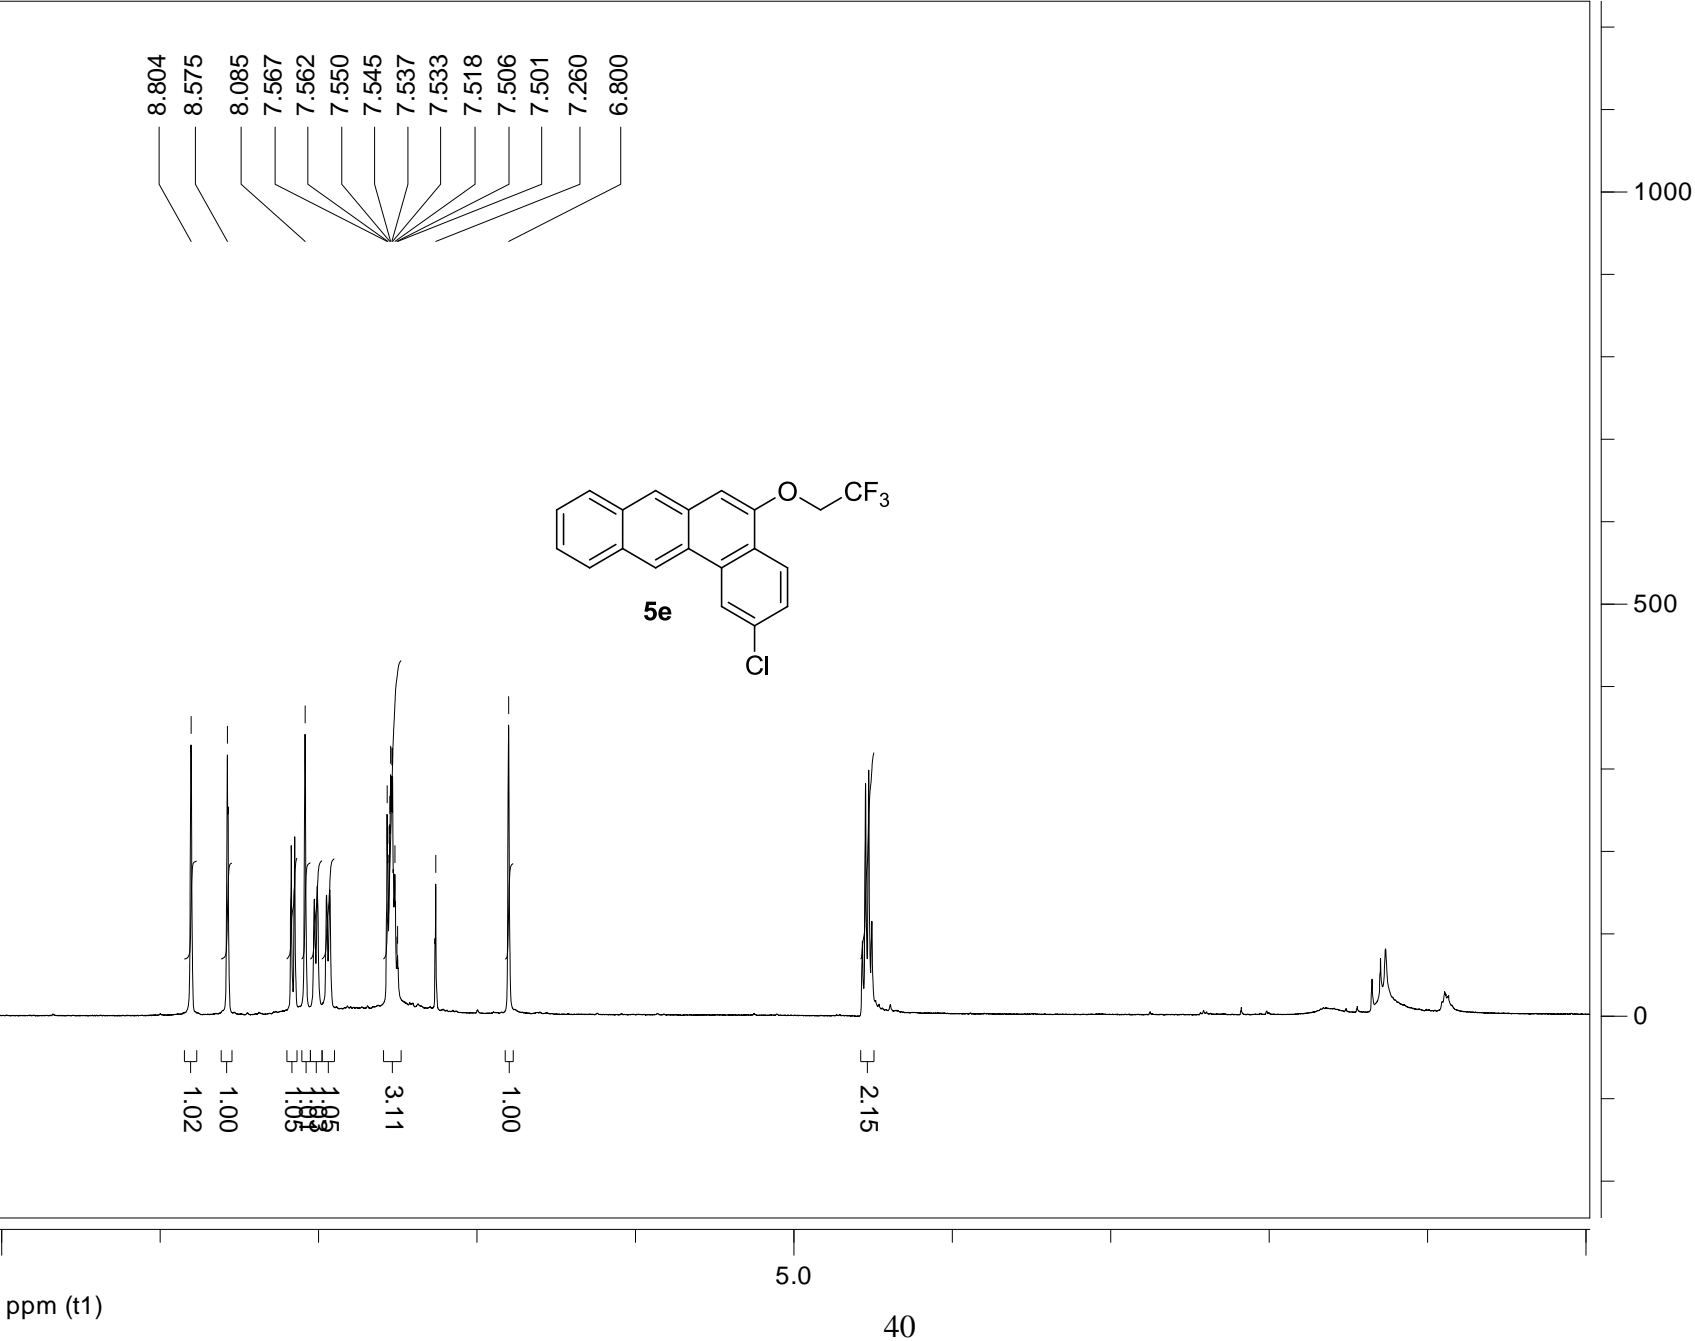



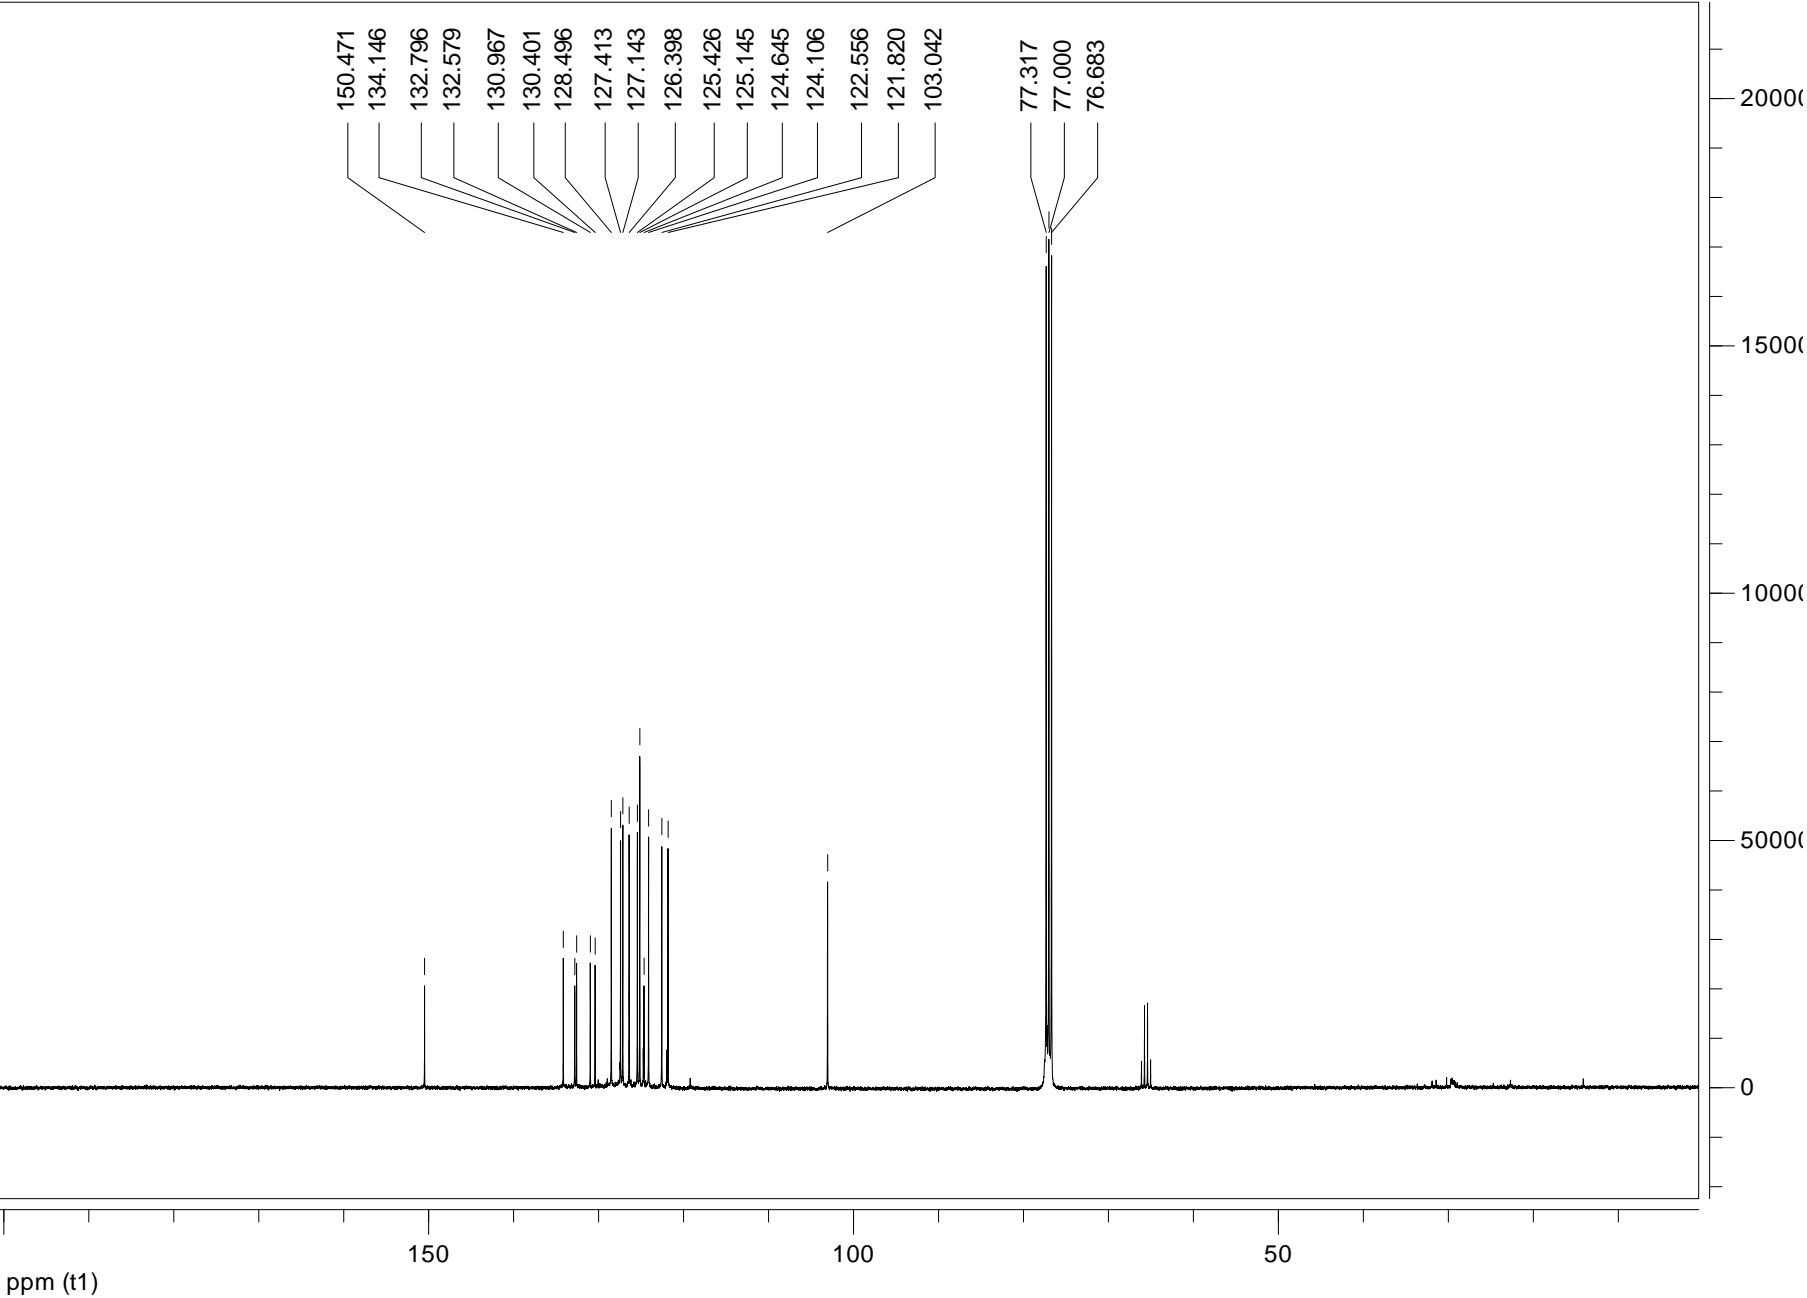

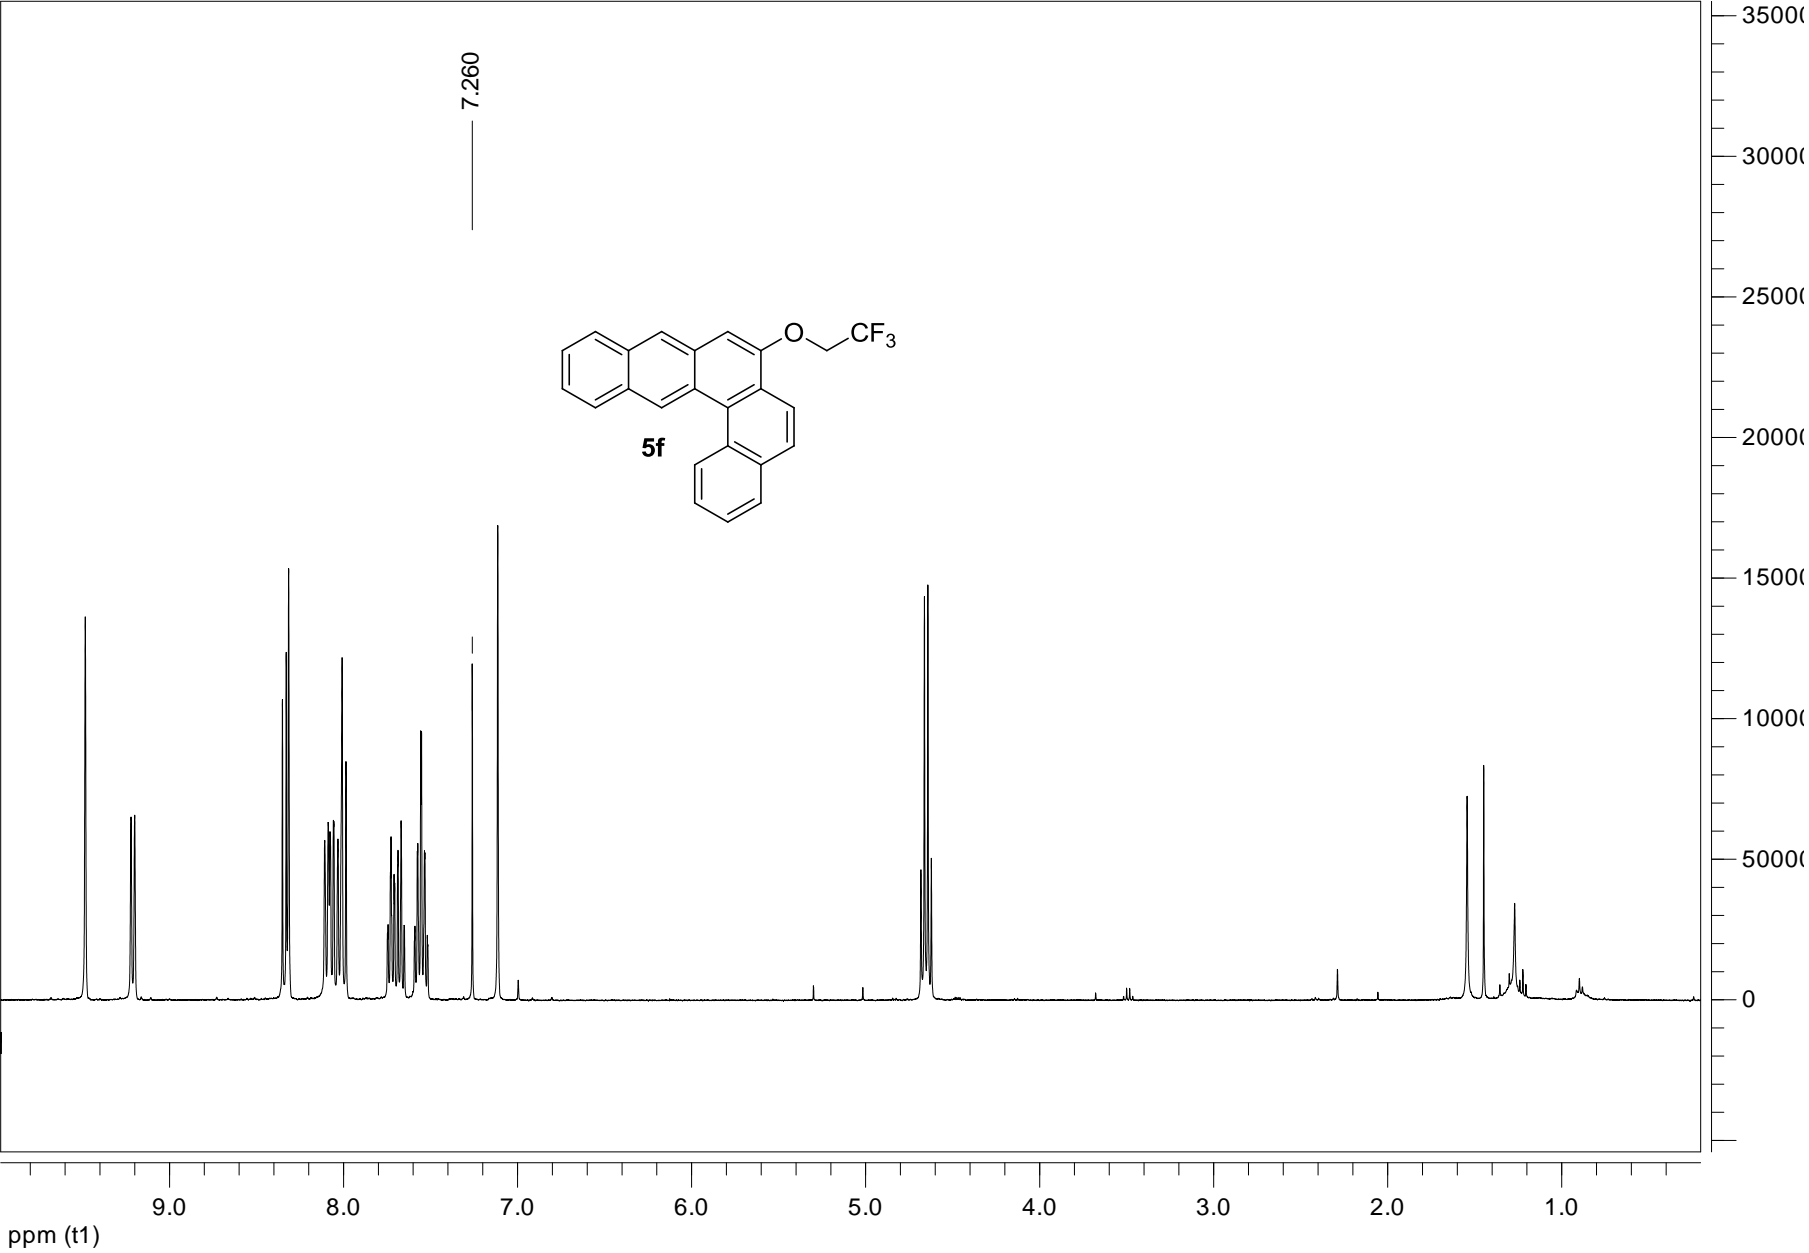

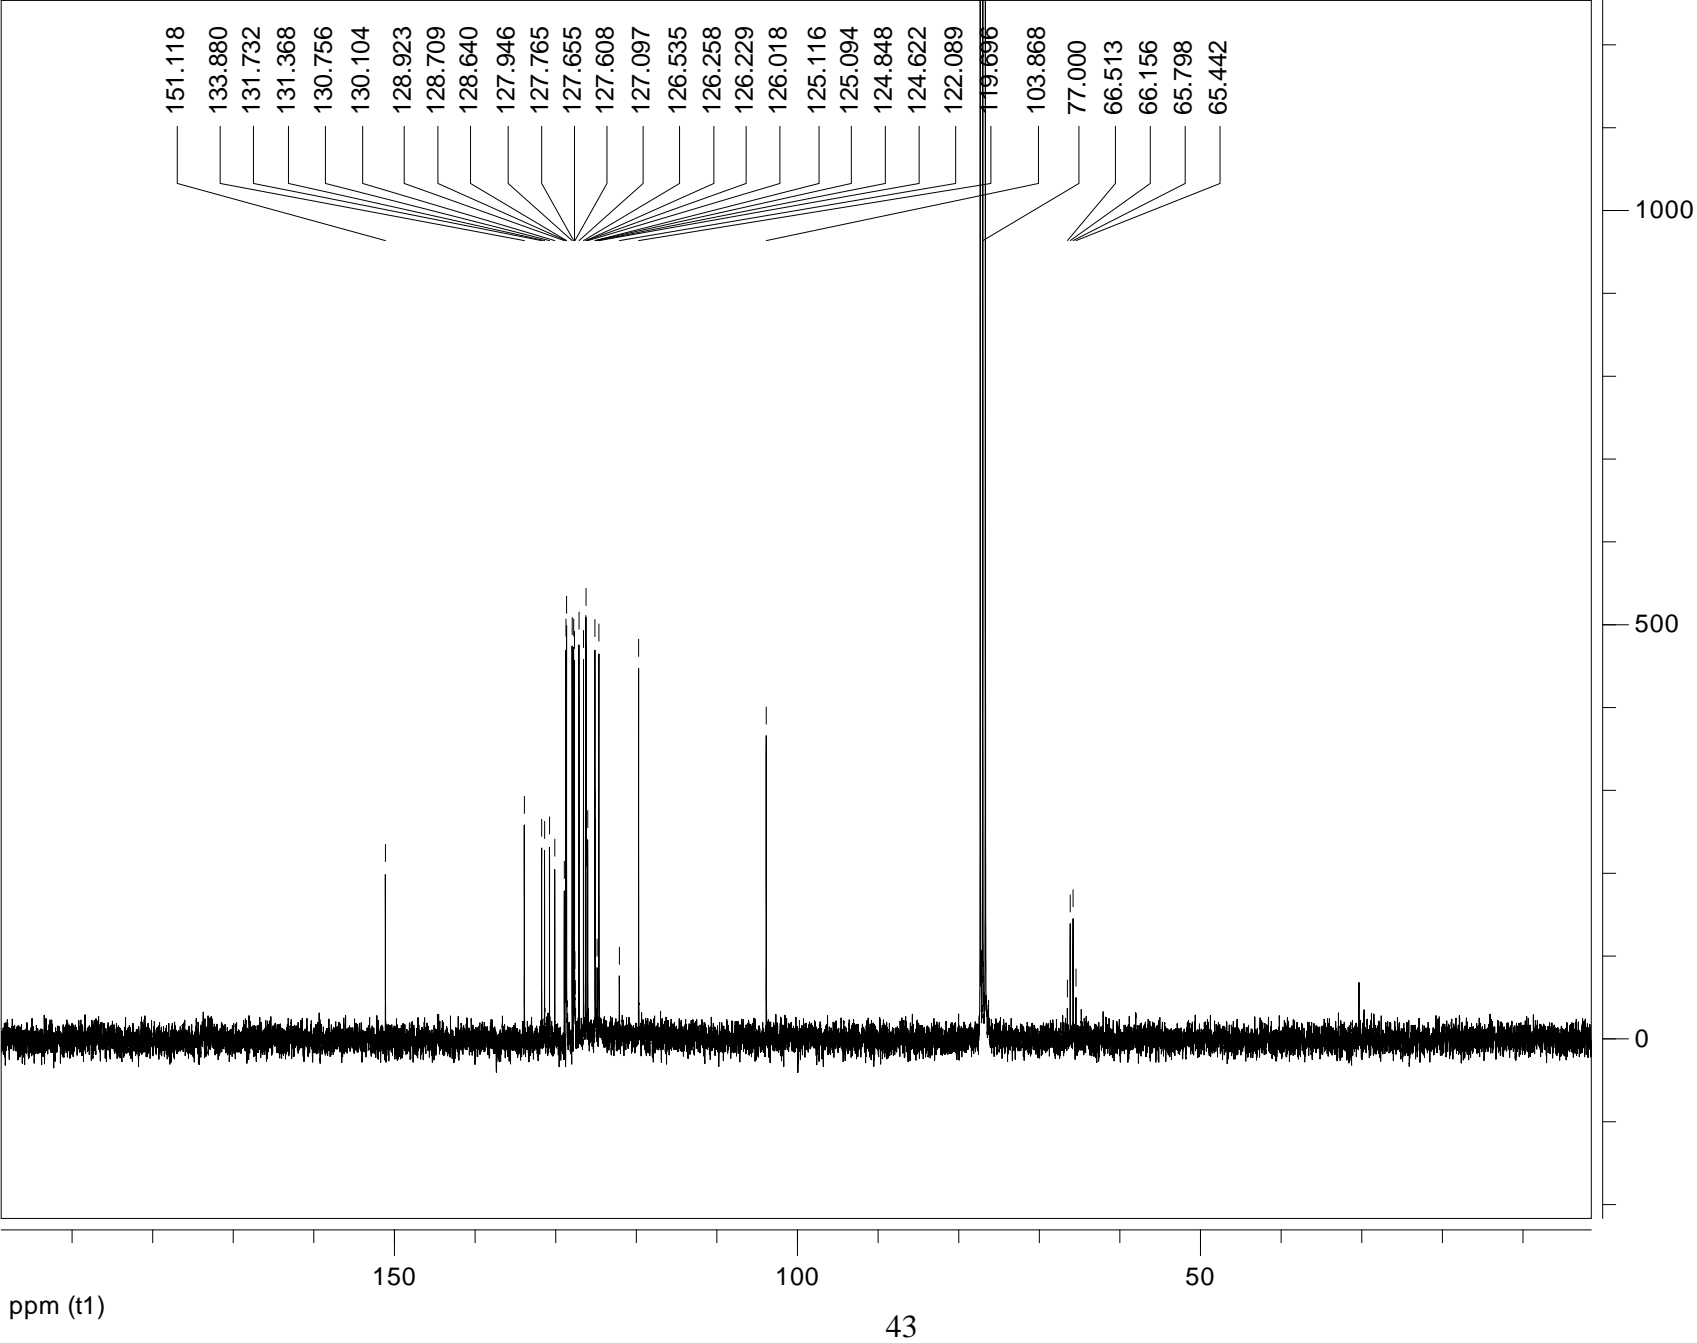

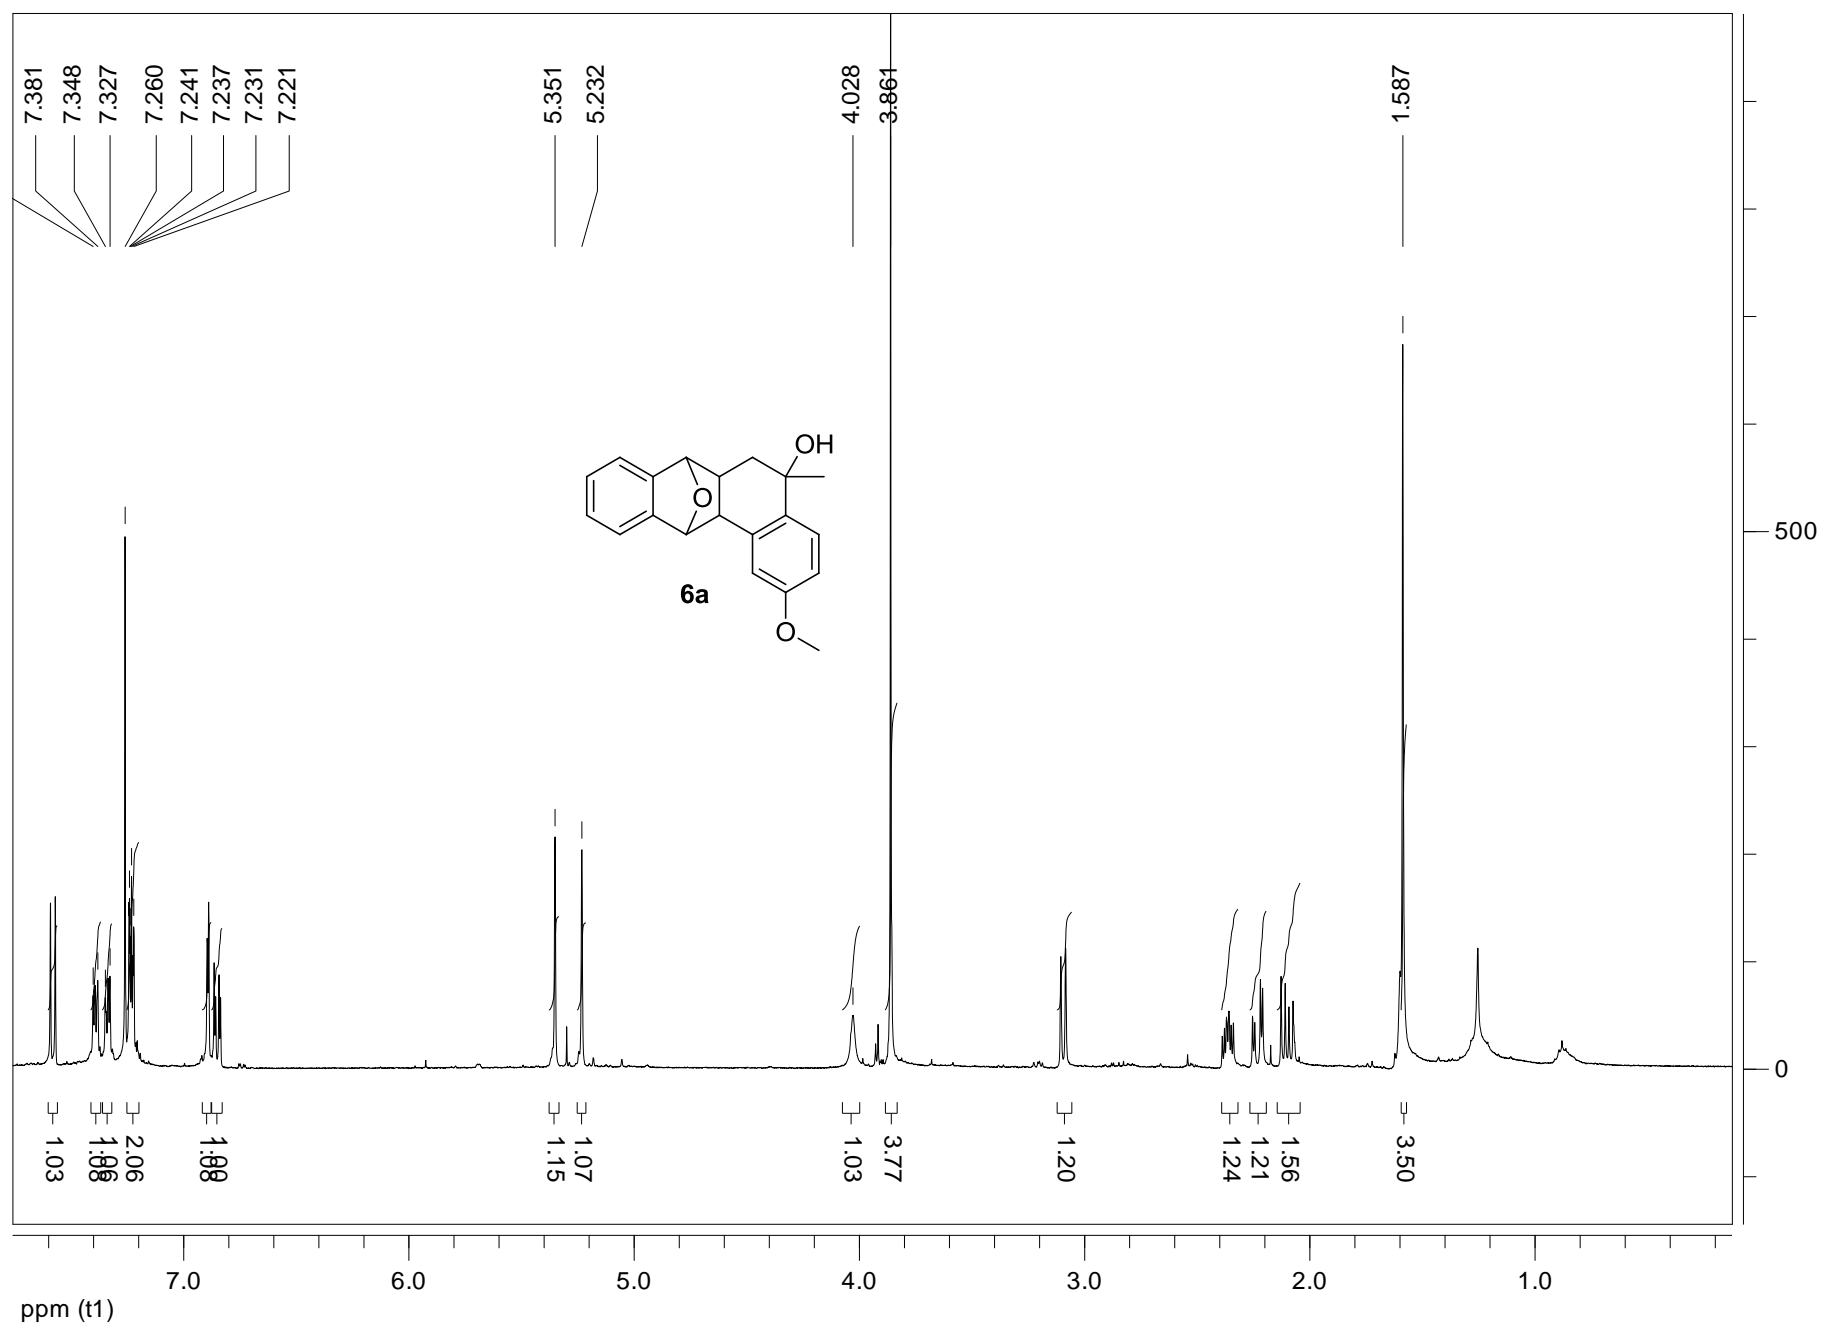

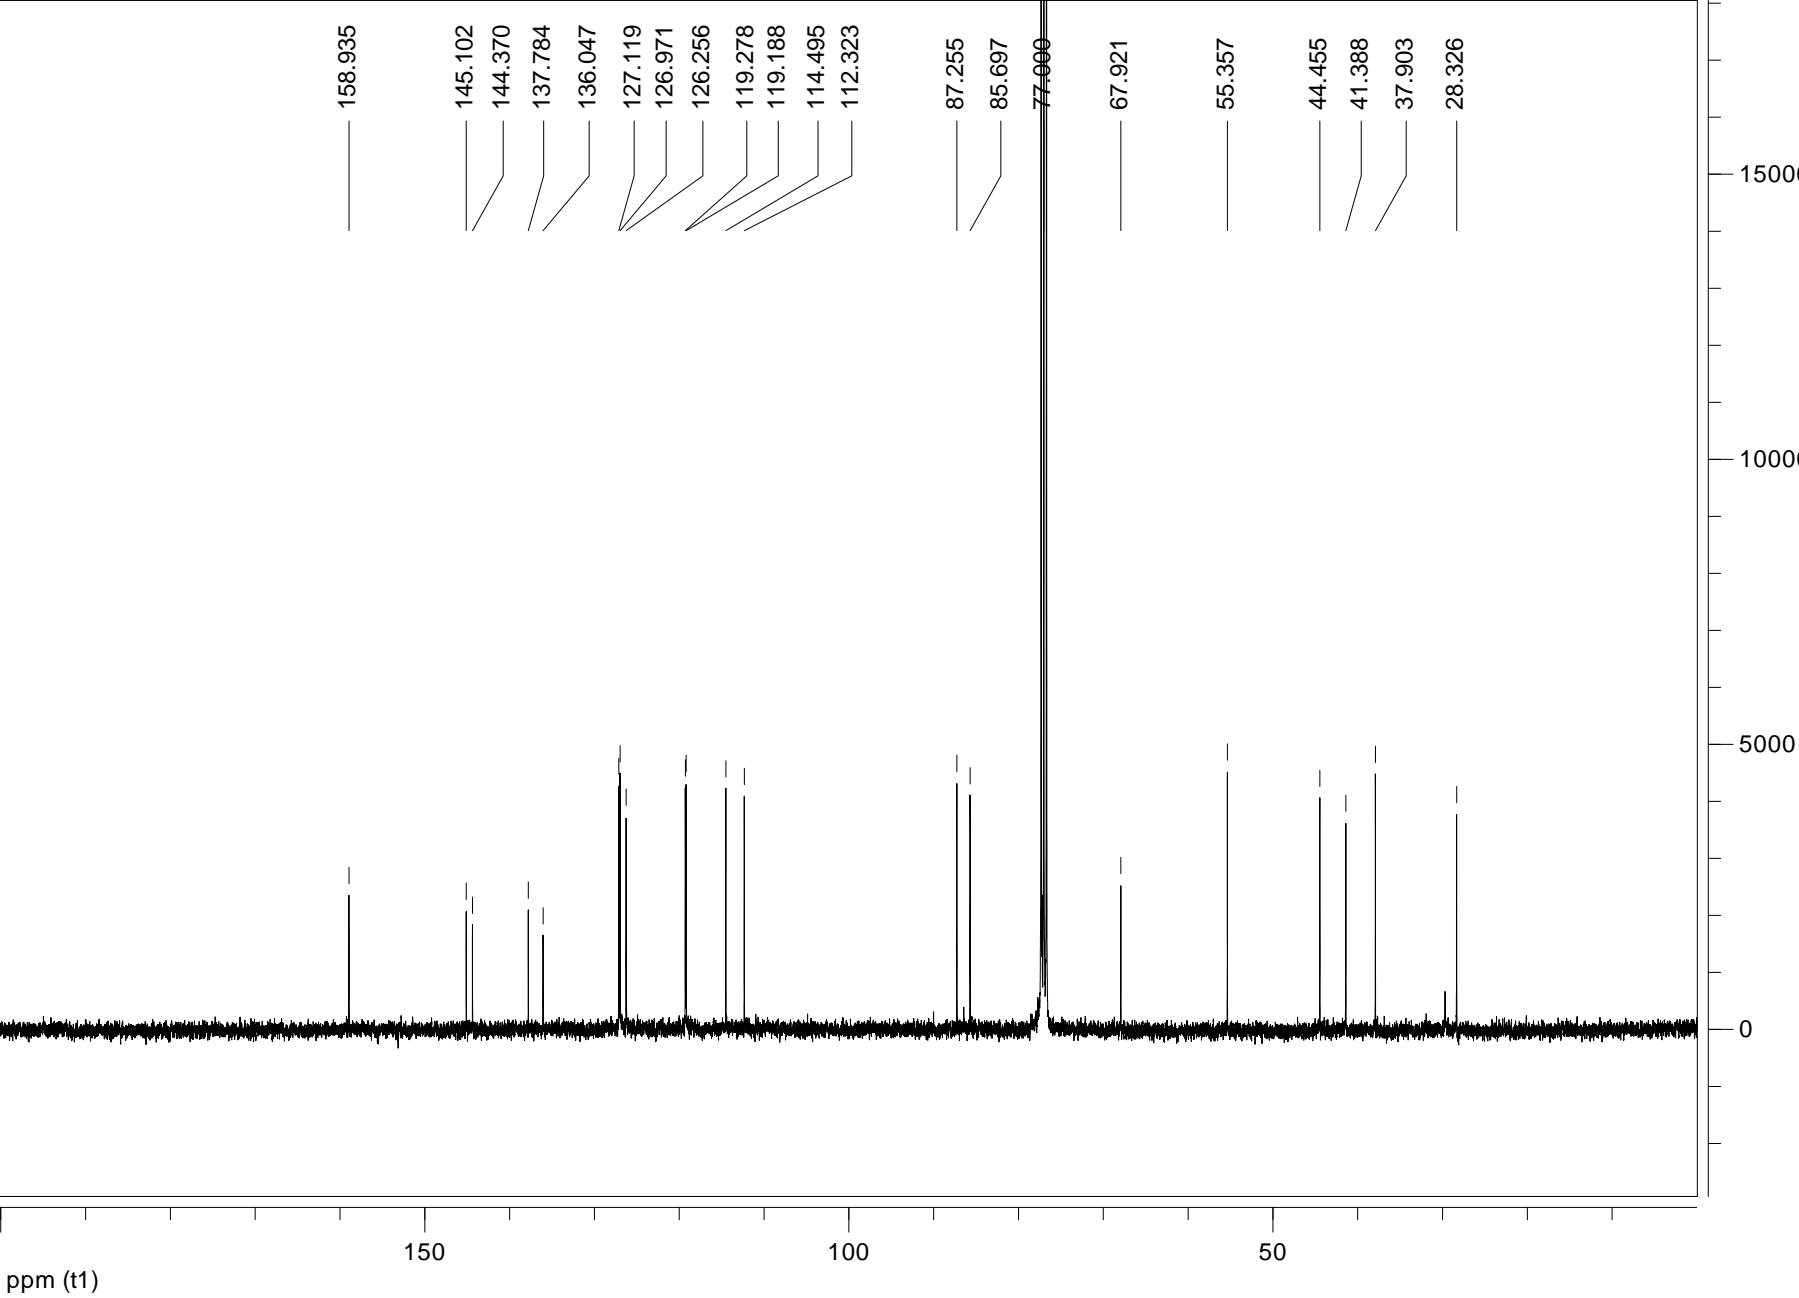

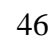

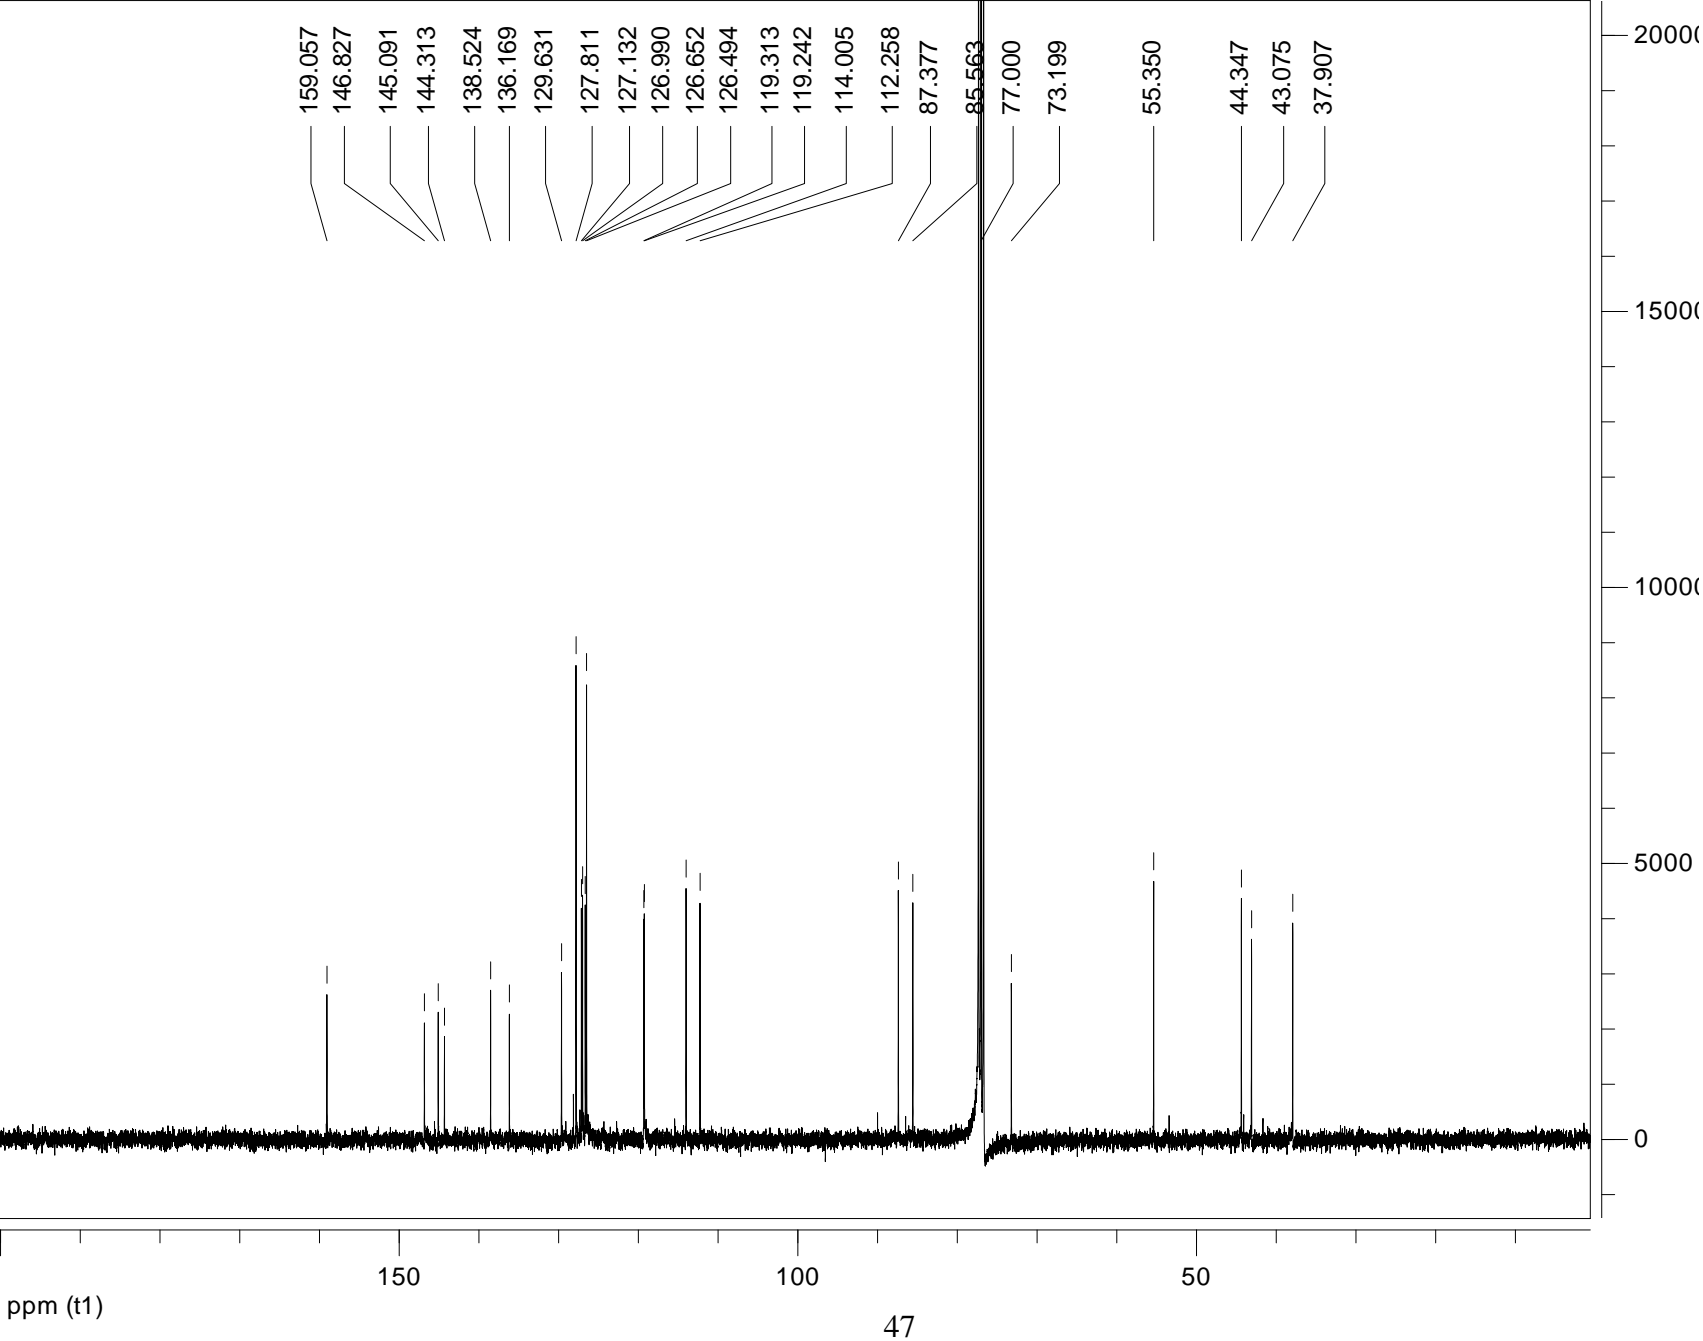

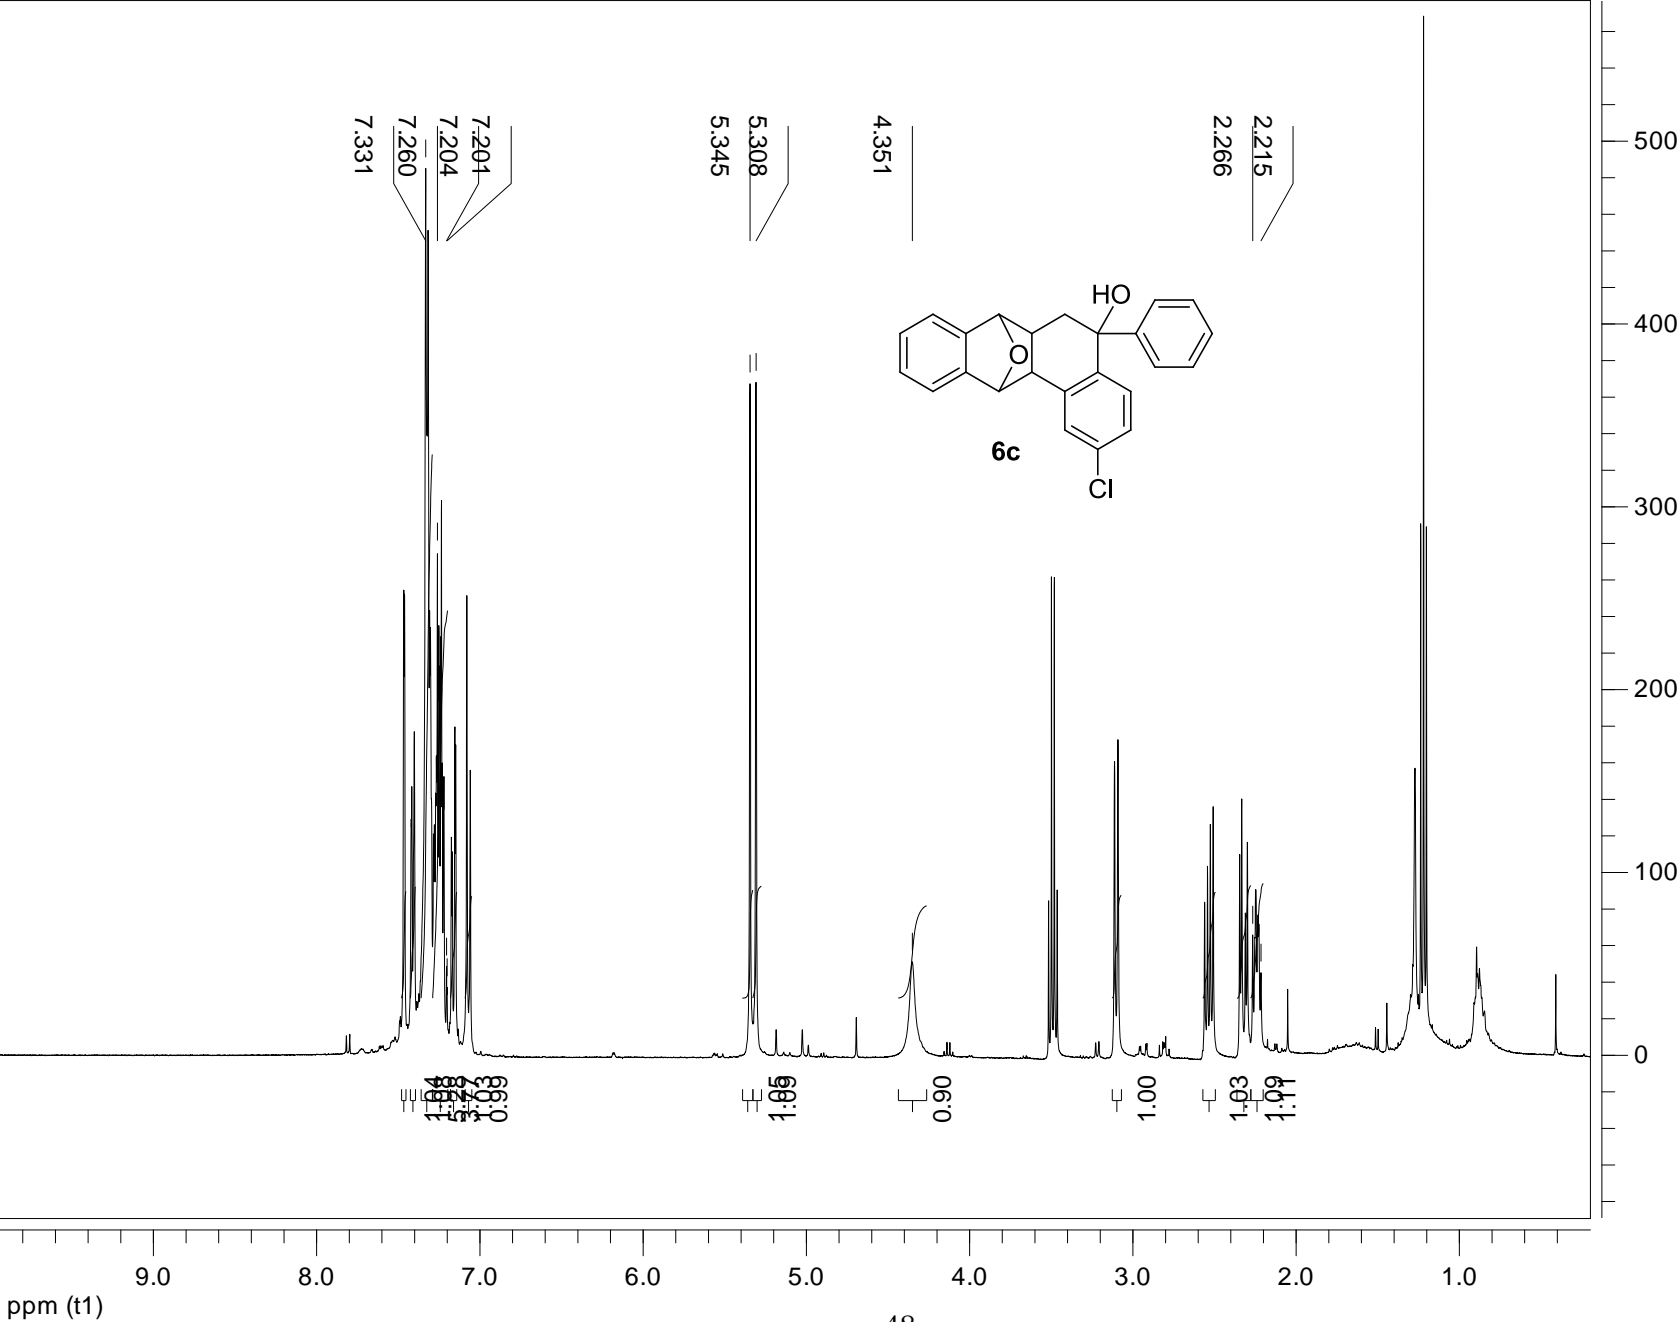



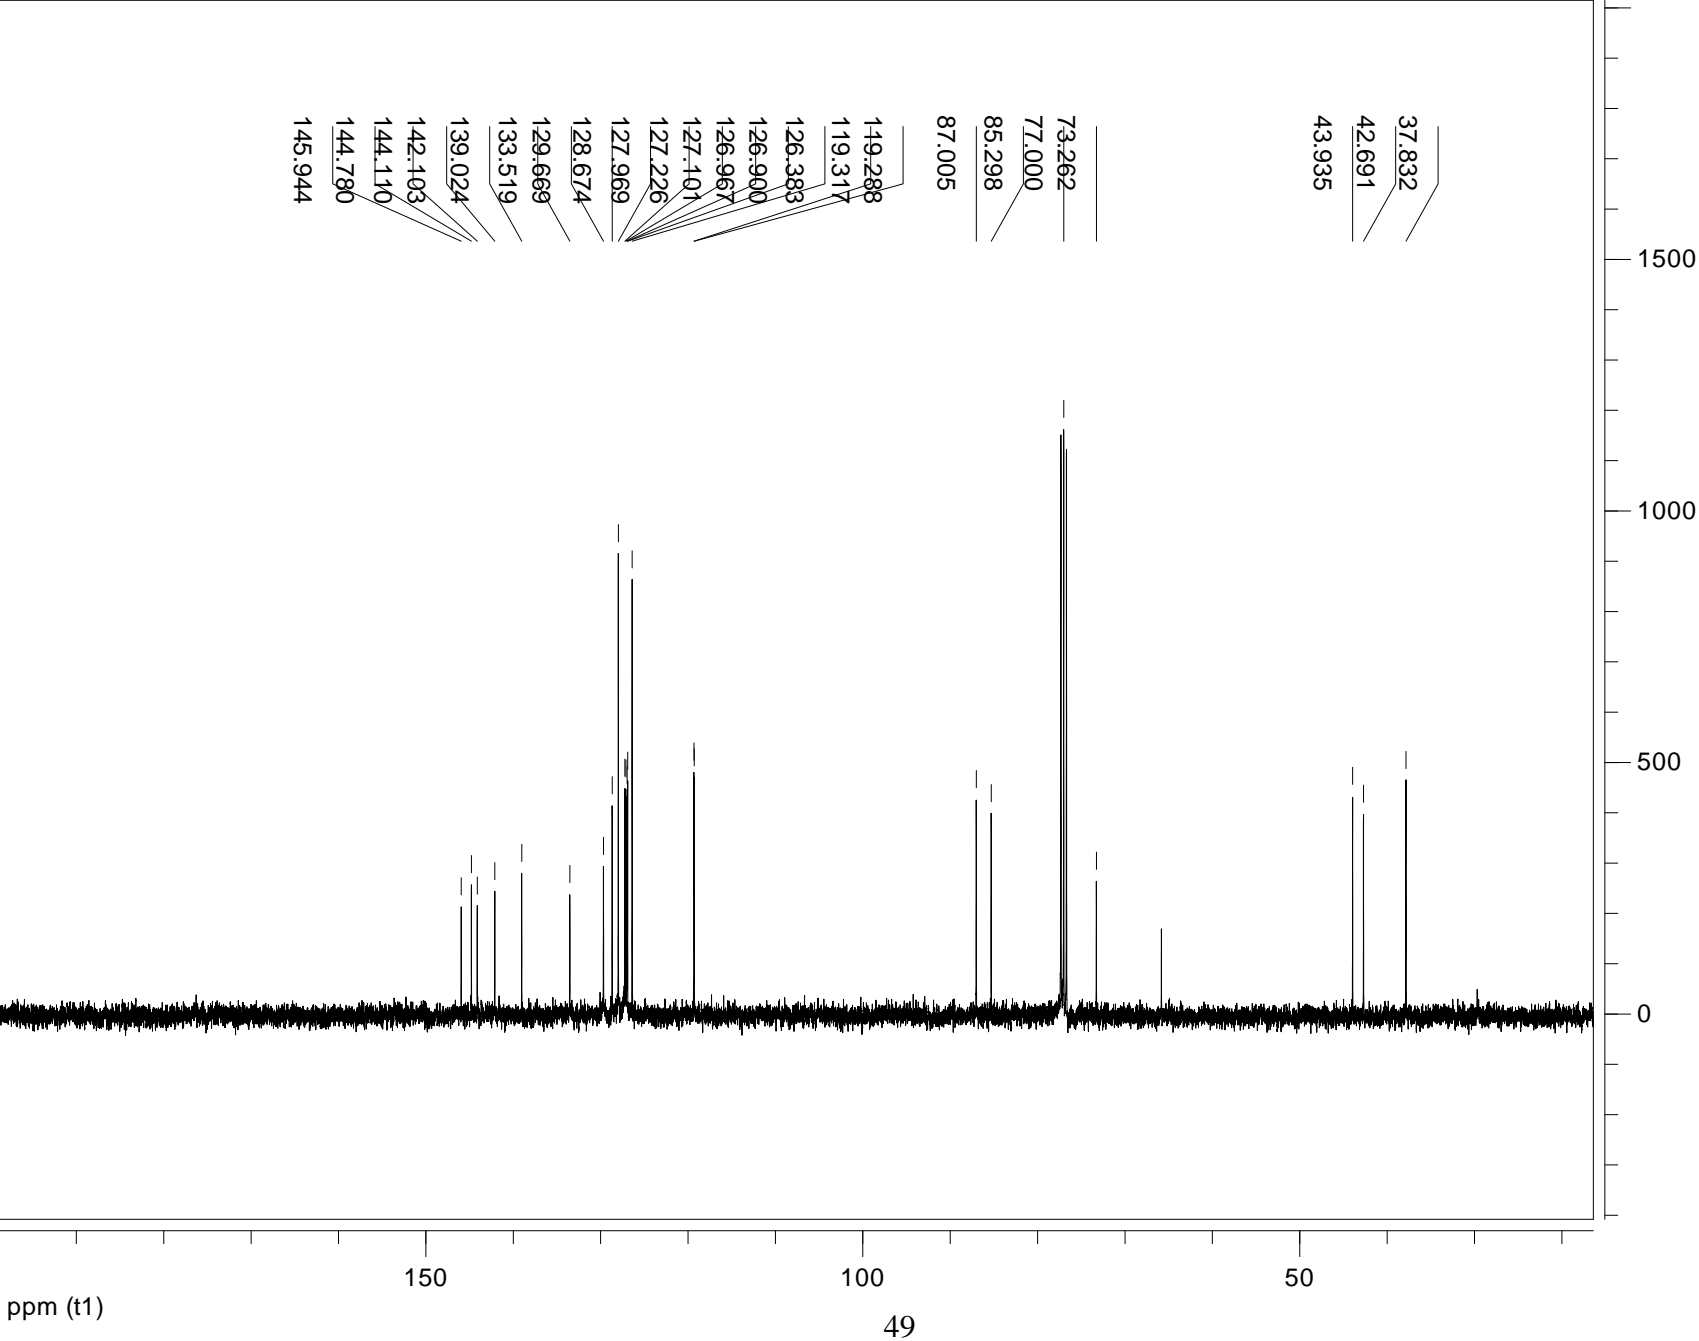

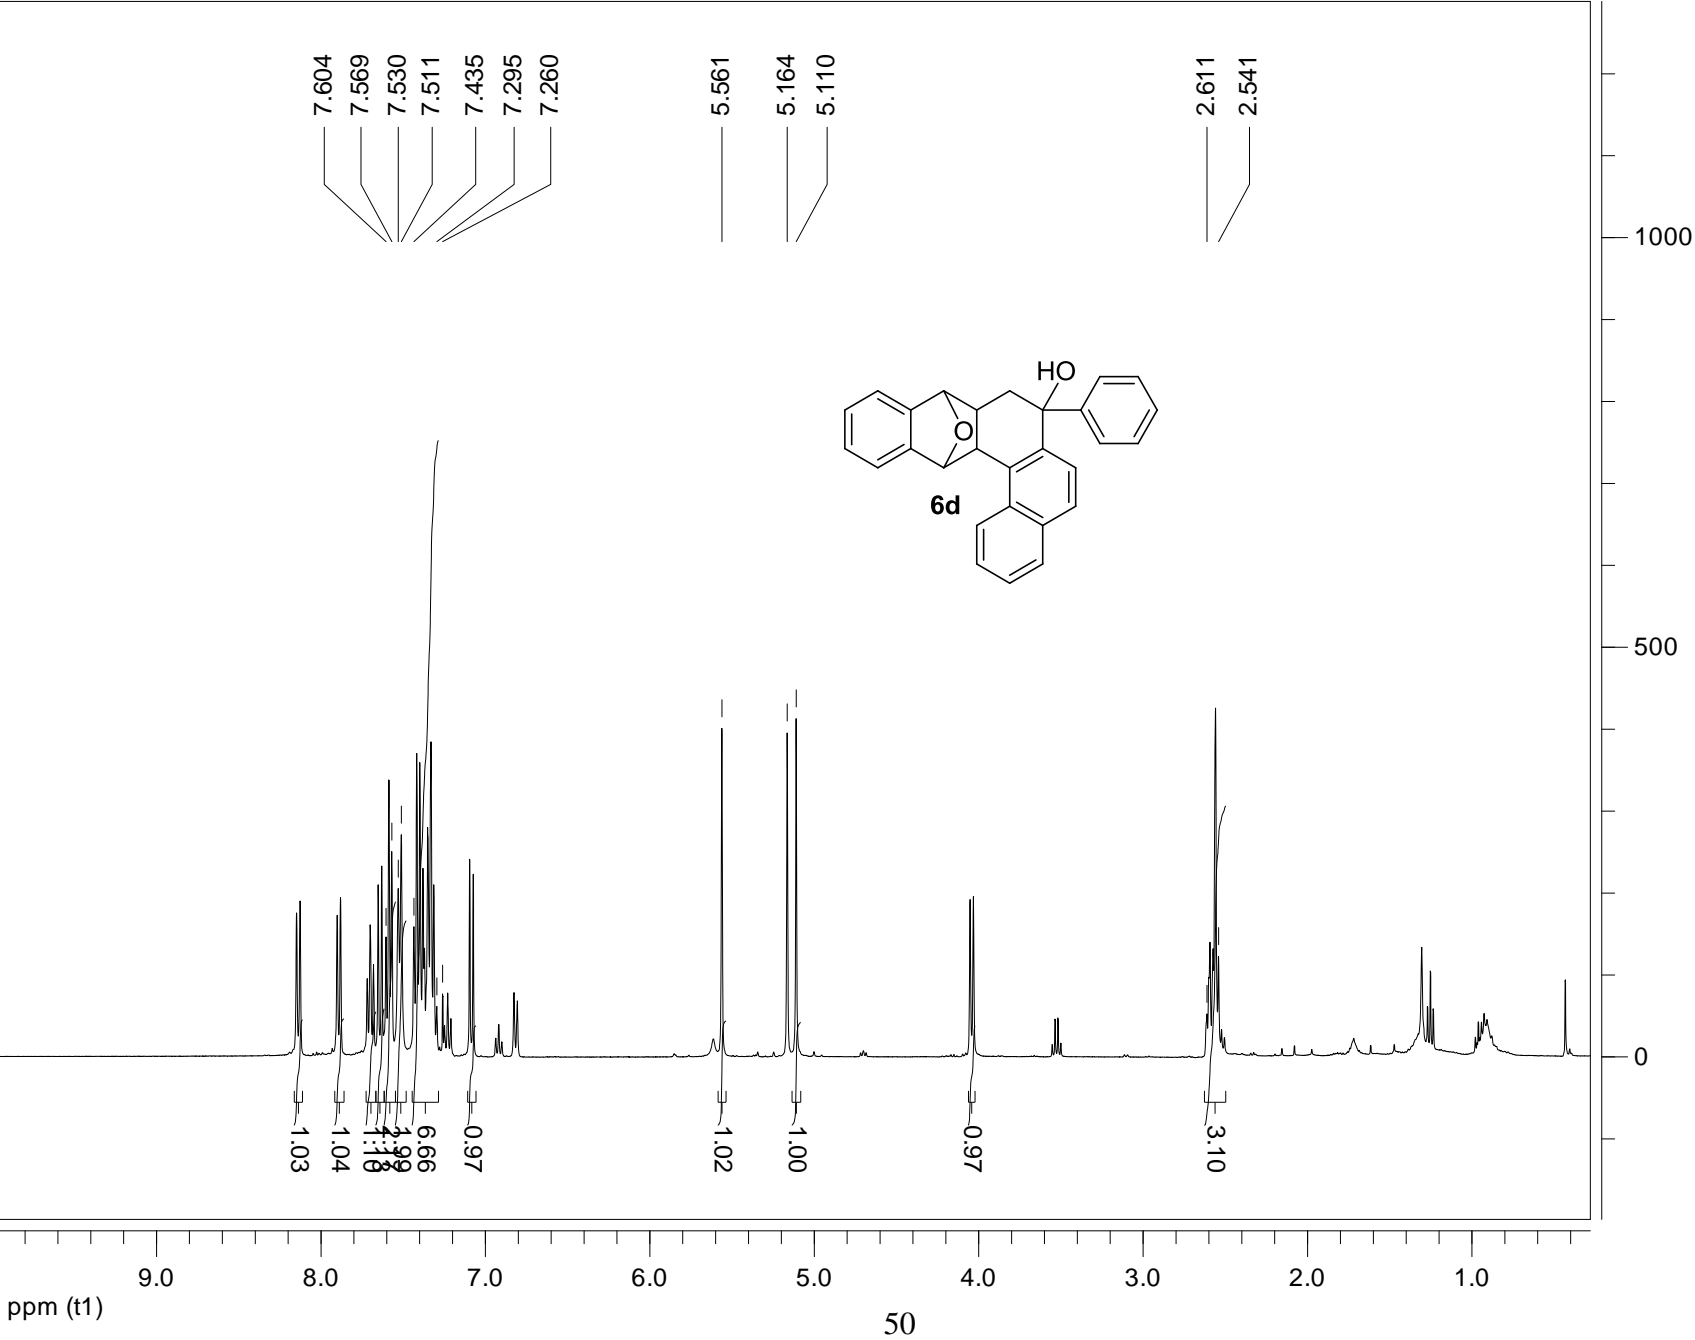

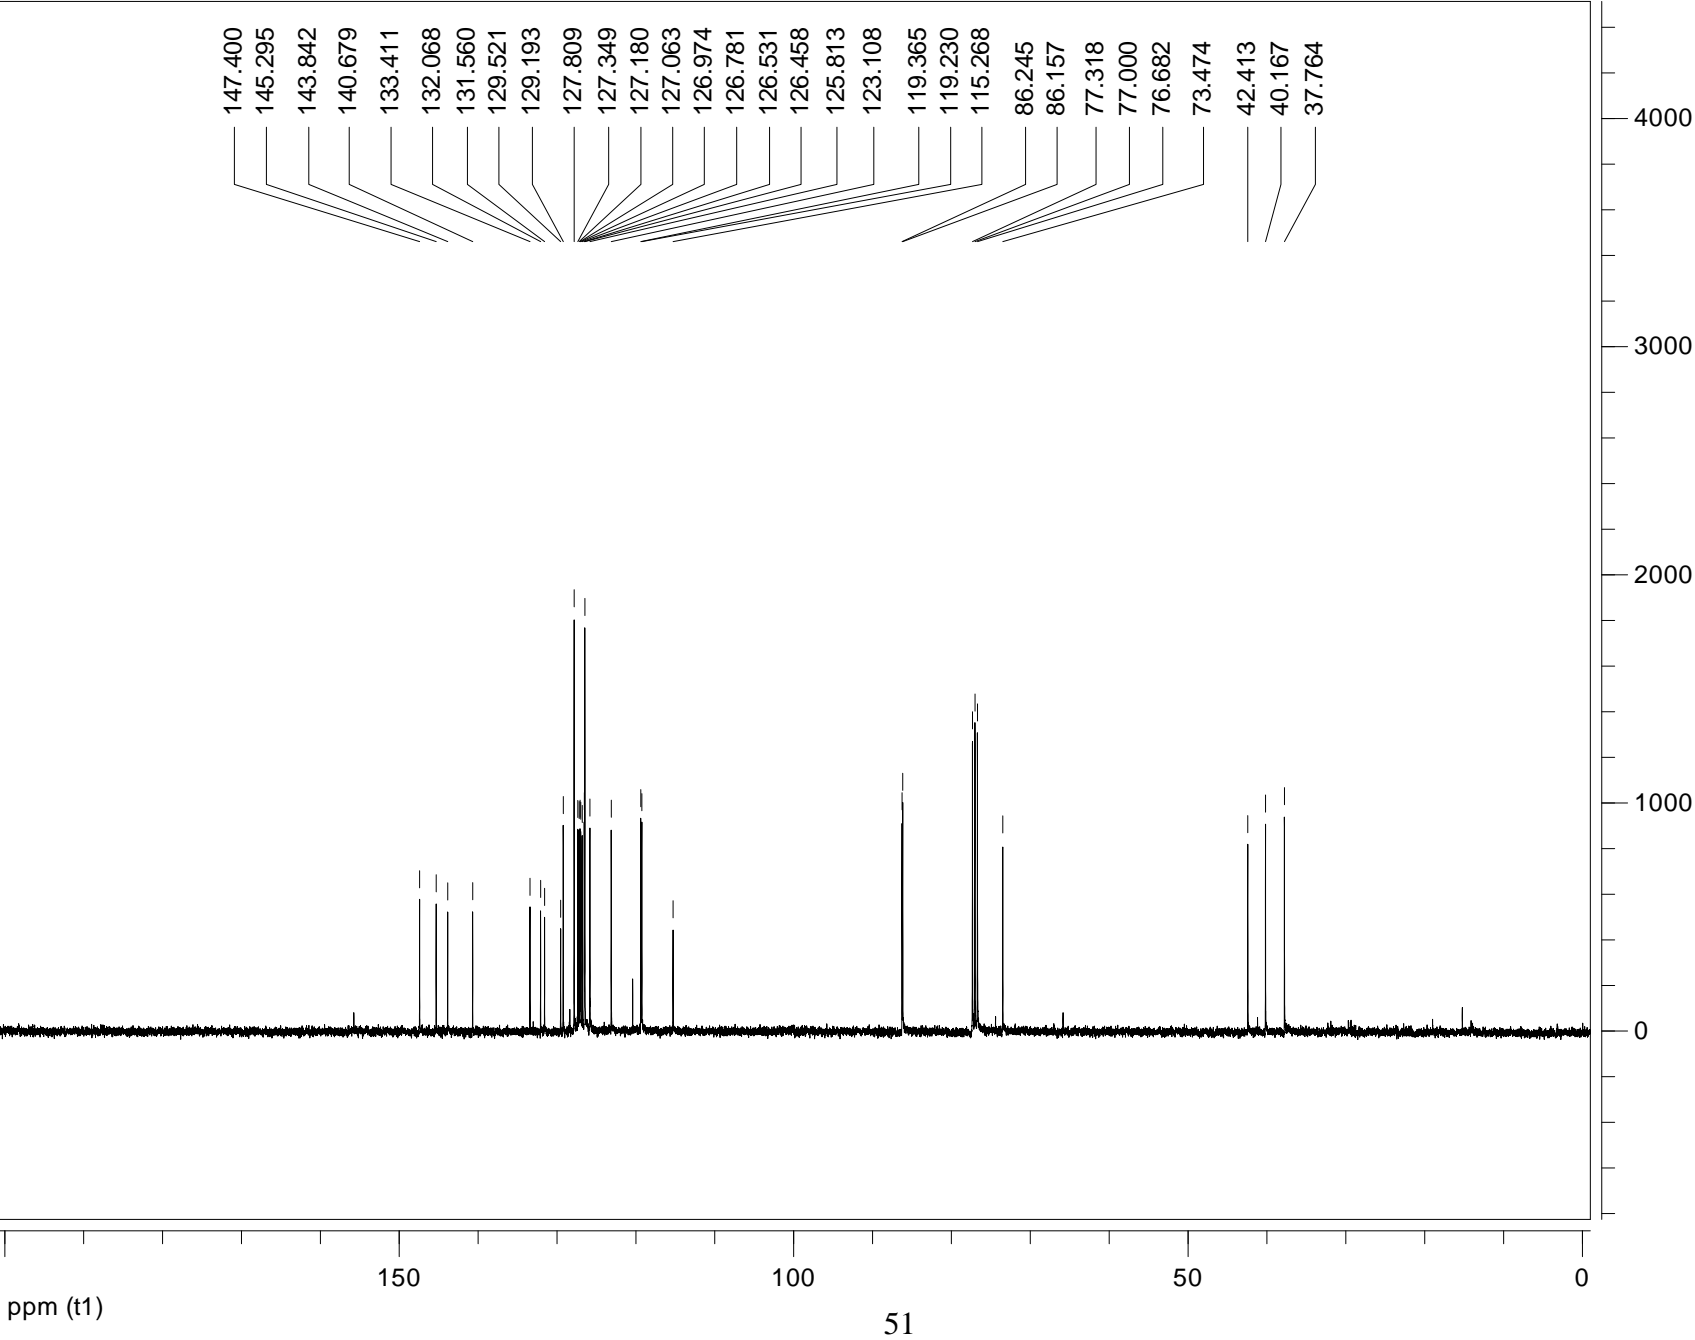

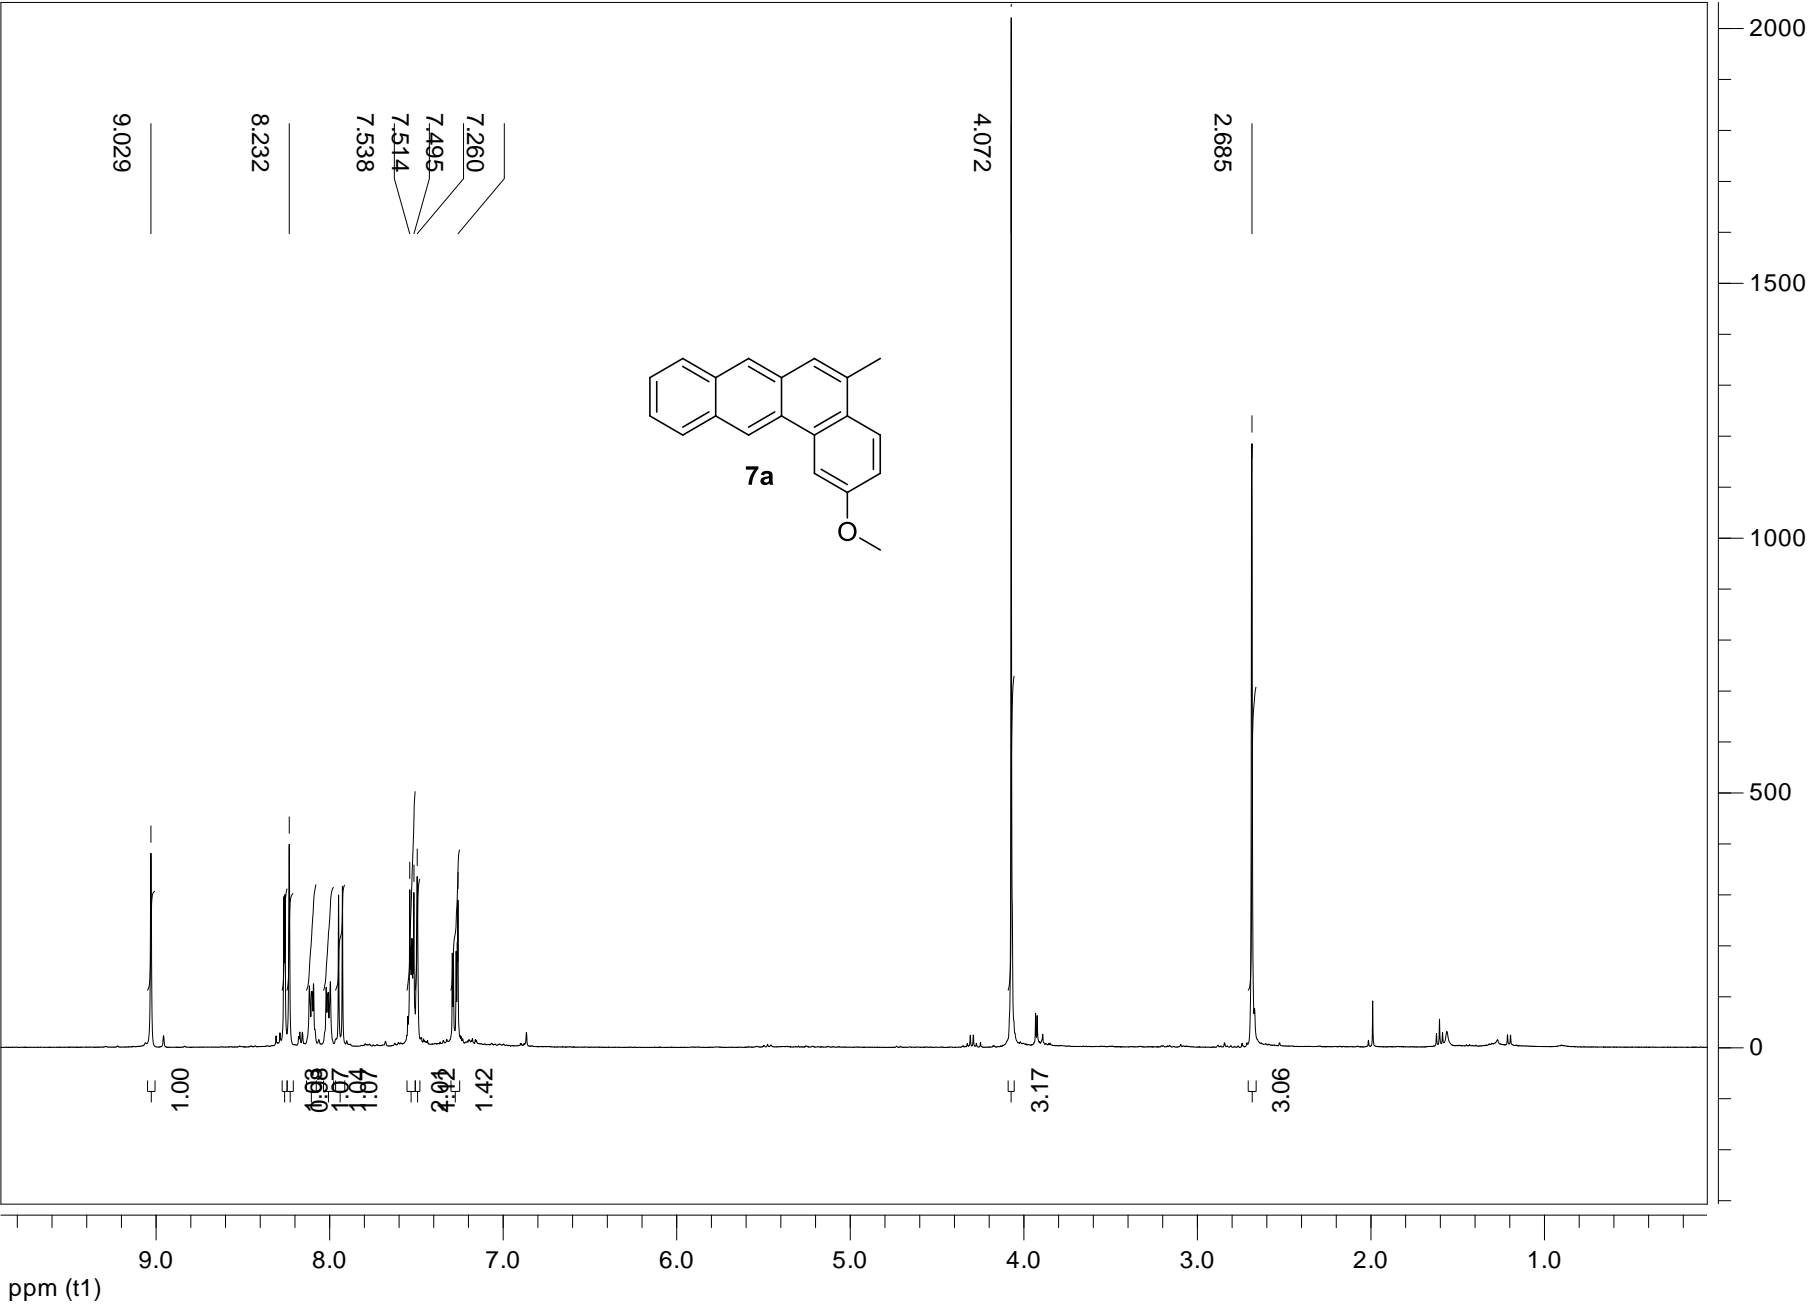

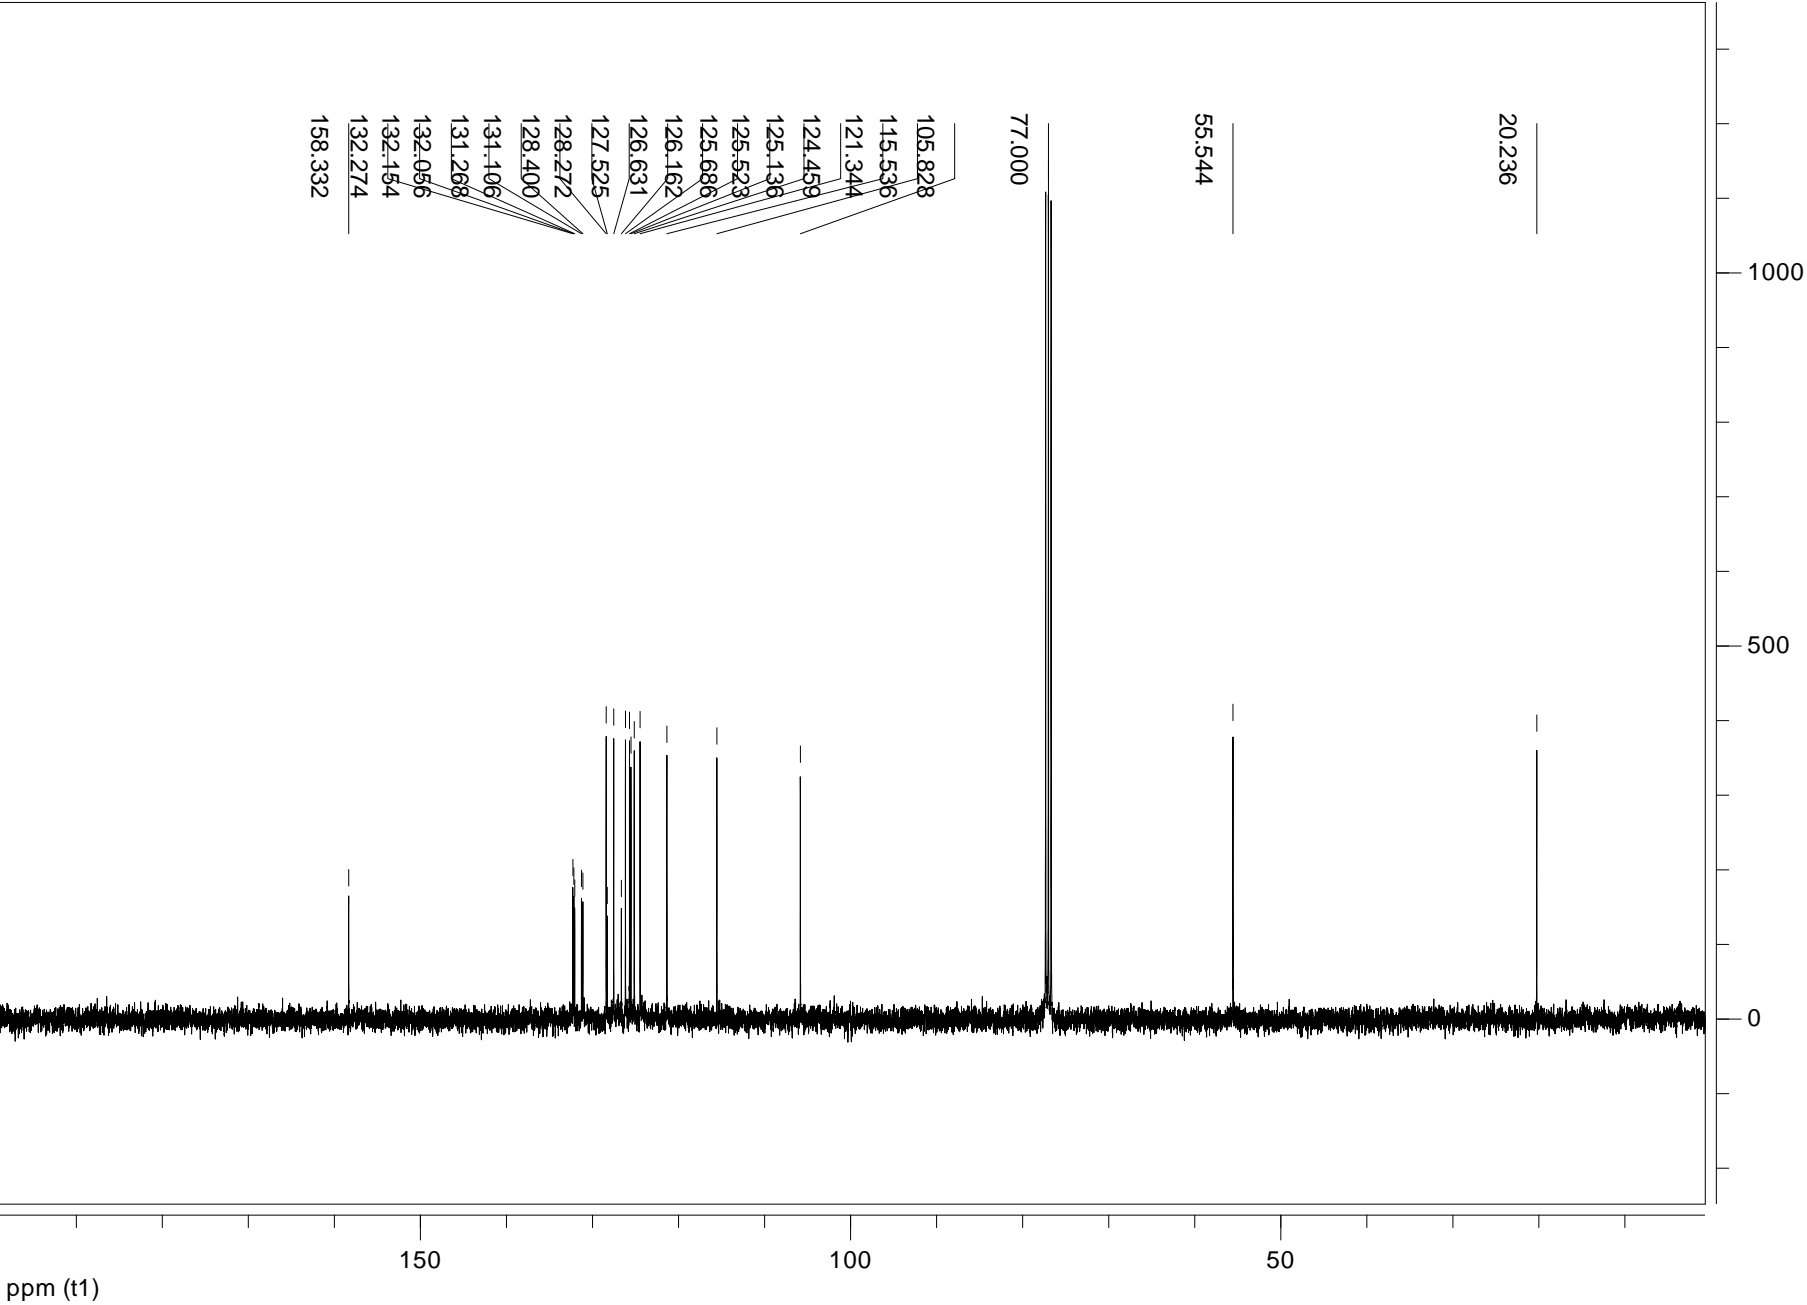

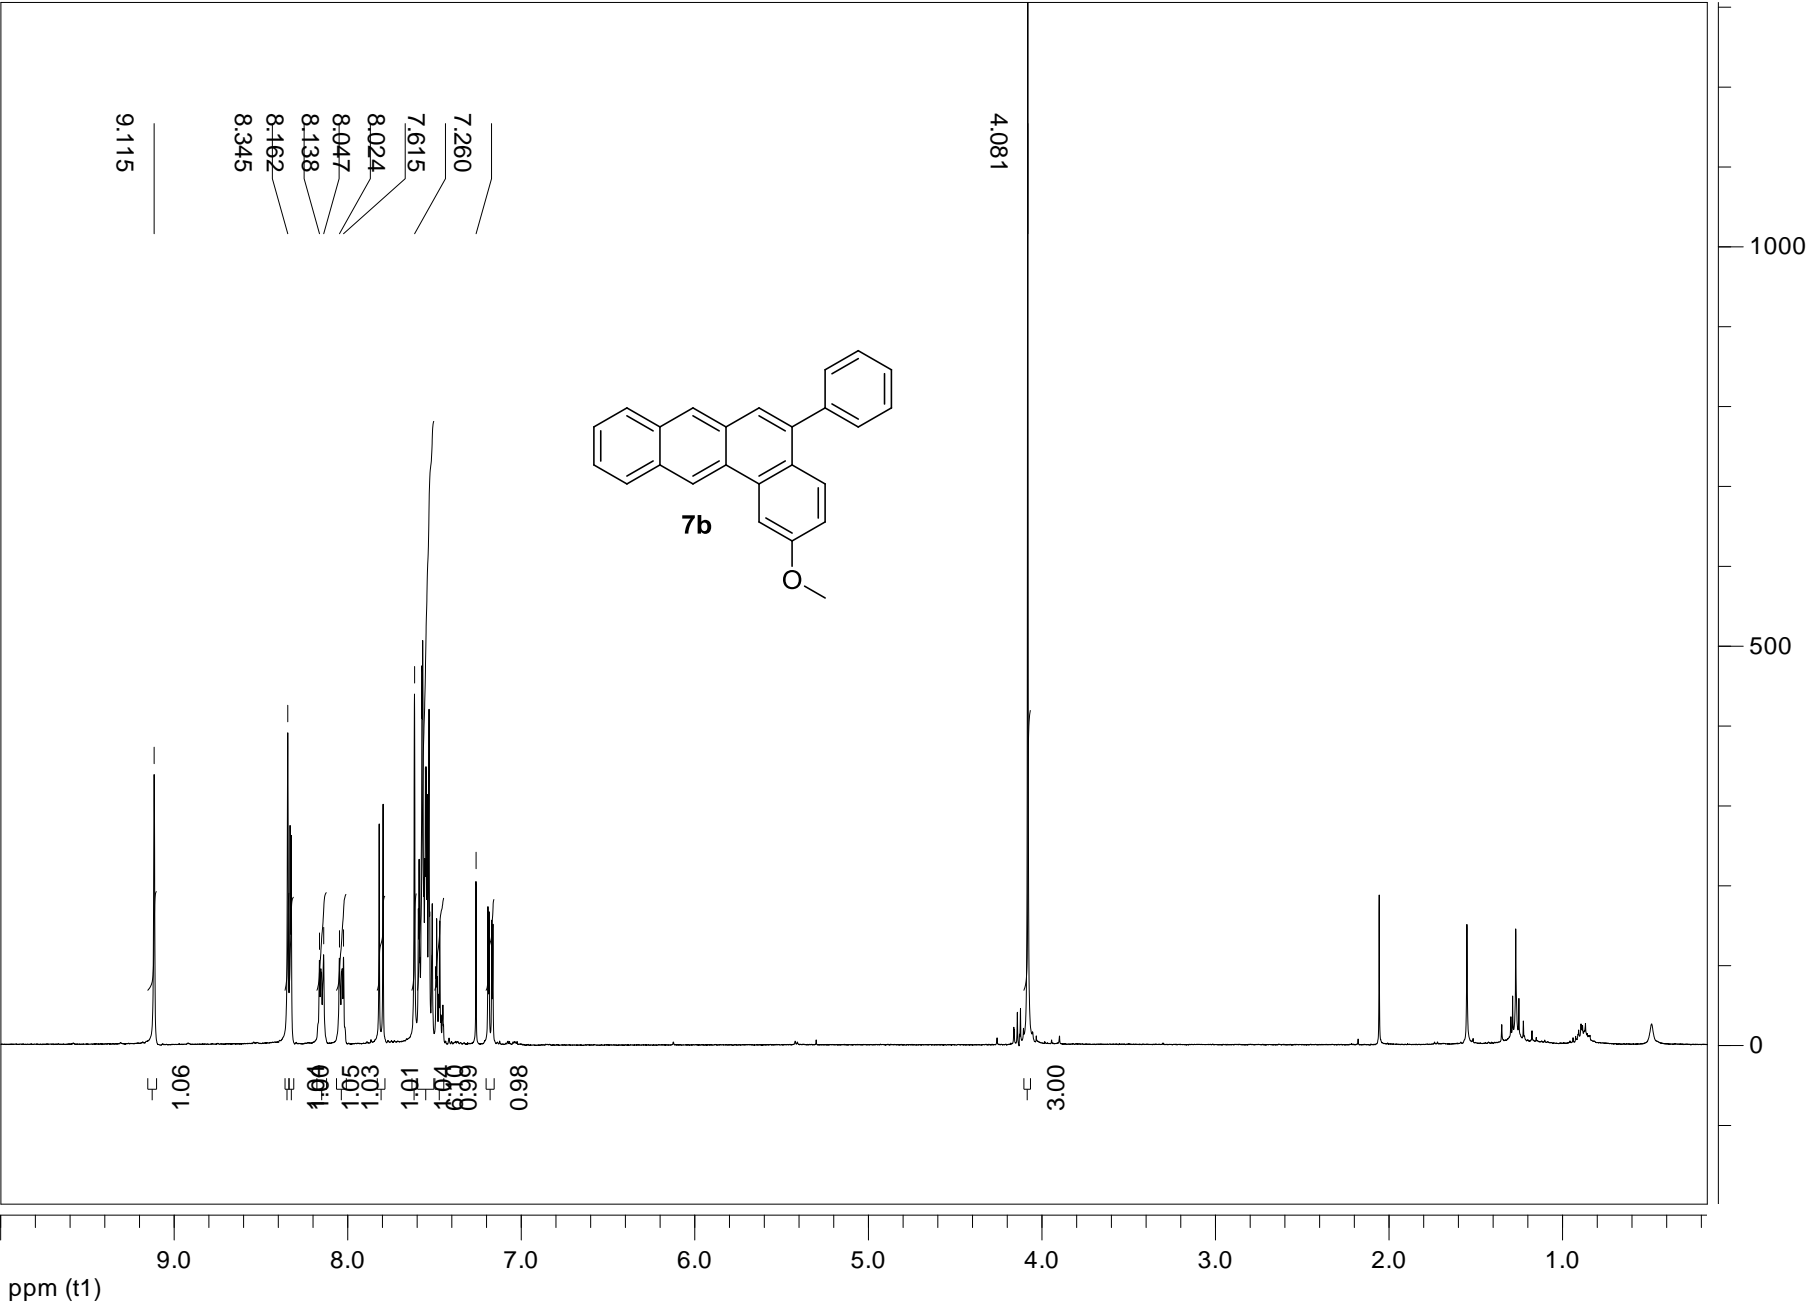

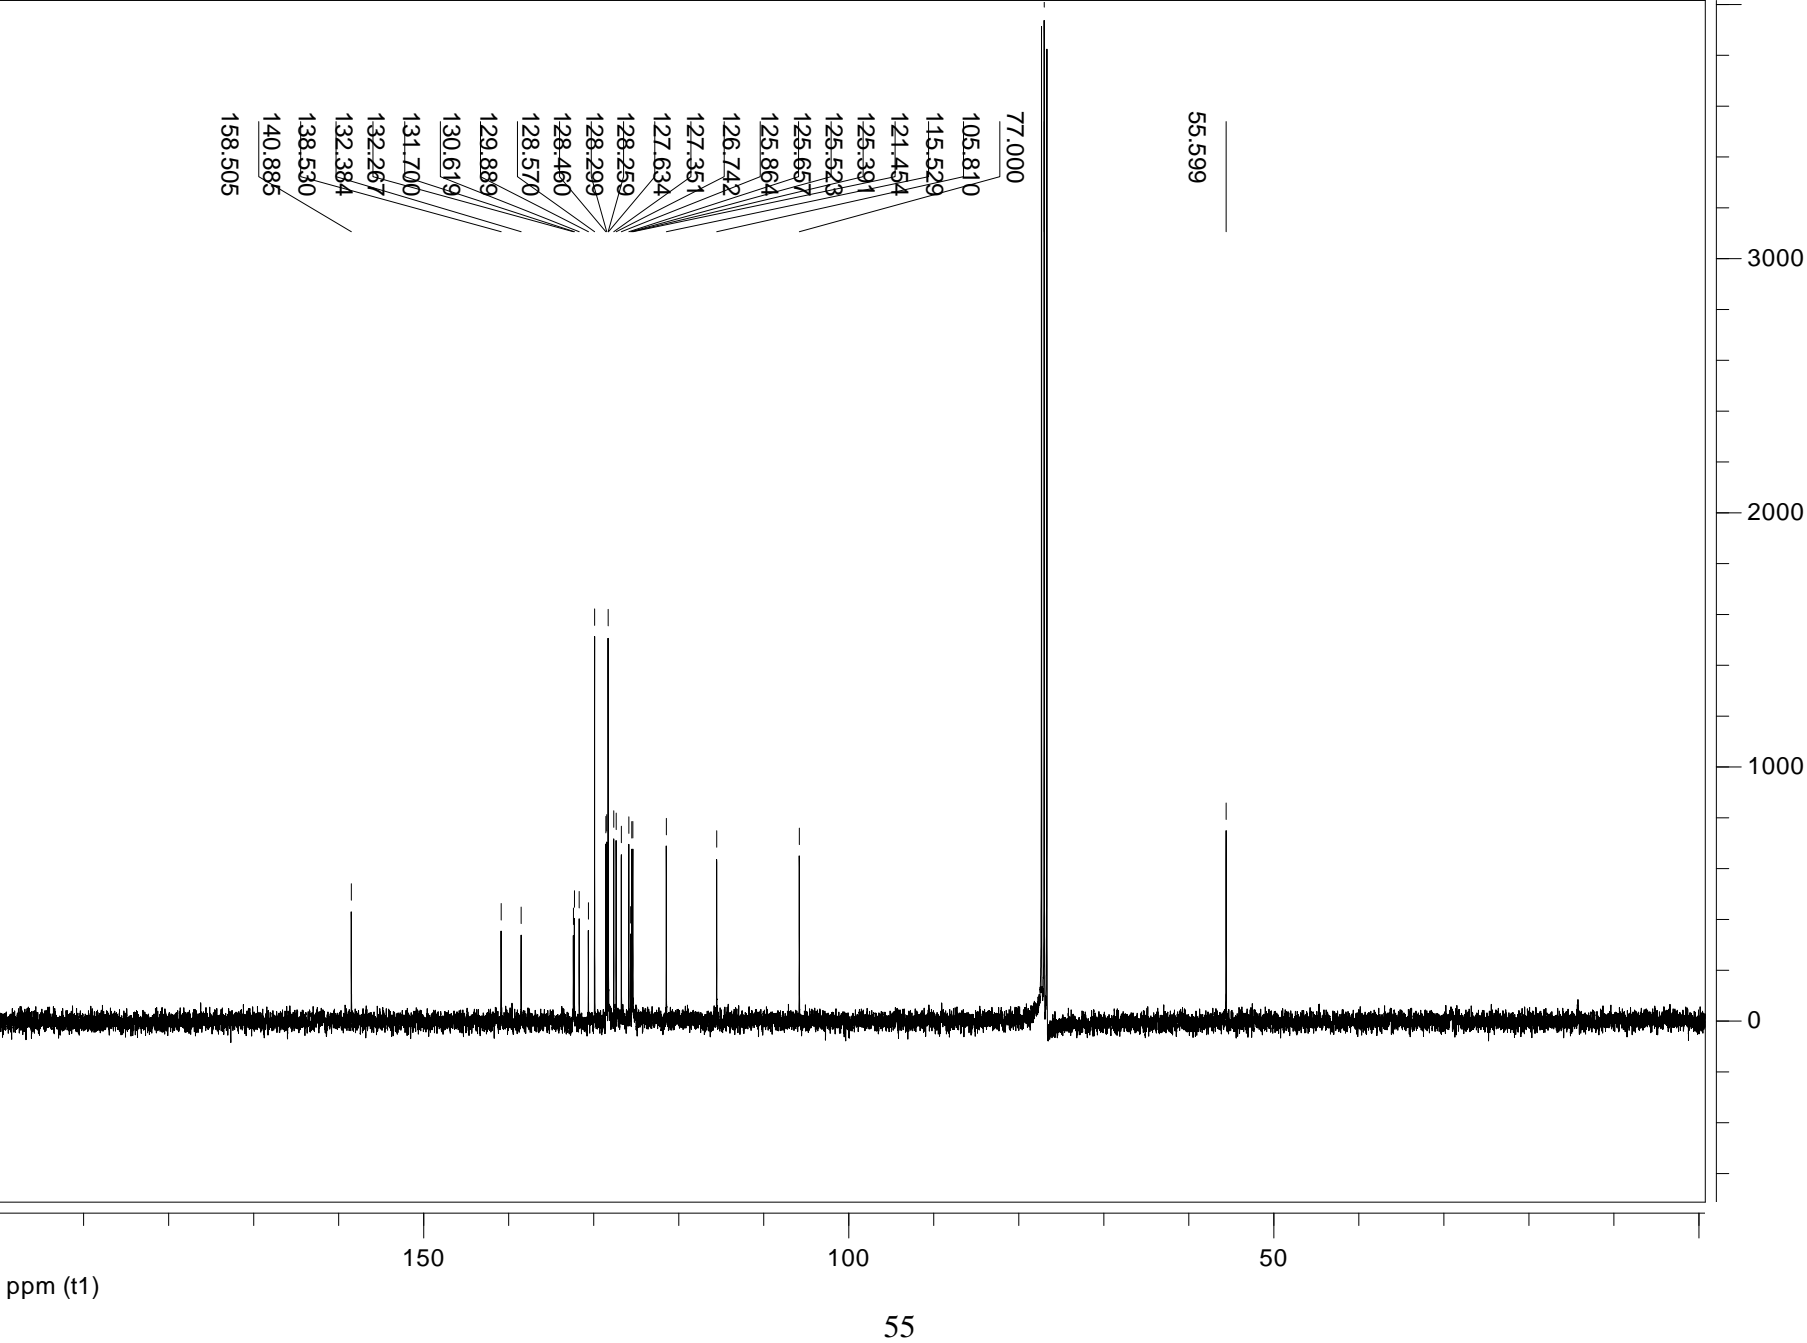





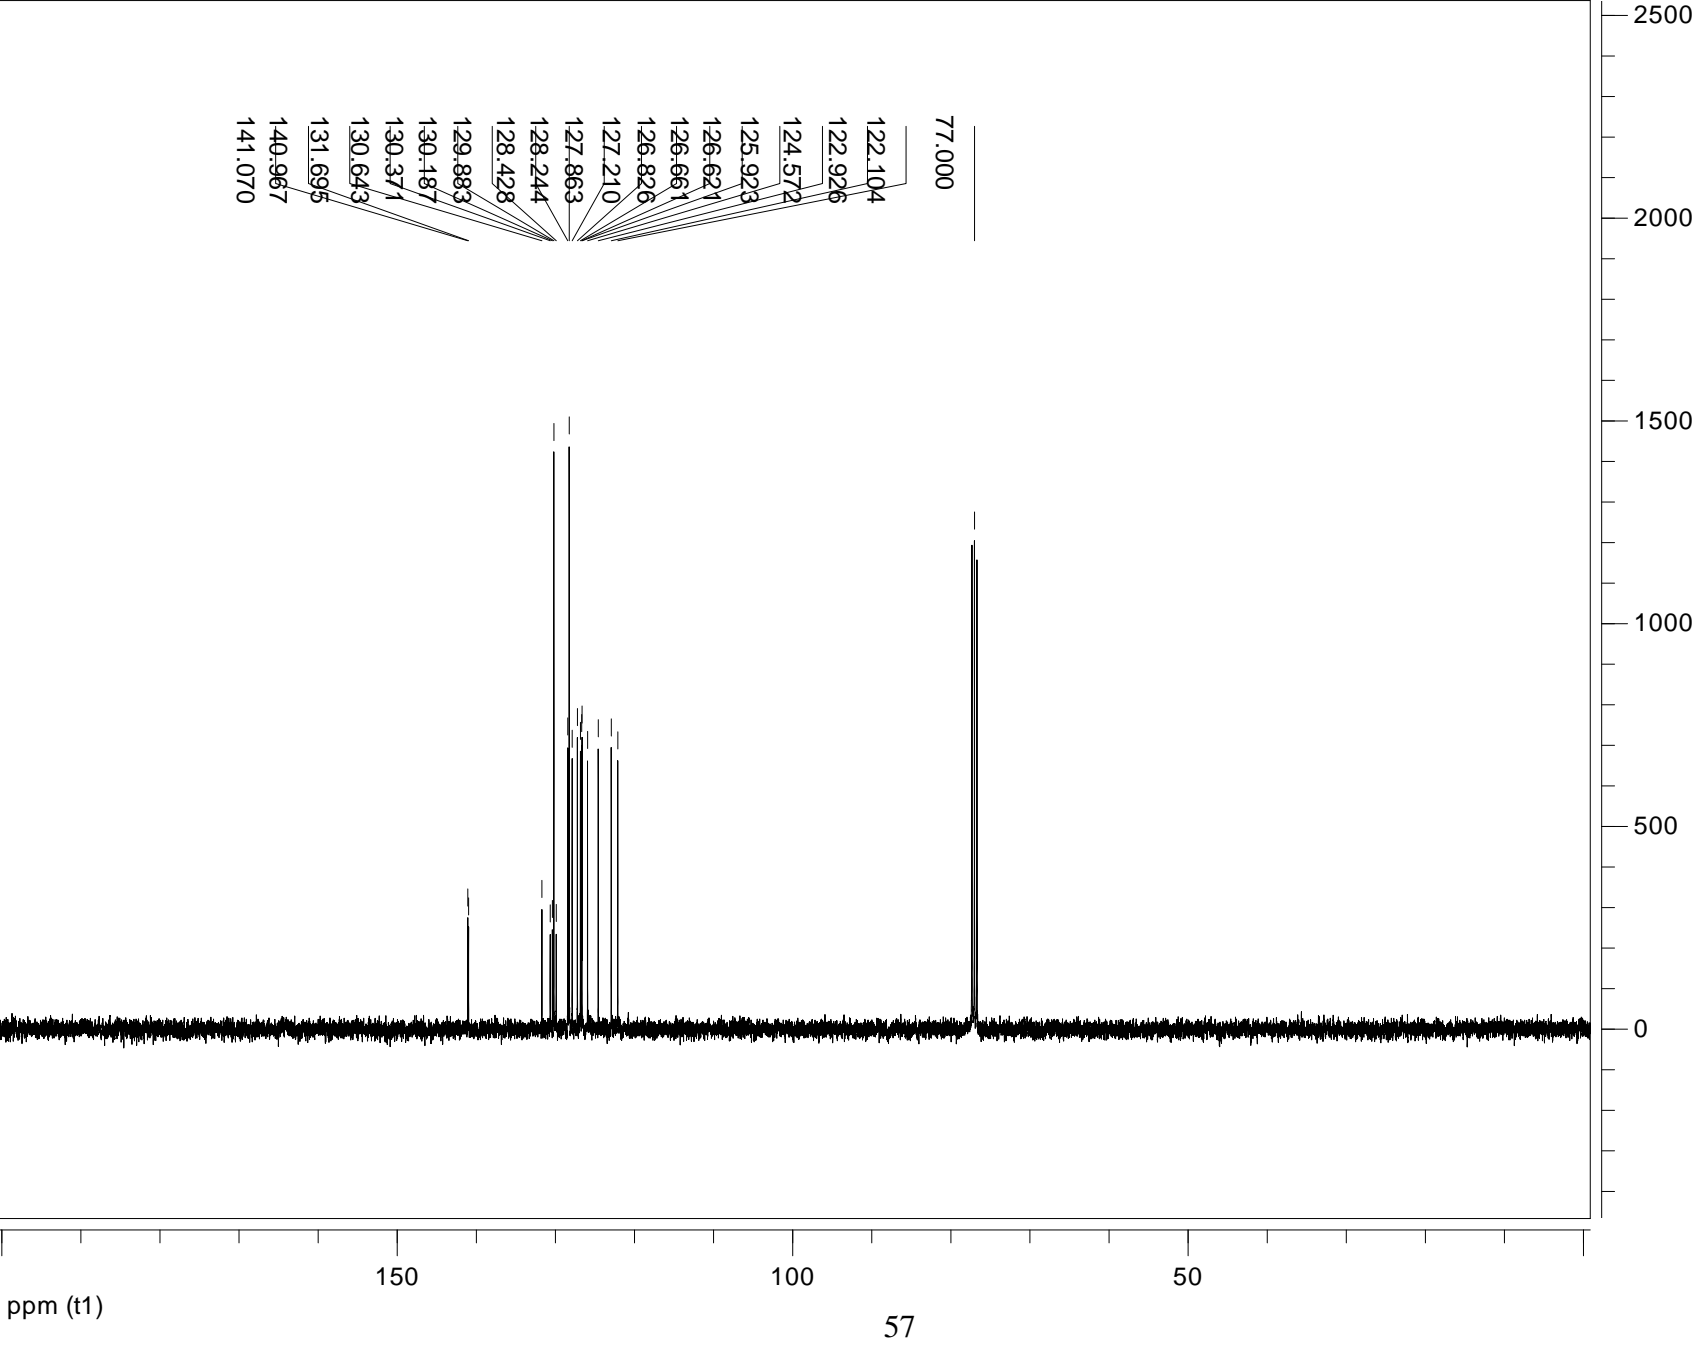

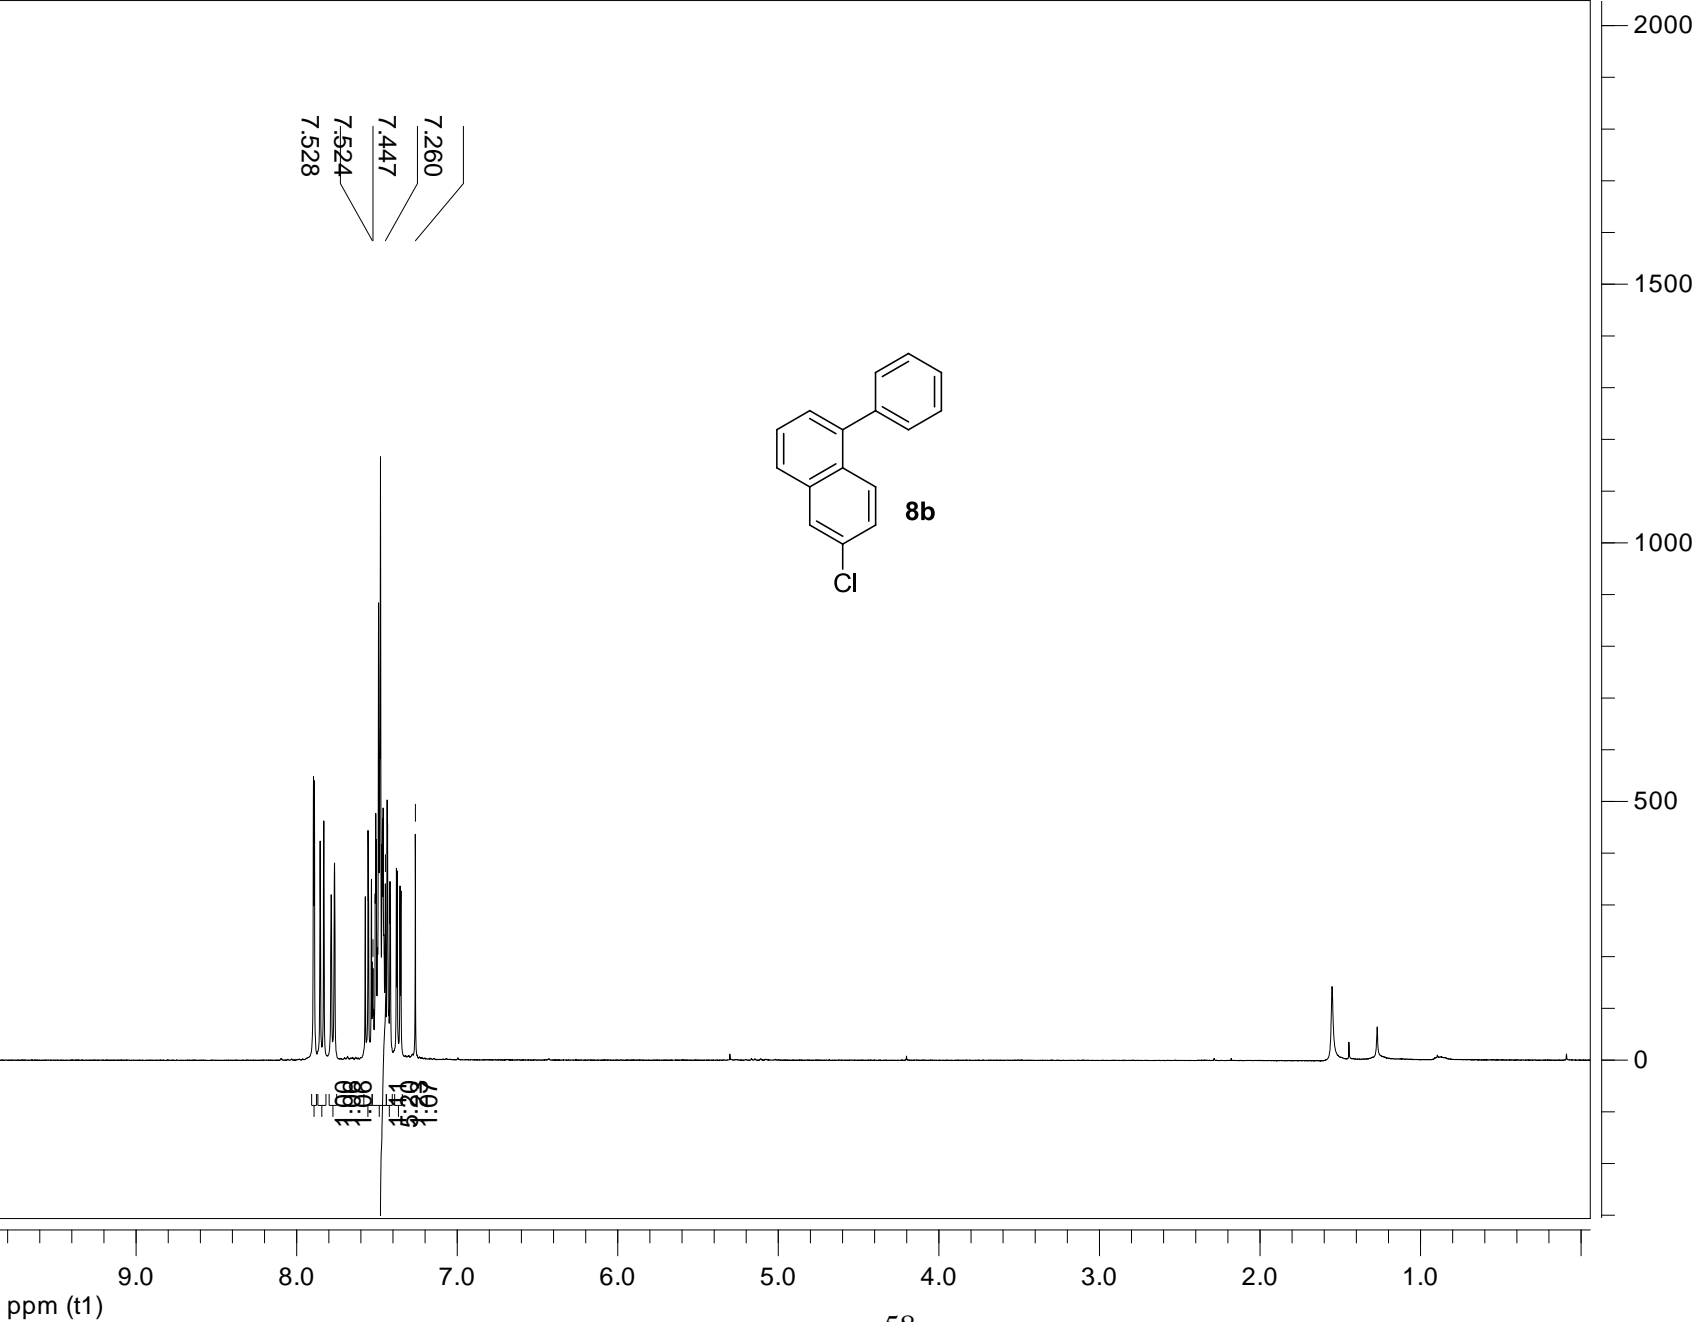

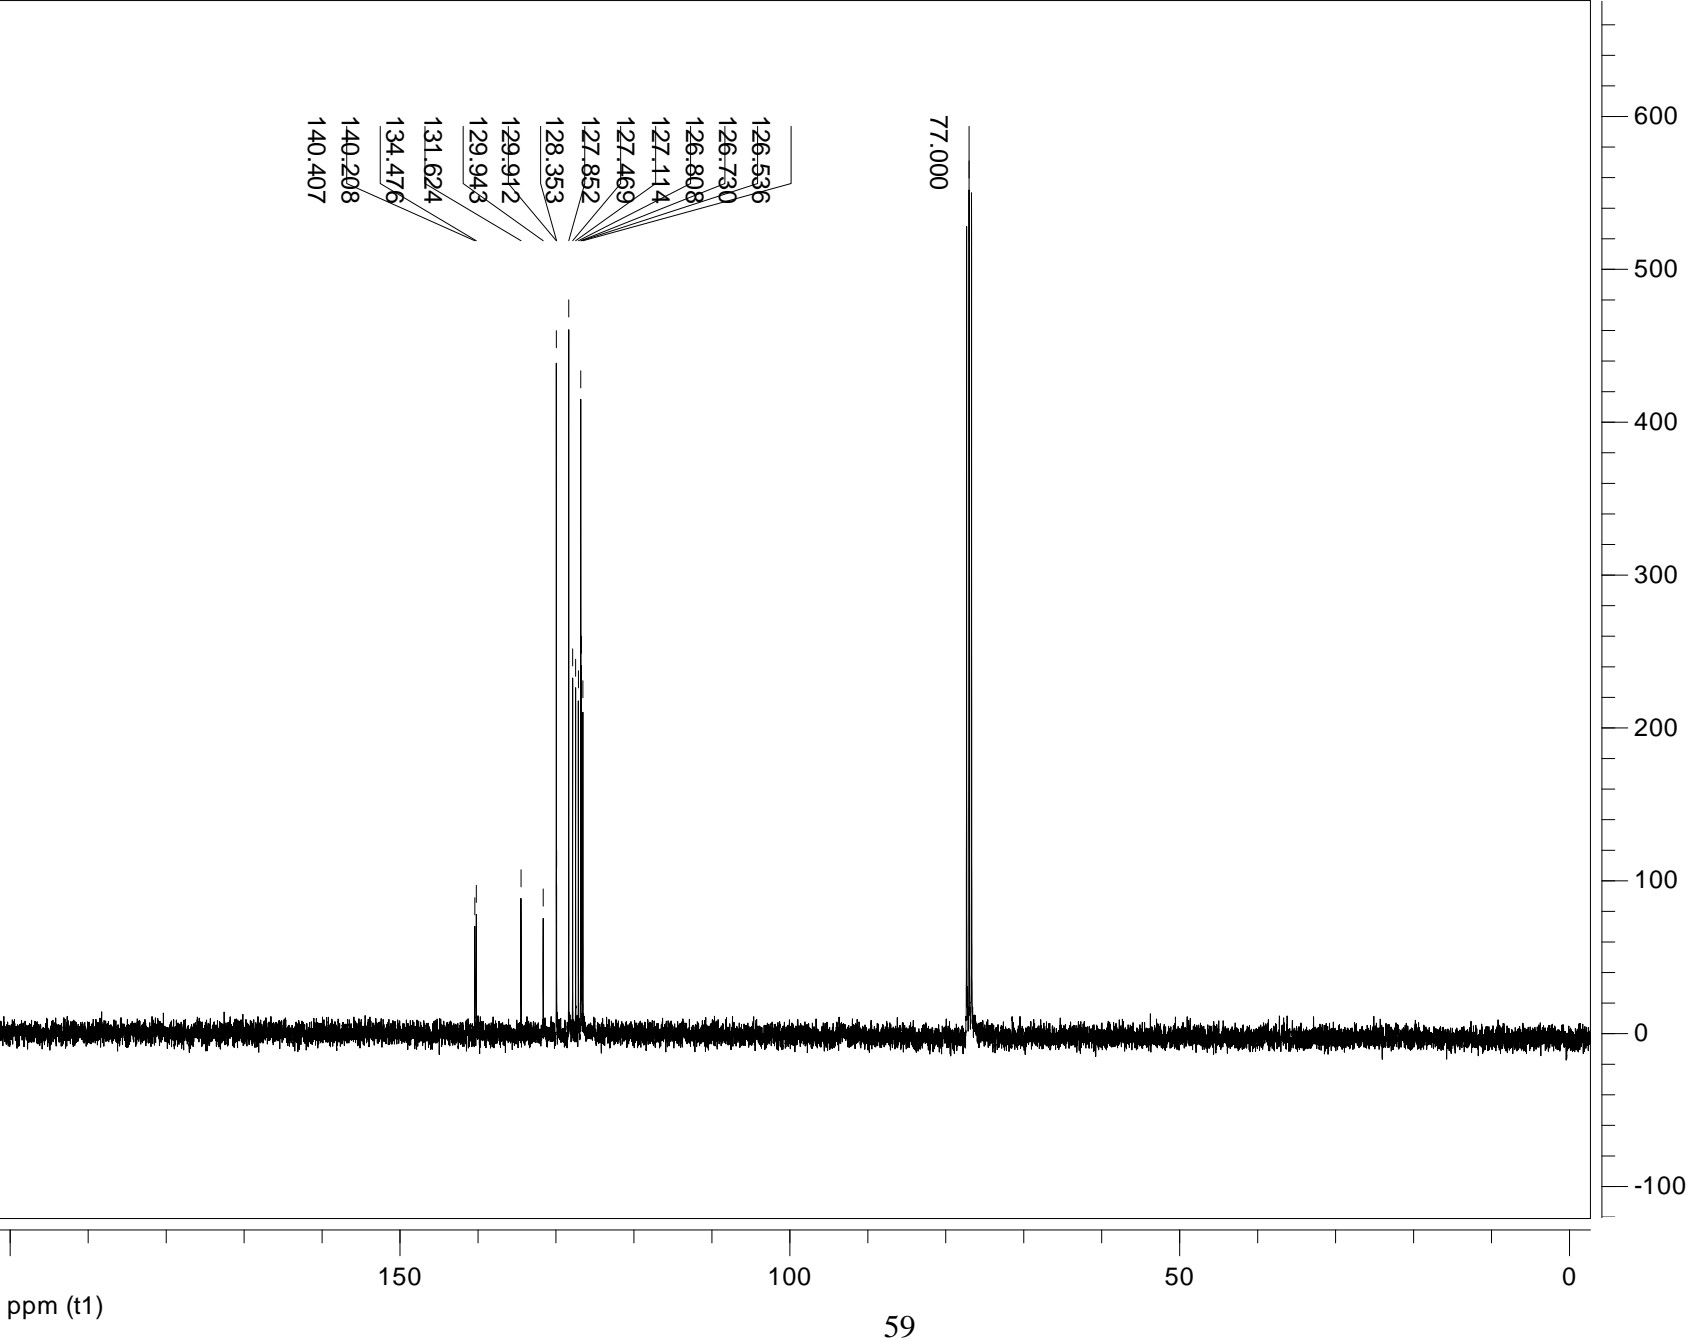

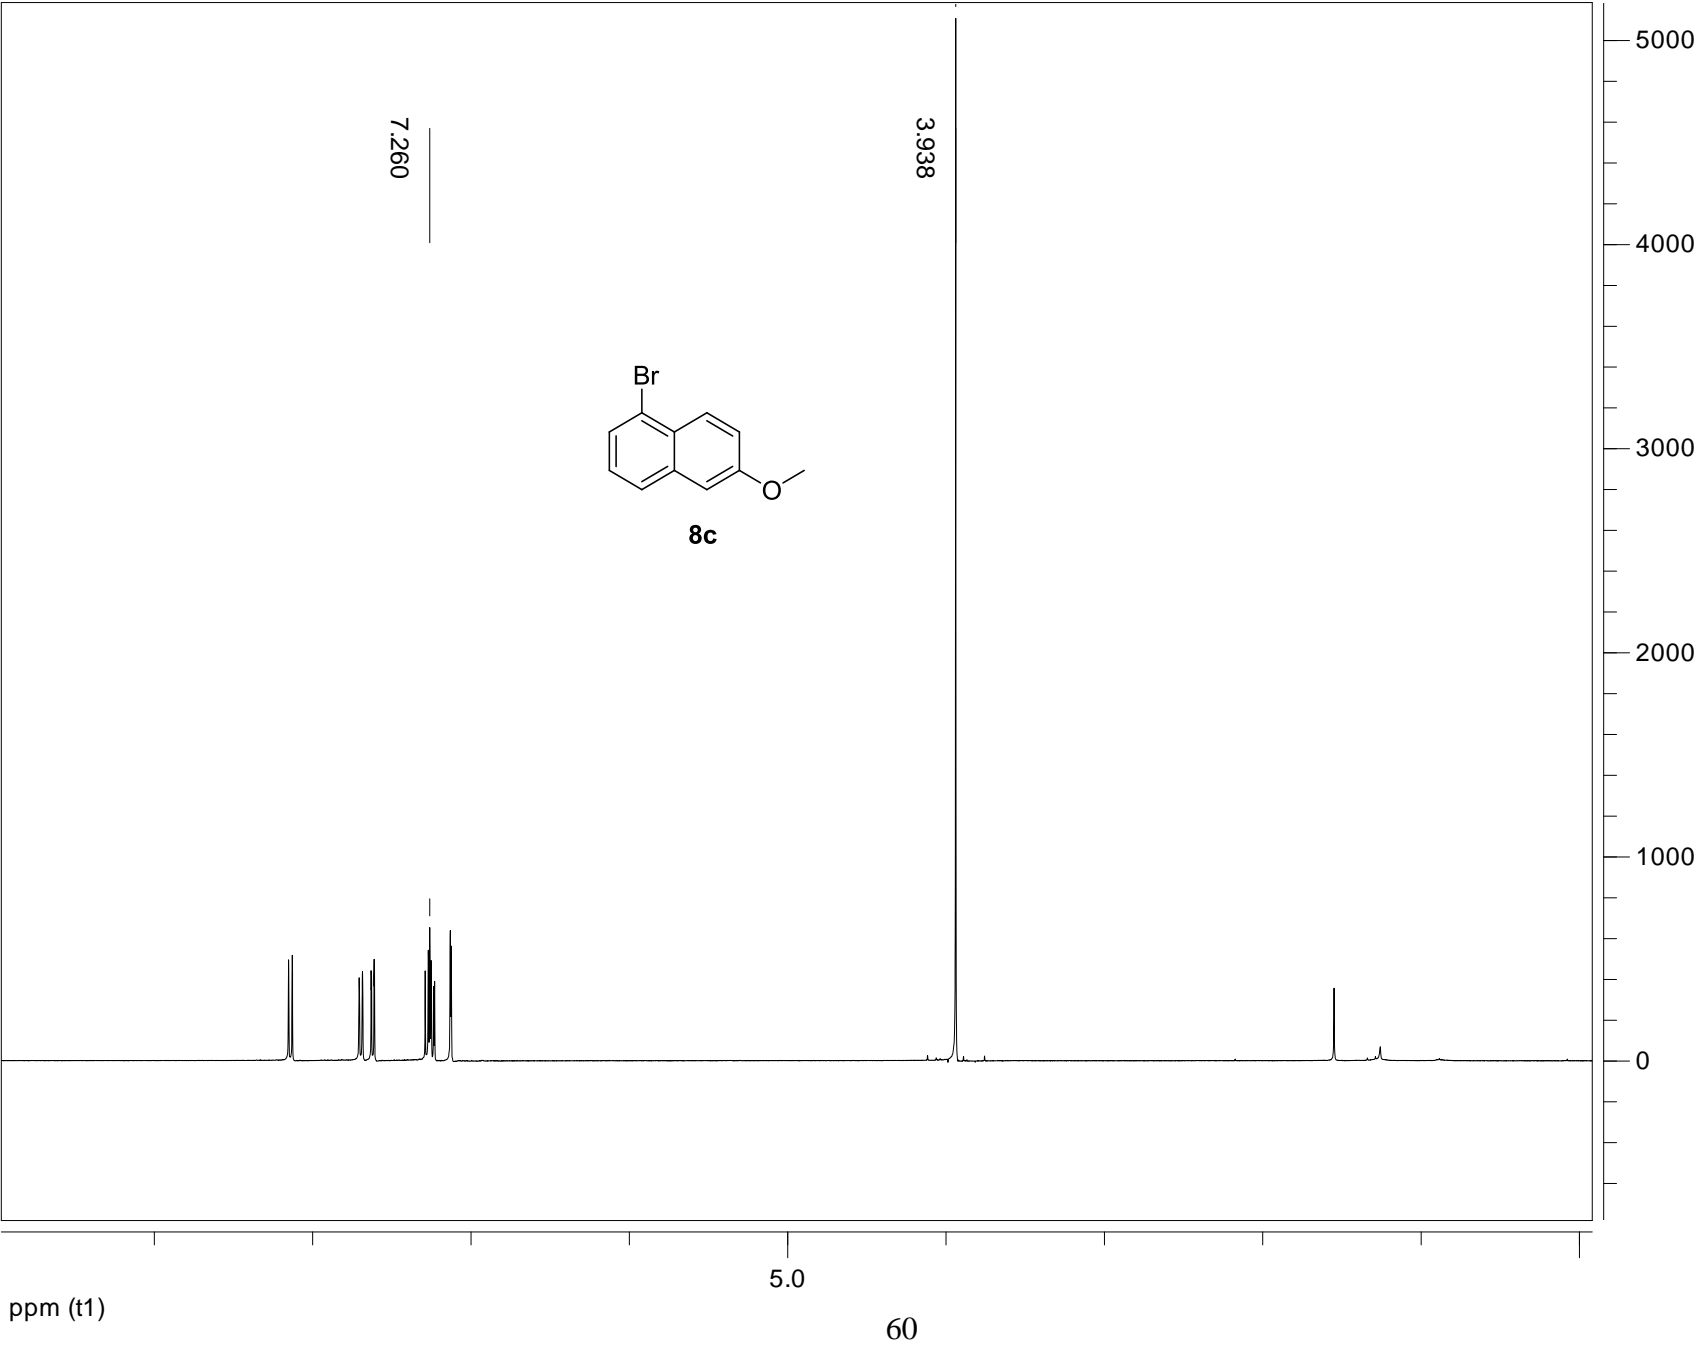

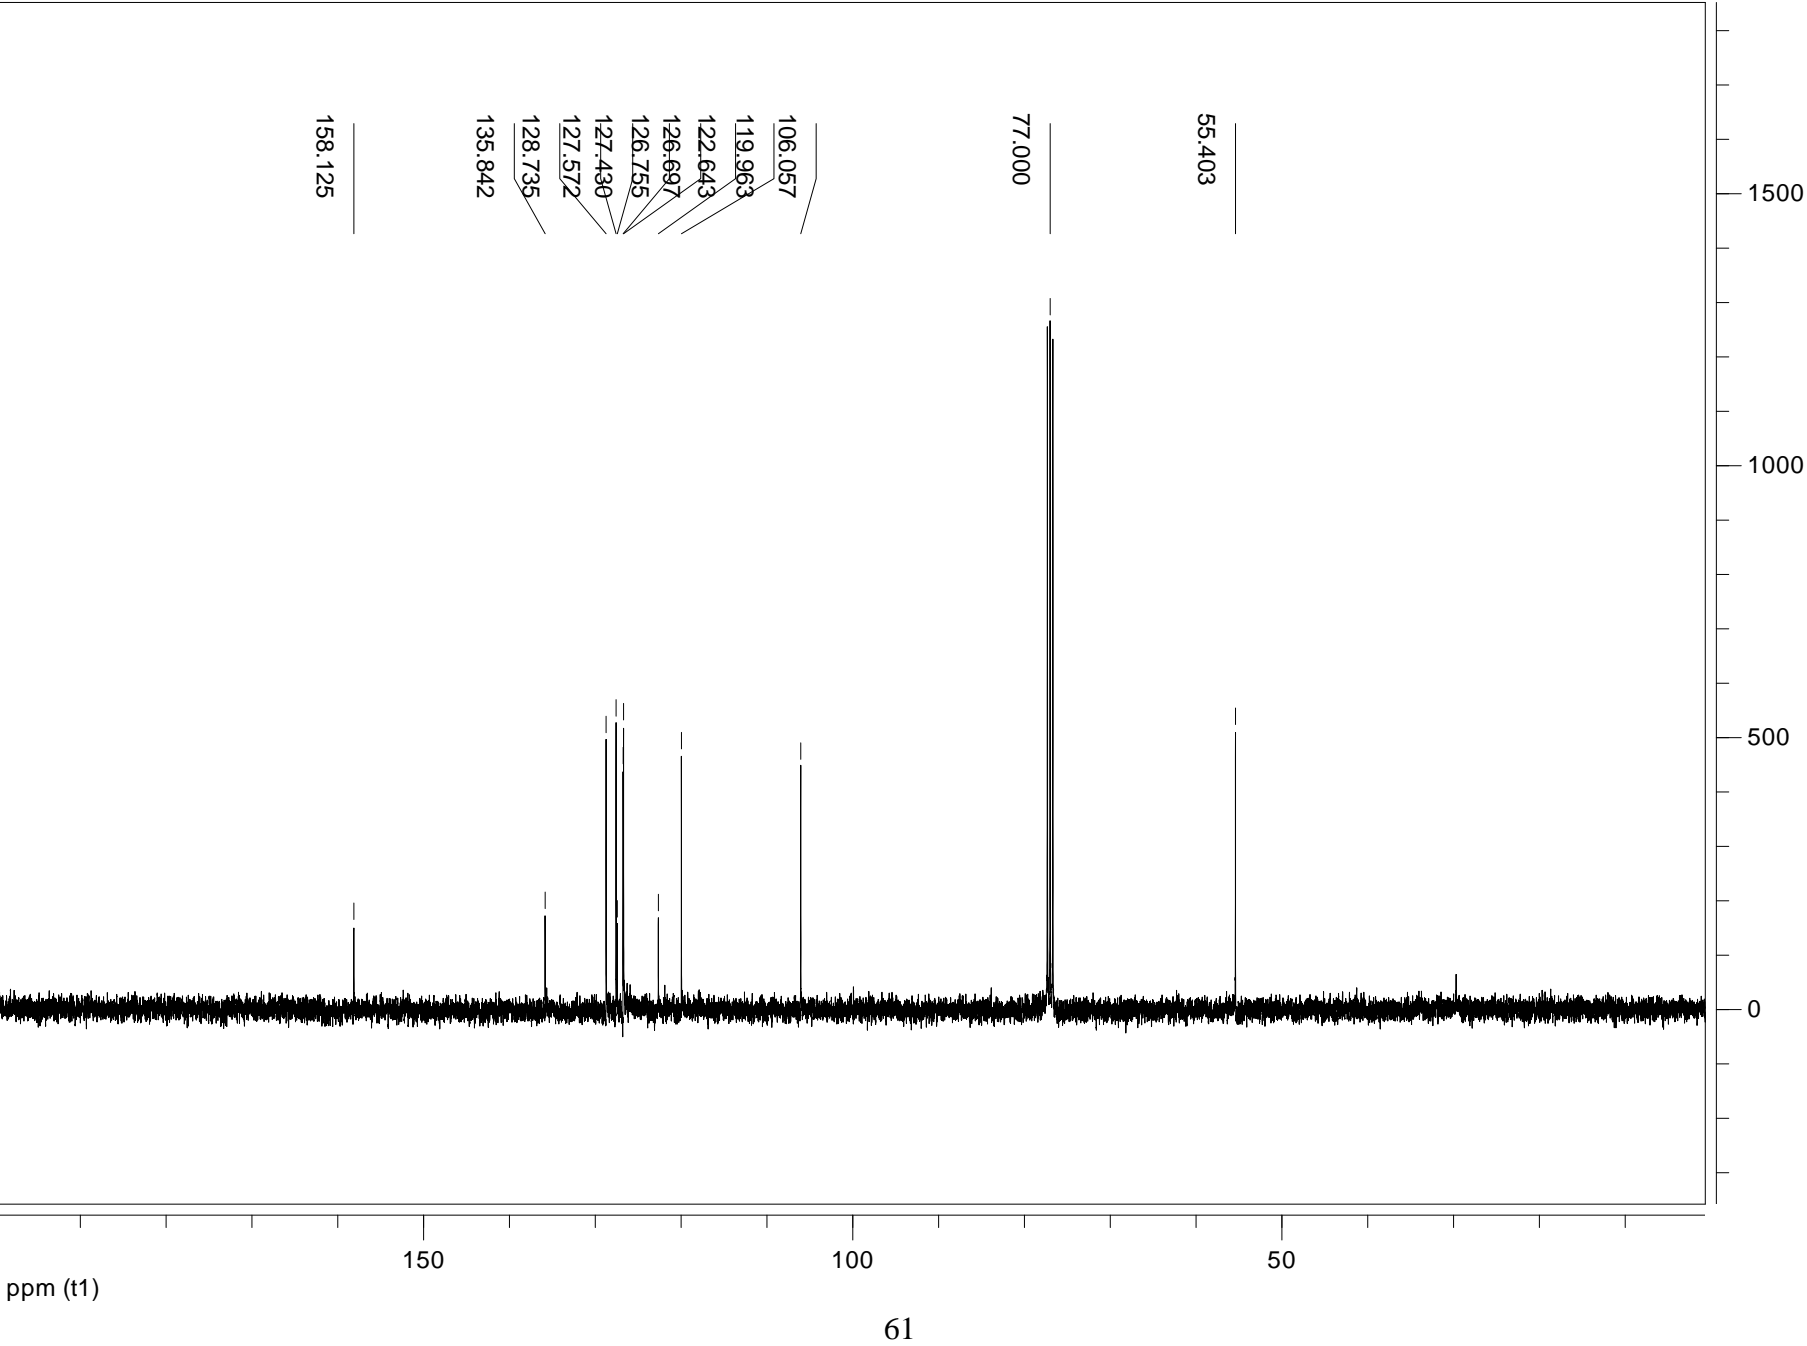

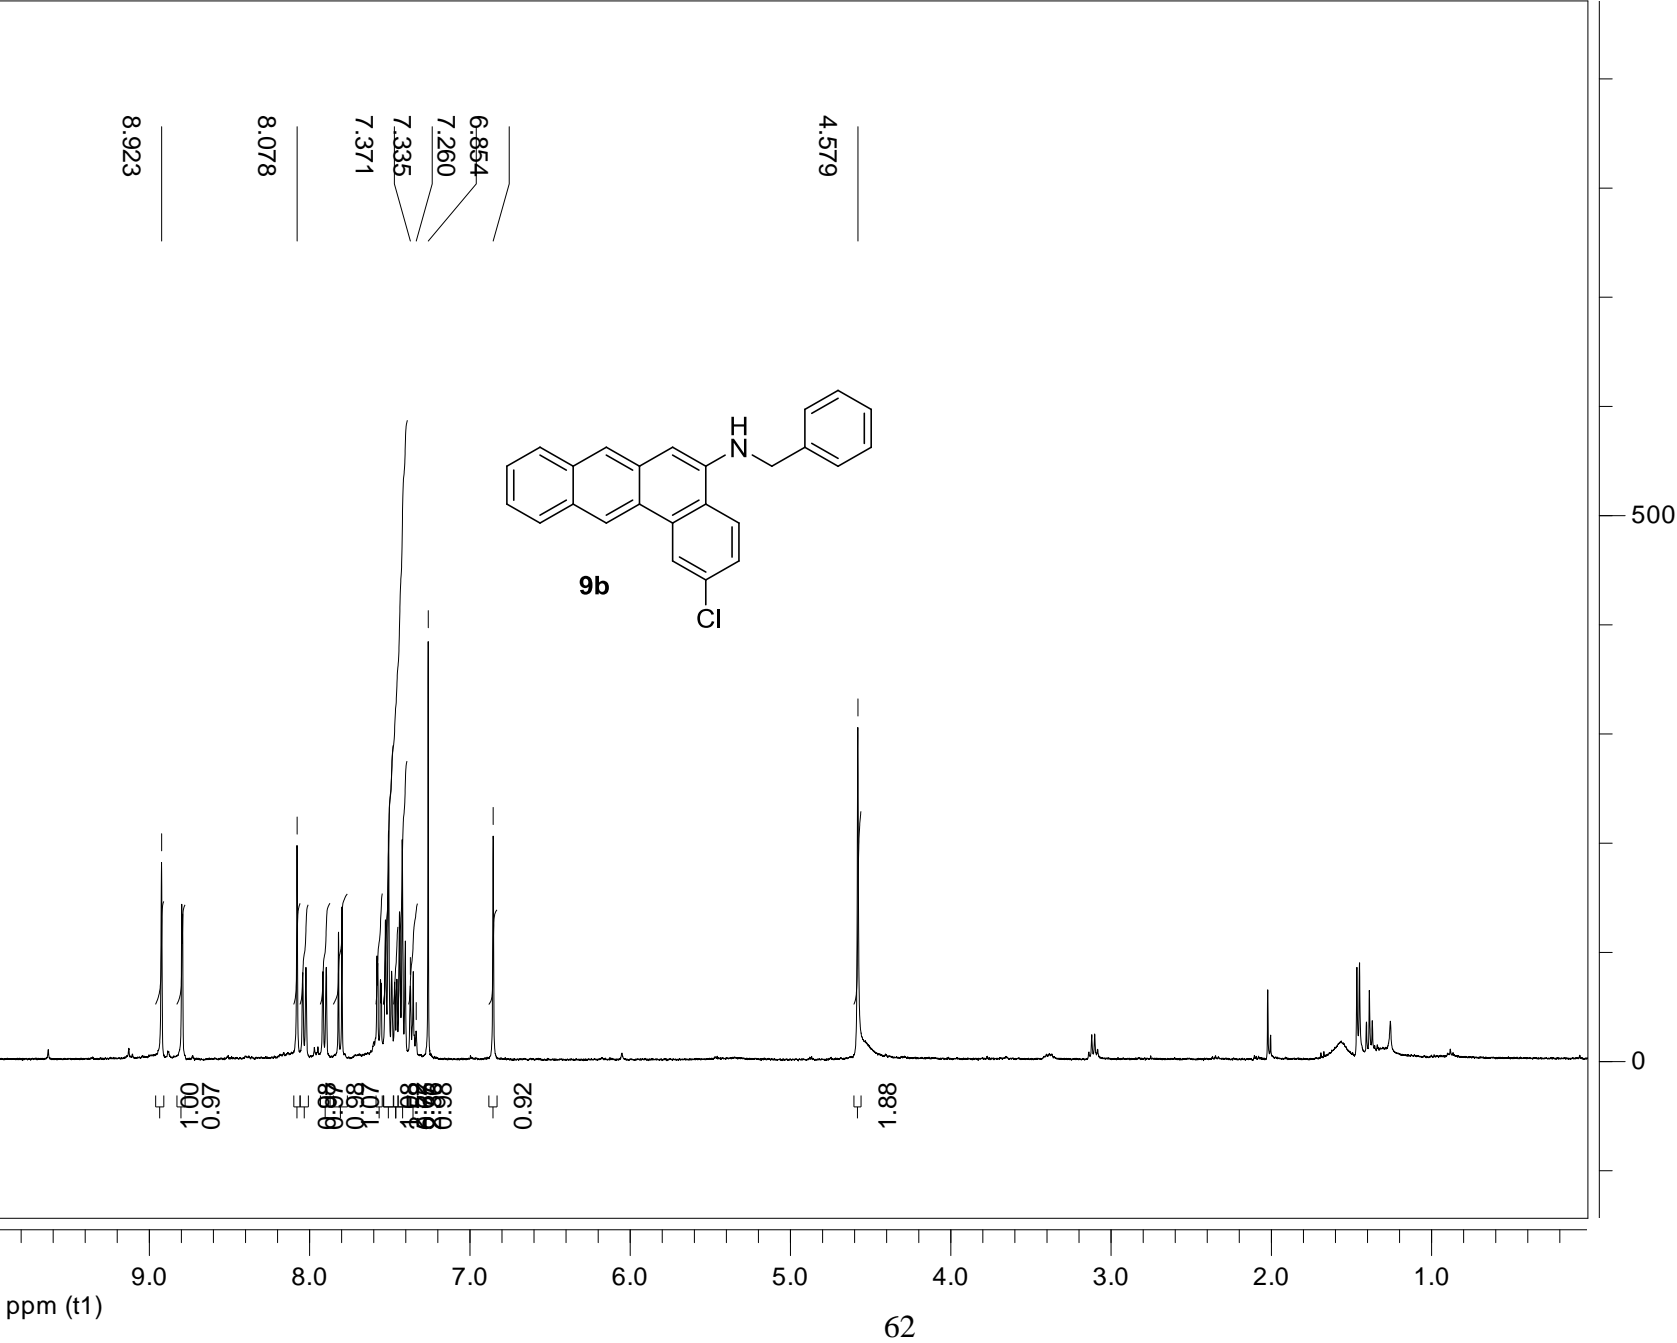

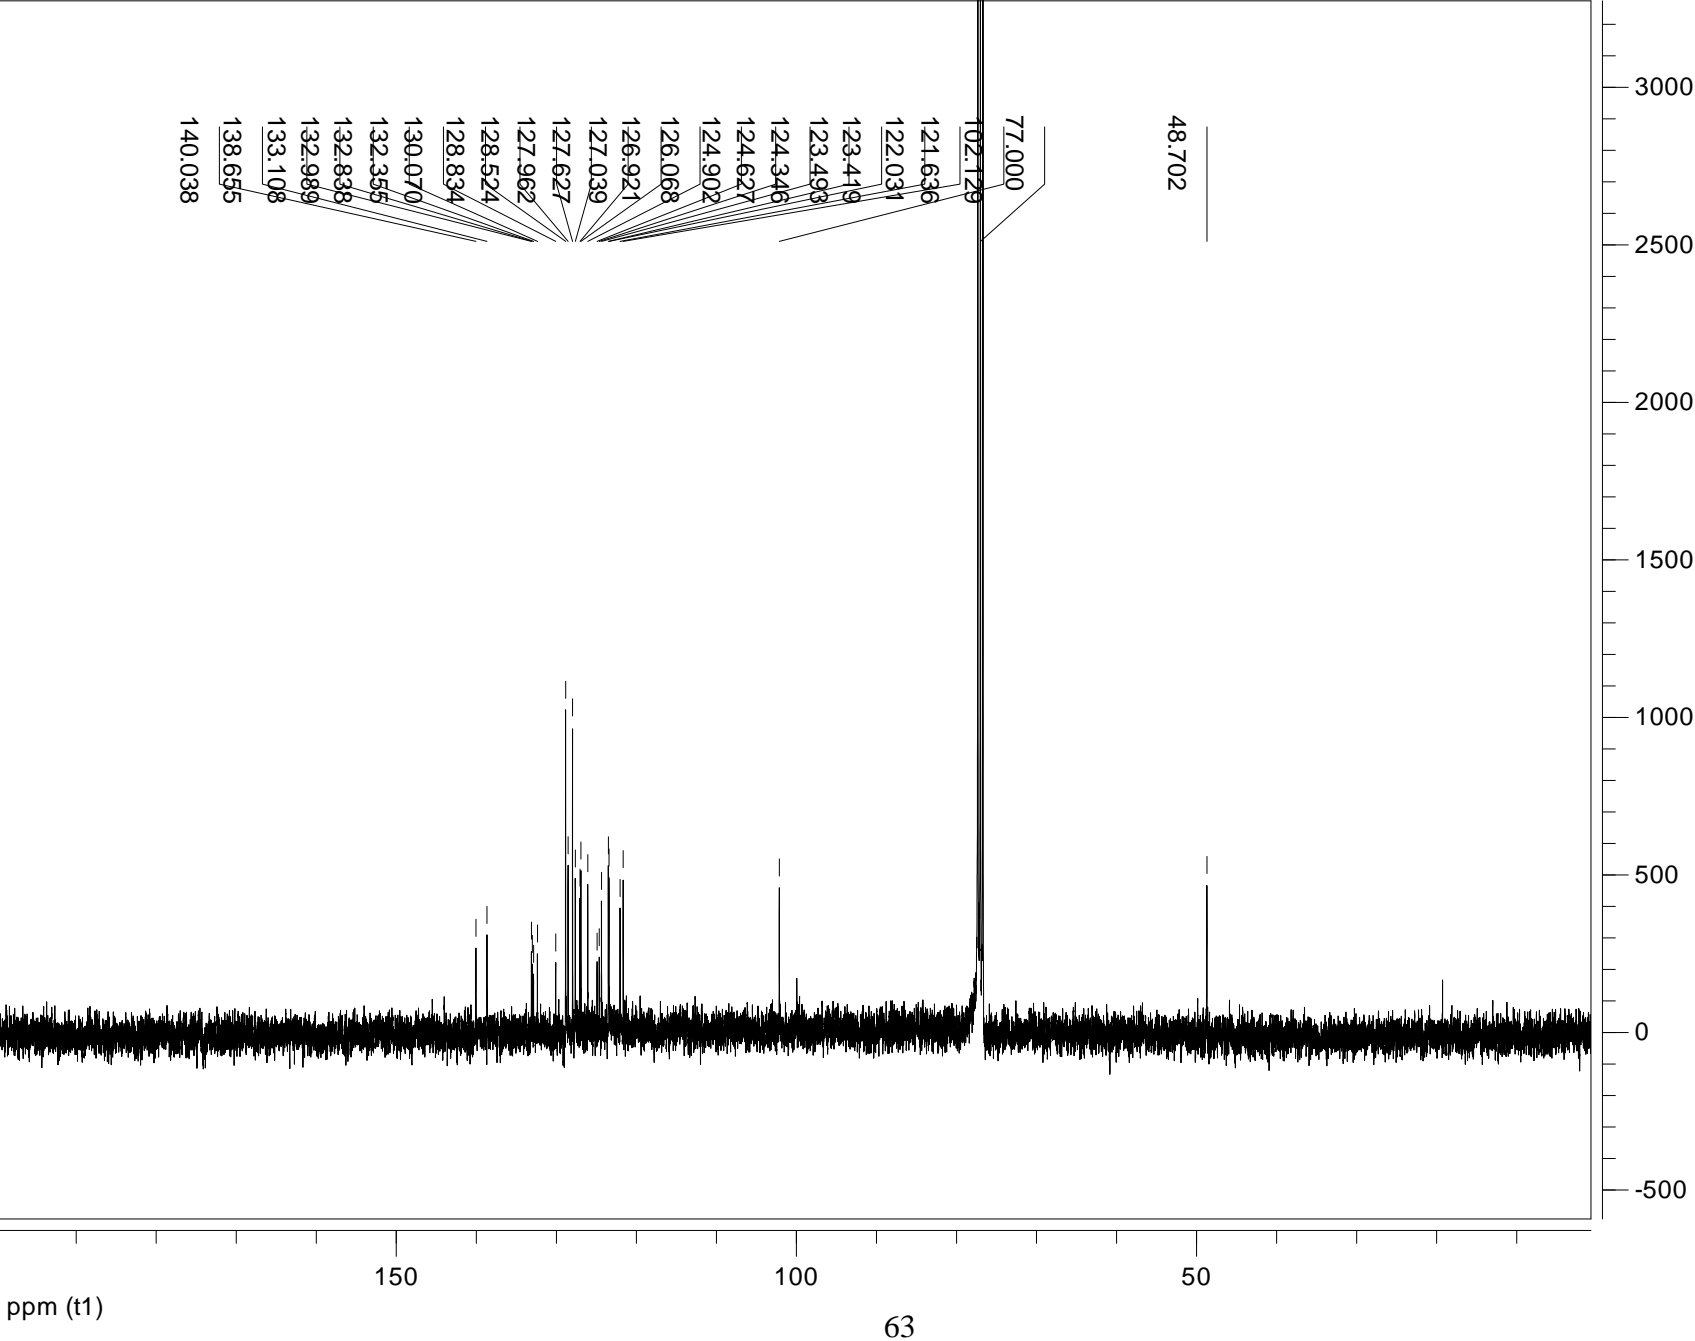

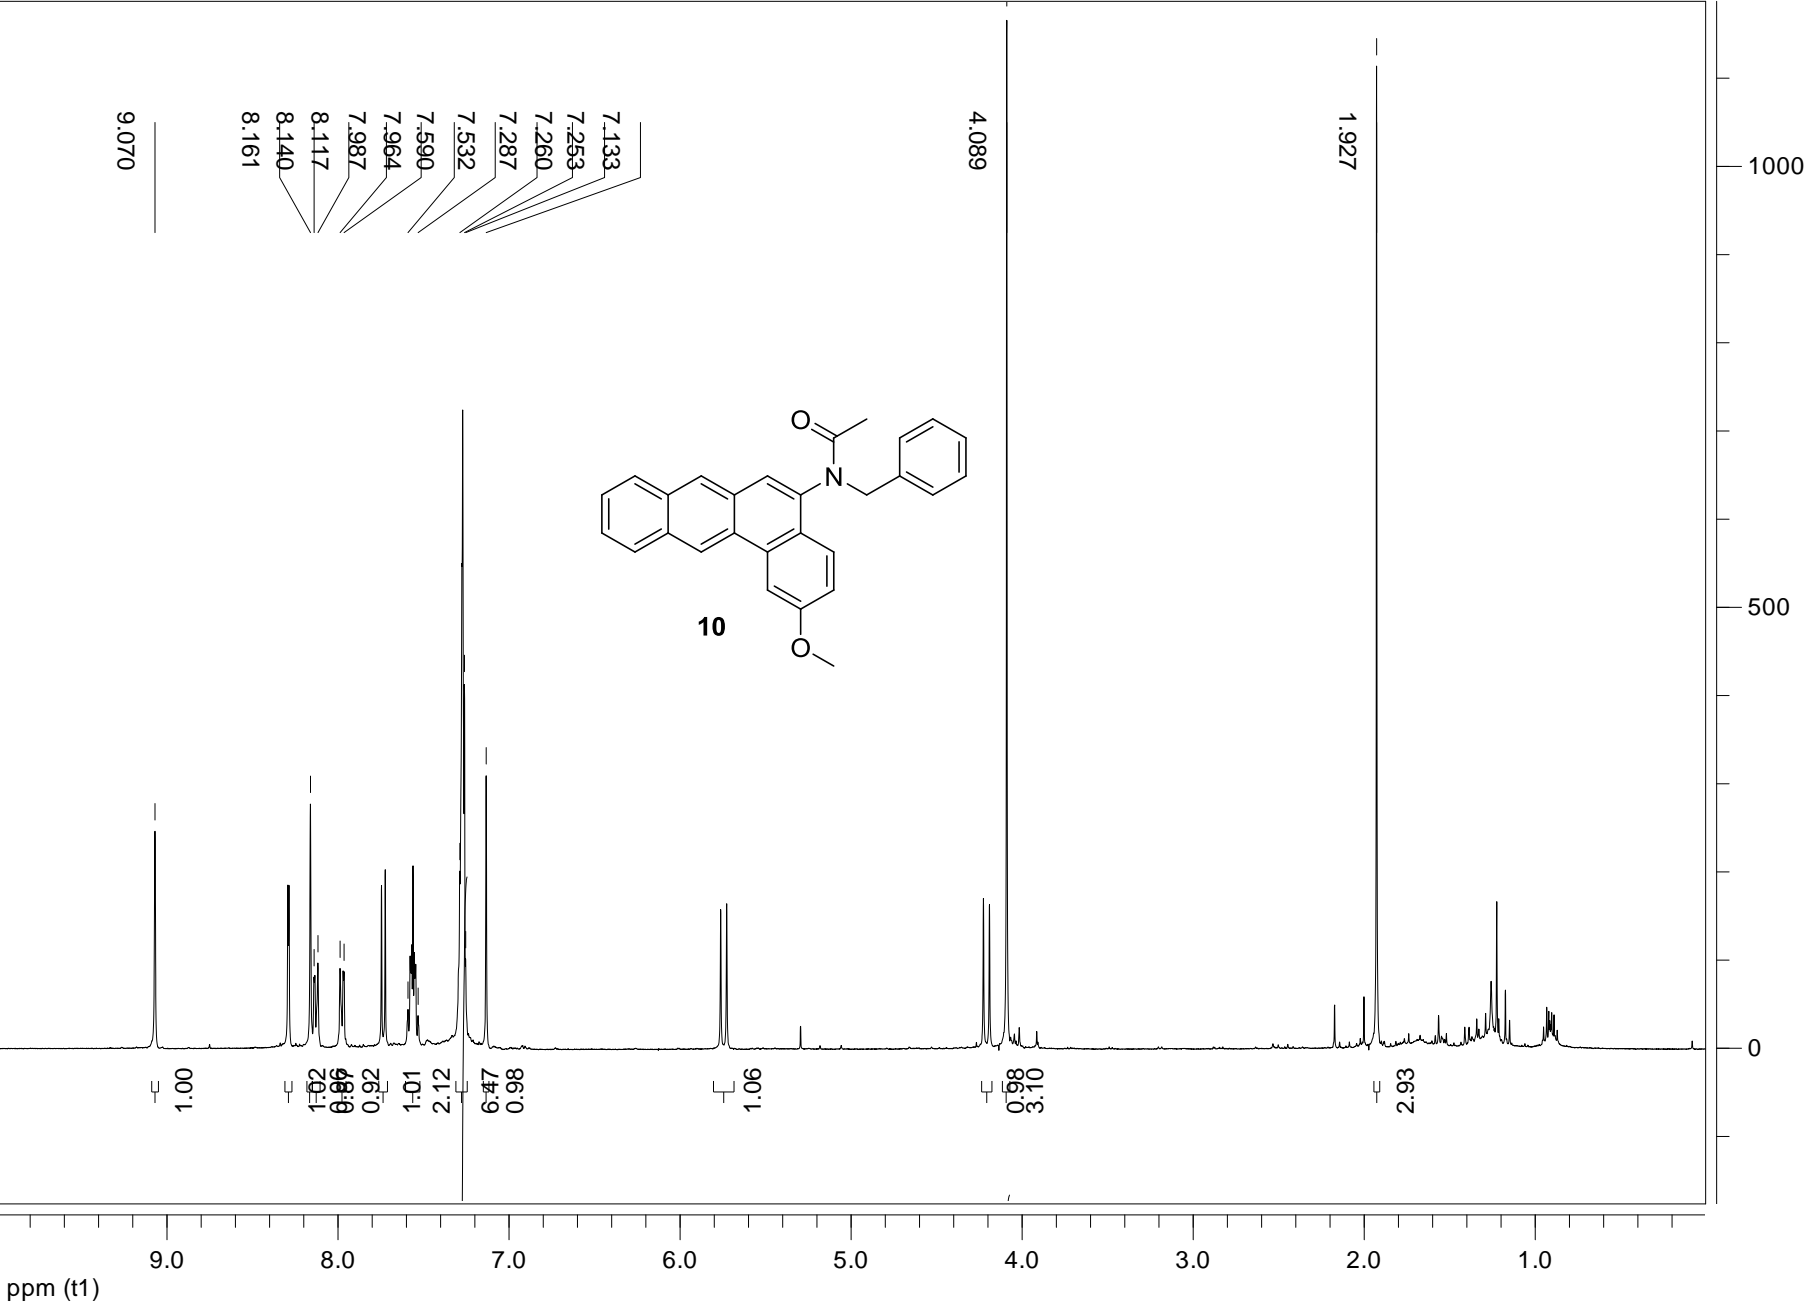



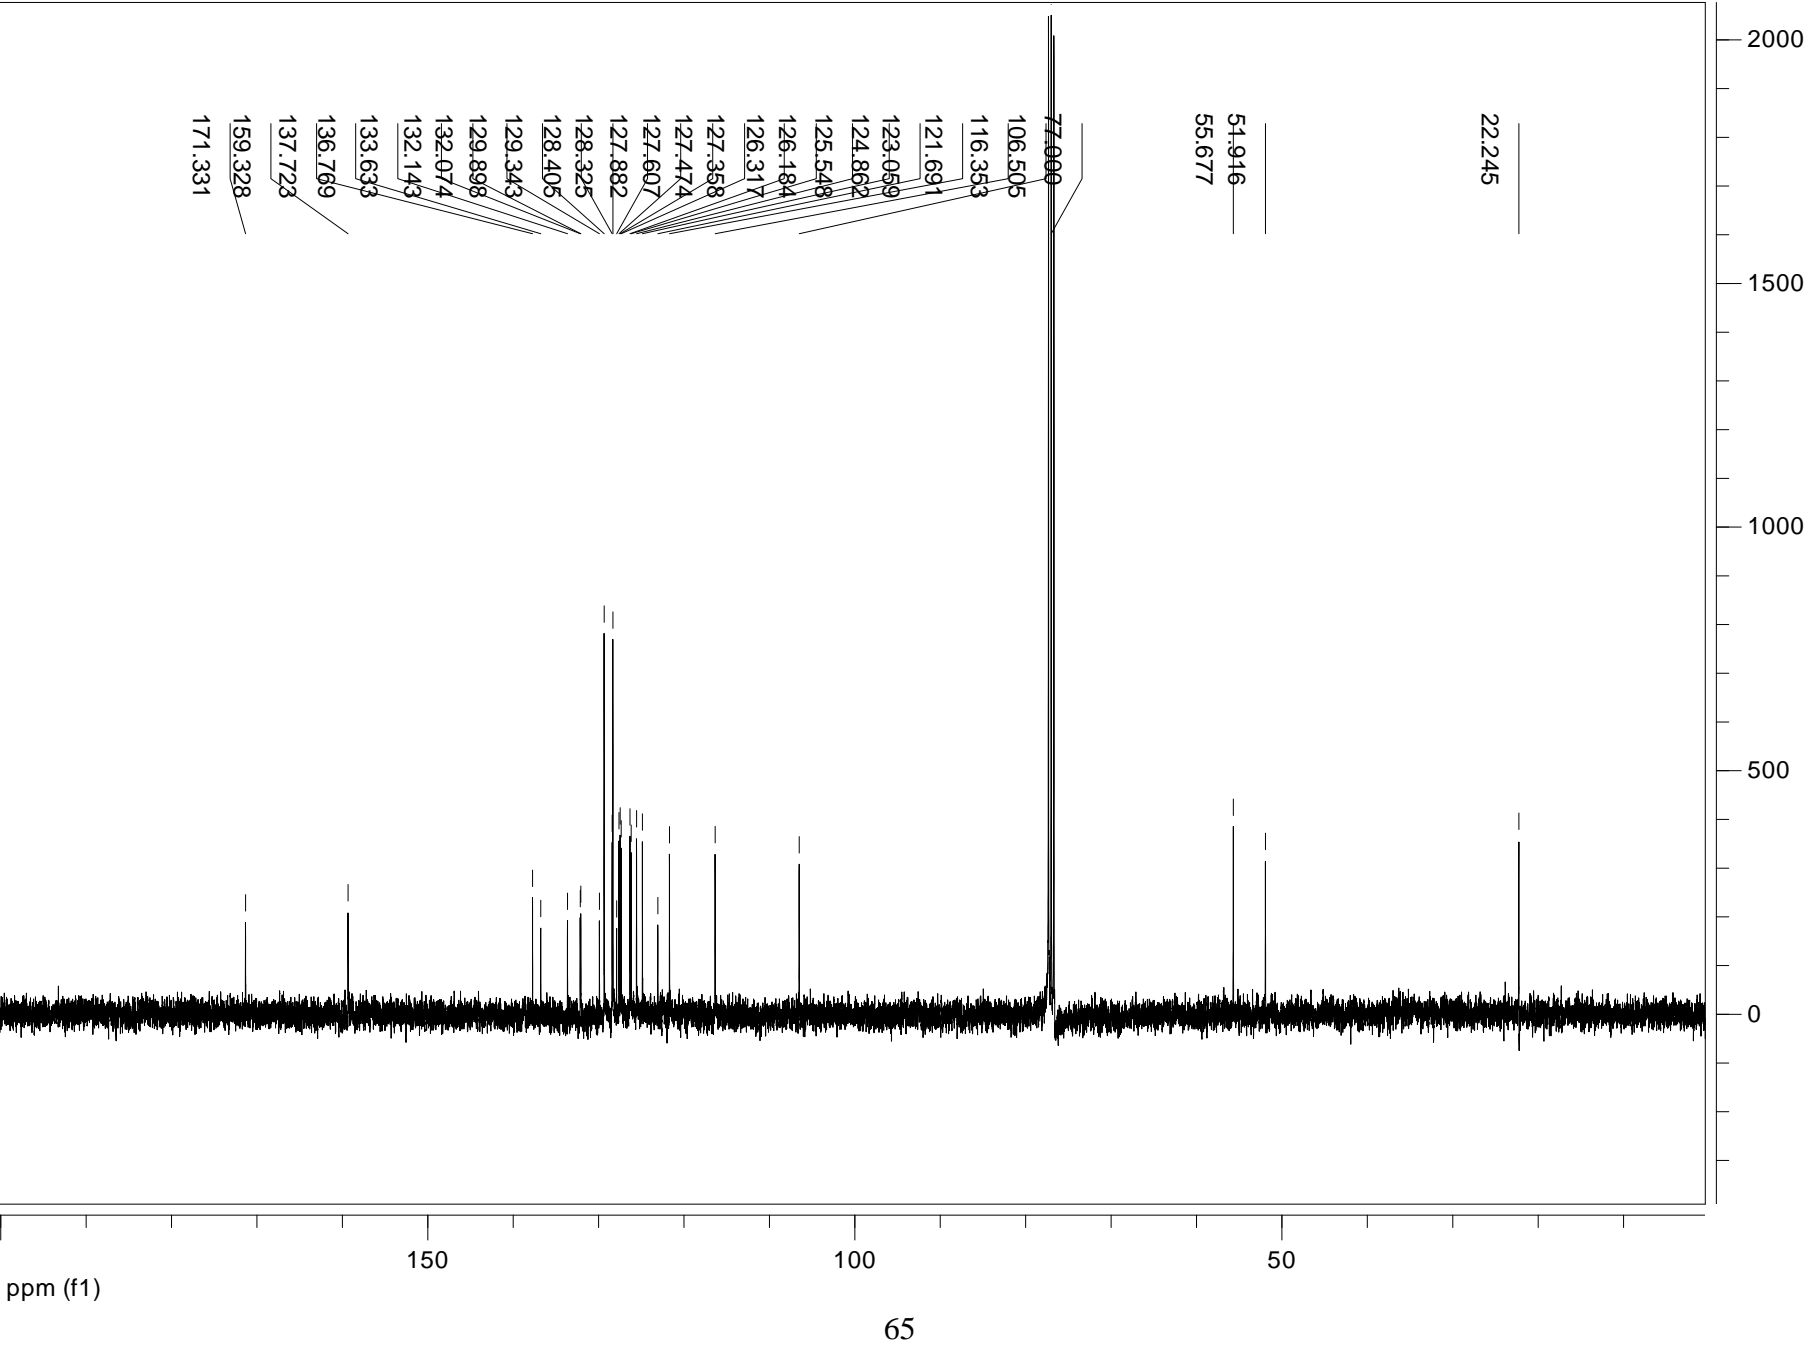

Supplement: c1cc15095b.pdf [file c1cc15095b.pdf]
